# Supplementary material for: Mechanism and stereoselectivity in NHC-catalyzed β-functionalization of saturated carboxylic ester
Source: Royal Society of Chemistry journal article supplement (doi:10.1039/c8ra10262g), 2019-01-01
Supplement: c8ra10262g1.pdf [file c8ra10262g1.pdf]

*Supporting Information*

**Mechanism and Stereoselectivity in NHC-Catalyzed  $\beta$ -Functionalization of Saturated Carboxylic Ester**

**Yan Li\*, Zhiqiang Zhang**

*School of Chemical Engineering, University of Science and Technology Liaoning,  
Anshan 114051, P. R. China*

***Corresponding person: Yan Li***

***E-mail: snow2007liyan@163.com***

***Telephone: +86-18741219506***

***Fax: 86-412-5929627***

**Fig. S1** Scan for different C4-Ha distance of process of **IM2**  $\rightarrow$  **IM3**.

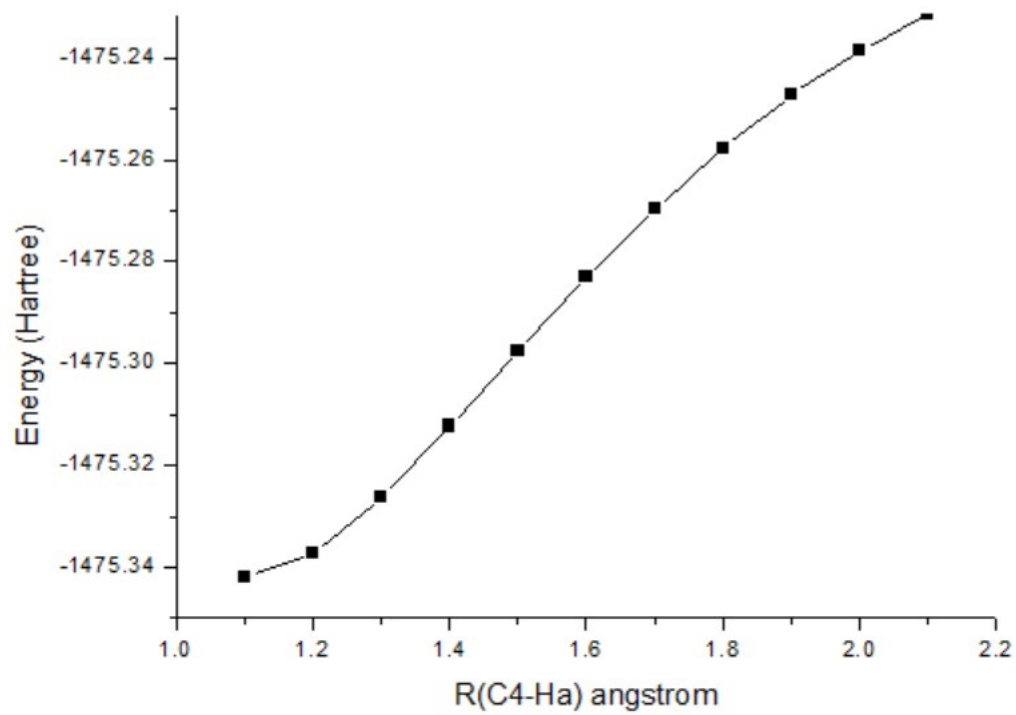

**Fig. S2** Free energy profile for the C–C bond formation step. The solvation-corrected relative free energies at SMD(THF)/M06-2X/6-311++G(d,p) level are given in kcal/mol.

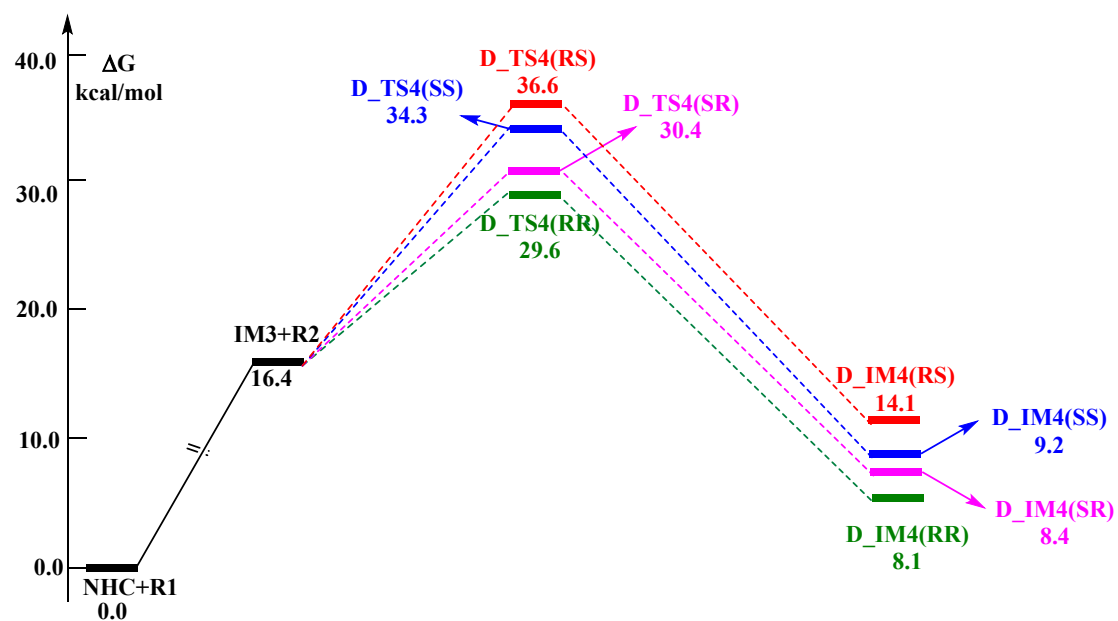

**Fig. S3** Comparison between non and HOBt assisted transition states involved in the C—C bond formation step.

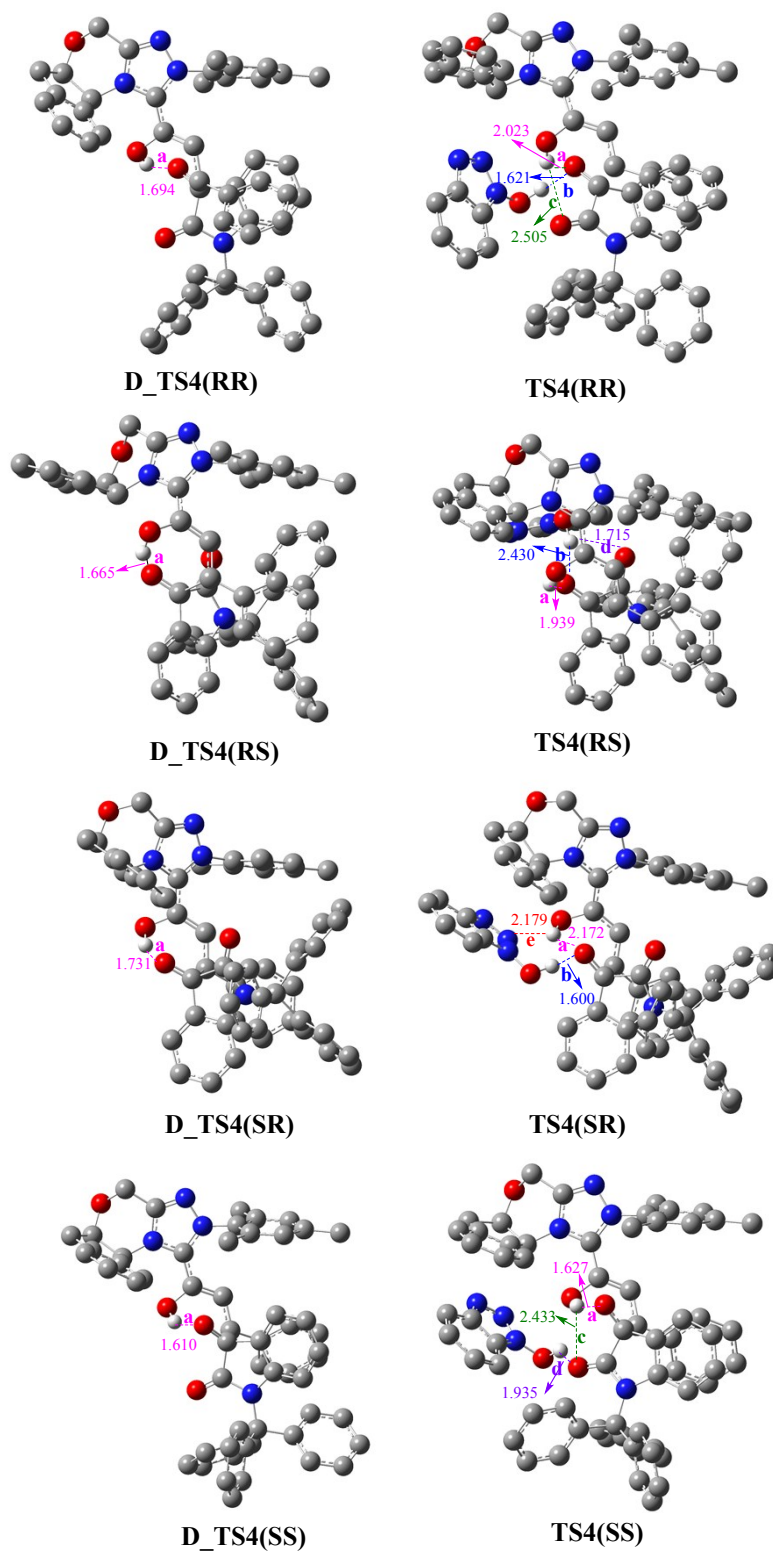

**Fig. S4** Free energy profile of the *RR*-, *RS*- and *SS*-configurational pathways (steps IV–VI) obtained at SMD(THF)/M06-2X/6-311++G(d,p) level (kcal/mol).

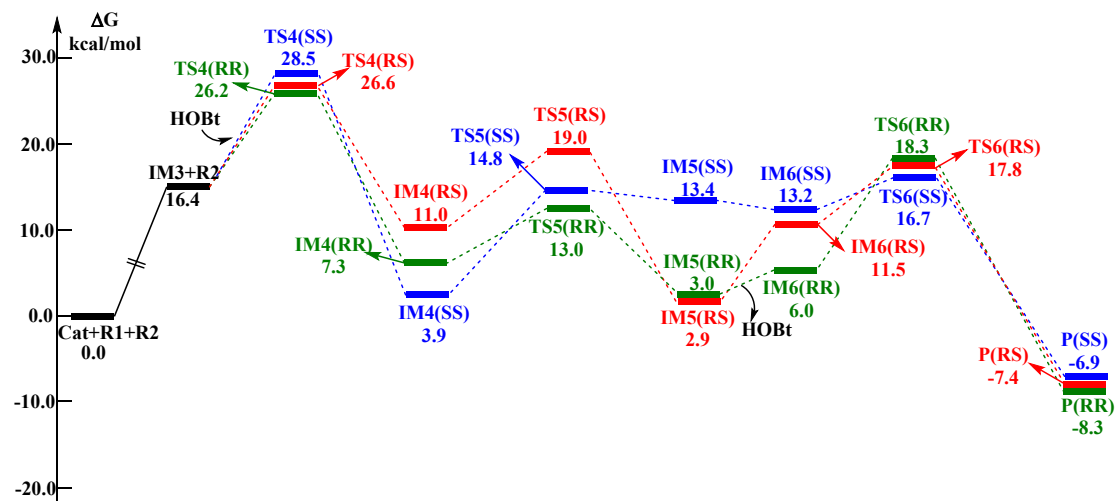

**Table S1.** Single point energies (a.u.), Gibbs free energies (a.u.) and Relative Gibbs Free Energies (kcal/mol) of the optimized structures at the SMD(THF)/M06-2X/6-311++G(d,p) level.

| species   | Esol          | Gsol          | $\Delta G$ (kcal/mol) |
|-----------|---------------|---------------|-----------------------|
| R+R2+NHC  | -3191.493292  | -3190.6082672 | 0.0                   |
| TS1-1     | -3191.493684  | -3190.5791041 | 18.3                  |
| TS1       | -3191.496492  | -3190.5833369 | 15.6                  |
| IM01-1    | -3191.507428  | -3190.5928141 | 9.7                   |
| IM01      | -3191.513423  | -3190.5982538 | 6.3                   |
| IM1       | -3191.47376   | -3190.5866506 | 13.6                  |
| B_TS2     | -3191.484489  | -3190.5745353 | 21.2                  |
| TS2       | -3191.4955411 | -3190.5828221 | 16.0                  |
| IM2       | -3191.4786827 | -3190.5879987 | 12.7                  |
| A-TS3     | -3191.4738308 | -3190.5682068 | 25.1                  |
| B-TS3     | -3191.4548083 | -3190.5448993 | 39.8                  |
| D_TS3     | -3191.4236972 | -3190.5384162 | 43.8                  |
| TS3       | -3191.4498691 | -3190.5440621 | 40.3                  |
| IM3       | -3191.4695368 | -3190.5820558 | 16.4                  |
| D_TS4(RR) | -3191.4803504 | -3190.5610704 | 29.6                  |
| D_TS4(RS) | -3191.4707391 | -3190.5498671 | 36.6                  |
| D_TS4(SR) | -3191.4809894 | -3190.5598574 | 30.4                  |
| D_TS4(SS) | -3191.4747198 | -3190.5536568 | 34.3                  |
| TS4(RR)   | -3191.5091539 | -3190.5665569 | 26.2                  |

|         |               |               |      |
|---------|---------------|---------------|------|
| TS4(RS) | -3191.5086063 | -3190.5659103 | 26.6 |
| TS4(SR) | -3191.513926  | -3190.5695127 | 24.3 |
| TS4(SS) | -3191.5052965 | -3190.5628455 | 28.5 |
| IM4(RR) | -3191.5450410 | -3190.5965850 | 7.3  |
| IM4(RS) | -3191.5369255 | -3190.5906995 | 11.0 |
| IM4(SR) | -3191.5463082 | -3190.6014312 | 4.3  |
| IM4(SS) | -3191.5497800 | -3190.6021220 | 3.9  |
| TS5(RR) | -3191.5279227 | -3190.5875197 | 13.0 |
| TS5(RS) | -3191.5225848 | -3190.5780668 | 19.0 |
| TS5(SR) | -3191.5284772 | -3190.5851732 | 14.5 |
| TS5(SS) | -3191.5251831 | -3190.5846401 | 14.8 |
| IM5(RR) | -3191.5507886 | -3190.6035066 | 3.0  |
| IM5(RS) | -3191.5517740 | -3190.6036230 | 2.9  |
| IM5(SR) | -3191.5363459 | -3190.5883439 | 12.5 |
| IM5(SS) | -3191.5352298 | -3190.5869168 | 13.4 |
| TS6(RR) | -3191.5012640 | -3190.5790330 | 18.3 |
| TS6(RS) | -3191.5037868 | -3190.5799748 | 17.8 |
| TS6(SR) | -3191.5065049 | -3190.5807479 | 17.3 |
| TS6(SS) | -3191.5024355 | -3190.5816955 | 16.7 |
| IM6(RR) | -3191.5441895 | -3190.5986835 | 6.0  |
| IM6(RS) | -3191.5153270 | -3190.5898870 | 11.5 |
| IM6(SR) | -3191.5165551 | -3190.5902621 | 11.3 |
| IM6(SS) | -3191.5117108 | -3190.5872108 | 13.2 |

|       |               |               |       |
|-------|---------------|---------------|-------|
| P(RR) | -3191.5164718 | -3190.6214948 | -8.3  |
| P(RS) | -3191.5165987 | -3190.6200547 | -7.4  |
| P(SS) | -3191.5134398 | -3190.6191858 | -6.9  |
| P(SR) | -3191.5194118 | -3190.6246568 | -10.3 |

---



**The energies and Cartesian coordinates of all the optimized structures involved in the reaction.**

**NHC**

NImag = 0

|                                              |              |
|----------------------------------------------|--------------|
| Sum of electronic and zero-point Energies=   | -1051.496568 |
| Sum of electronic and thermal Energies=      | -1051.475492 |
| Sum of electronic and thermal Enthalpies=    | -1051.474548 |
| Sum of electronic and thermal Free Energies= | -1051.548600 |

|   |             |              |              |
|---|-------------|--------------|--------------|
| C | 4. 51439800 | 2. 66120900  | -0. 22157900 |
| C | 4. 98511900 | 1. 38524700  | 0. 07915100  |
| C | 4. 17083900 | 0. 28720100  | -0. 18670000 |
| C | 2. 42975300 | 1. 74663200  | -1. 04432200 |
| C | 3. 24540200 | 2. 84289600  | -0. 77852500 |
| H | 5. 13755400 | 3. 52583800  | -0. 01374300 |
| H | 5. 96874400 | 1. 25134800  | 0. 52110000  |
| H | 1. 43458500 | 1. 86603700  | -1. 46630400 |
| H | 2. 89389700 | 3. 84567100  | -1. 00067300 |
| C | 2. 91175600 | 0. 47683600  | -0. 74711300 |
| C | 2. 18582700 | -0. 83602900 | -0. 94201200 |
| C | 3. 09167900 | -1. 89209600 | -0. 20695900 |
| H | 2. 07490300 | -1. 08022700 | -2. 00202500 |
| C | 4. 44430100 | -1. 17792200 | 0. 04587700  |
| H | 3. 22035500 | -2. 77691700 | -0. 83257800 |
| H | 4. 79542800 | -1. 39983300 | 1. 05934900  |

|   |             |             |             |
|---|-------------|-------------|-------------|
| H | 5.20820800  | -1.54979100 | -0.64662200 |
| N | 0.85224400  | -0.79650700 | -0.37663000 |
| O | 2.51959700  | -2.39975100 | 0.98718600  |
| C | 0.65709500  | -0.97928500 | 0.96628200  |
| C | 1.82260300  | -1.44747100 | 1.77233300  |
| H | 2.47415900  | -0.60433000 | 2.04845400  |
| H | 1.49199900  | -1.95186200 | 2.68087600  |
| N | -0.58060600 | -0.77229700 | 1.28384000  |
| C | -0.30772200 | -0.41923000 | -1.00184200 |
| N | -1.14029900 | -0.42411000 | 0.06556400  |
| C | -2.53053200 | -0.09109400 | 0.02291900  |
| C | -2.96499900 | 1.06087500  | 0.68545700  |
| C | -3.40699900 | -0.92388800 | -0.67610300 |
| C | -4.32252300 | 1.36905500  | 0.63520700  |
| C | -4.75590100 | -0.57016300 | -0.70469600 |
| C | -5.23128900 | 0.56870100  | -0.05752100 |
| H | -4.67748600 | 2.26307000  | 1.14431200  |
| H | -5.45325100 | -1.20778000 | -1.24397300 |
| C | -1.98973000 | 1.94306200  | 1.41912200  |
| H | -1.62147500 | 1.45318900  | 2.32535500  |
| H | -1.11637600 | 2.16098200  | 0.79456800  |
| H | -2.46182400 | 2.88798100  | 1.69860700  |
| C | -2.91123500 | -2.16116800 | -1.37626200 |
| H | -2.25681100 | -1.89719900 | -2.21187000 |
| H | -2.32473900 | -2.78705200 | -0.69558700 |

|   |             |             |             |
|---|-------------|-------------|-------------|
| H | -3.75049100 | -2.75038400 | -1.75354600 |
| C | -6.68892500 | 0.94768400  | -0.12707600 |
| H | -6.85718200 | 1.71107900  | -0.89495900 |
| H | -7.31155300 | 0.08441700  | -0.37632200 |
| H | -7.03829200 | 1.35785700  | 0.82484700  |

## R1

NImag=0

|                                              |             |
|----------------------------------------------|-------------|
| Sum of electronic and zero-point Energies=   | -893.421777 |
| Sum of electronic and thermal Energies=      | -893.405712 |
| Sum of electronic and thermal Enthalpies=    | -893.404768 |
| Sum of electronic and thermal Free Energies= | -893.470010 |

|   |            |             |             |
|---|------------|-------------|-------------|
| C | 3.08653400 | 0.19245500  | -0.34652000 |
| C | 4.17496200 | -0.61551400 | 0.00556500  |
| C | 5.41654000 | -0.03455000 | 0.30620400  |
| C | 5.50183000 | 1.34050400  | 0.24175600  |
| C | 4.38572400 | 2.13829100  | -0.11419900 |
| C | 3.15699700 | 1.58866600  | -0.41853100 |
| H | 6.26305700 | -0.65541700 | 0.57802000  |
| H | 6.44239500 | 1.83164500  | 0.46773600  |
| H | 4.50438600 | 3.21663500  | -0.14863900 |
| H | 2.30049600 | 2.19305300  | -0.69426000 |
| N | 3.77490500 | -1.93675100 | -0.00838900 |
| N | 2.53656600 | -1.98535000 | -0.34111800 |
| N | 2.11781200 | -0.73265100 | -0.56946100 |

|   |             |             |             |
|---|-------------|-------------|-------------|
| O | 0.82169200  | -0.50704700 | -0.90045300 |
| C | -0.00388700 | -0.35574200 | 0.22058000  |
| O | 0.42096400  | -0.34633400 | 1.33221800  |
| C | -1.42724600 | -0.21111000 | -0.23945600 |
| C | -2.38473600 | -0.01775700 | 0.93827700  |
| H | -1.68742900 | -1.10337100 | -0.82101800 |
| H | -1.48189000 | 0.63066300  | -0.94000000 |
| H | -2.28189600 | -0.86635500 | 1.62232200  |
| H | -2.08825100 | 0.87394900  | 1.49977800  |
| C | -3.81041500 | 0.10764000  | 0.45889400  |
| C | -4.36997600 | 1.36006300  | 0.20044000  |
| C | -4.57905000 | -1.03340600 | 0.21902200  |
| C | -5.67033800 | 1.47238700  | -0.28420500 |
| H | -3.78274000 | 2.25596900  | 0.39013100  |
| C | -5.87886800 | -0.92641900 | -0.26611100 |
| H | -4.15435700 | -2.01462700 | 0.42070700  |
| C | -6.42788200 | 0.32833600  | -0.51917000 |
| H | -6.09368600 | 2.45433100  | -0.47296800 |
| H | -6.46470400 | -1.82324000 | -0.44368800 |
| H | -7.44275700 | 0.41401100  | -0.89473900 |

## R2

NImag=0

Sum of electronic and zero-point Energies= -1244.612344

Sum of electronic and thermal Energies= -1244.589679

Sum of electronic and thermal Enthalpies= -1244.588735

Sum of electronic and thermal Free Energies= -1244.664736

|   |             |             |             |
|---|-------------|-------------|-------------|
| C | 1.91342200  | 0.19130300  | -0.46421000 |
| C | 2.92482300  | -0.57987100 | -1.05796900 |
| C | 4.25100100  | -0.17532800 | -1.08145700 |
| C | 4.58445500  | 1.03471000  | -0.48179700 |
| C | 3.58505000  | 1.79371700  | 0.12792200  |
| C | 2.24658300  | 1.39400900  | 0.15095600  |
| C | 0.82689500  | -1.73088100 | -1.08502100 |
| C | 2.31175800  | -1.82094700 | -1.53604300 |
| H | 4.99435700  | -0.81187800 | -1.55191600 |
| H | 5.61119000  | 1.38386200  | -0.47771100 |
| H | 3.84809700  | 2.73296200  | 0.60533100  |
| H | 1.50475200  | 2.02063900  | 0.62518800  |
| O | 2.78412100  | -2.76175500 | -2.11899000 |
| O | 0.04014100  | -2.63995400 | -1.12451900 |
| N | 0.63935600  | -0.43143300 | -0.60233400 |
| C | -0.56832700 | 0.02060900  | 0.14048500  |
| C | -0.29068600 | -0.30016200 | 1.62040100  |
| C | 0.03879000  | 0.66162300  | 2.57491200  |
| C | -0.25126600 | -1.65201500 | 1.99377800  |
| C | 0.38320400  | 0.28743600  | 3.87445500  |
| H | 0.02657400  | 1.71601500  | 2.32018700  |
| C | 0.09199500  | -2.02373000 | 3.28689200  |
| H | -0.49536800 | -2.41402100 | 1.25809200  |

|   |             |             |             |
|---|-------------|-------------|-------------|
| C | 0.40912100  | -1.05279100 | 4.23606400  |
| H | 0.63402400  | 1.05459500  | 4.60077100  |
| H | 0.11201800  | -3.07591200 | 3.55369900  |
| H | 0.67668800  | -1.34217700 | 5.24759900  |
| C | -1.83454100 | -0.67855600 | -0.40150300 |
| C | -2.03879200 | -0.75278800 | -1.78242100 |
| C | -2.85784000 | -1.08411800 | 0.45097100  |
| C | -3.22126100 | -1.26033900 | -2.29802500 |
| H | -1.25828500 | -0.41435200 | -2.45874300 |
| C | -4.05271300 | -1.58519800 | -0.06759000 |
| H | -2.73180700 | -1.01648200 | 1.52657900  |
| C | -4.23719000 | -1.68147800 | -1.43979000 |
| H | -3.35321900 | -1.32594300 | -3.37357500 |
| H | -4.83698900 | -1.90229800 | 0.61307300  |
| H | -5.16460200 | -2.07676900 | -1.84220000 |
| C | -0.86021800 | 1.50150700  | -0.16670000 |
| C | -1.77223100 | 2.20128600  | 0.62951800  |
| C | -0.36679000 | 2.12225800  | -1.31566900 |
| C | -2.13925500 | 3.50503800  | 0.31434300  |
| H | -2.21158000 | 1.71430800  | 1.49571900  |
| C | -0.73626300 | 3.42672400  | -1.63374900 |
| H | 0.31303700  | 1.58696200  | -1.97090500 |
| C | -1.61617700 | 4.12744600  | -0.81628100 |
| H | -2.84454100 | 4.03113000  | 0.95035500  |
| H | -0.33320700 | 3.89130300  | -2.52837400 |

|   |             |            |             |
|---|-------------|------------|-------------|
| H | -1.90202100 | 5.14497600 | -1.06357500 |
|---|-------------|------------|-------------|

### **HOBt**

NImag=0

|                                            |             |
|--------------------------------------------|-------------|
| Sum of electronic and zero-point Energies= | -470.724339 |
|--------------------------------------------|-------------|

|                                         |             |
|-----------------------------------------|-------------|
| Sum of electronic and thermal Energies= | -470.717245 |
|-----------------------------------------|-------------|

|                                           |             |
|-------------------------------------------|-------------|
| Sum of electronic and thermal Enthalpies= | -470.716301 |
|-------------------------------------------|-------------|

|                                              |             |
|----------------------------------------------|-------------|
| Sum of electronic and thermal Free Energies= | -470.755973 |
|----------------------------------------------|-------------|

|   |            |             |             |
|---|------------|-------------|-------------|
| C | 0.15400600 | -0.39754300 | -0.00460700 |
|---|------------|-------------|-------------|

|   |             |            |            |
|---|-------------|------------|------------|
| C | -0.29936400 | 0.92780300 | 0.00061300 |
|---|-------------|------------|------------|

|   |             |            |            |
|---|-------------|------------|------------|
| C | -1.67705700 | 1.20214800 | 0.00968000 |
|---|-------------|------------|------------|

|   |             |            |            |
|---|-------------|------------|------------|
| C | -2.53459100 | 0.12267200 | 0.01004500 |
|---|-------------|------------|------------|

|   |             |             |            |
|---|-------------|-------------|------------|
| C | -2.05217500 | -1.21125000 | 0.00037900 |
|---|-------------|-------------|------------|

|   |             |             |             |
|---|-------------|-------------|-------------|
| C | -0.70434600 | -1.50501100 | -0.00741300 |
|---|-------------|-------------|-------------|

|   |             |            |            |
|---|-------------|------------|------------|
| H | -2.03405800 | 2.22618900 | 0.01510700 |
|---|-------------|------------|------------|

|   |             |            |            |
|---|-------------|------------|------------|
| H | -3.60671800 | 0.28870300 | 0.01591100 |
|---|-------------|------------|------------|

|   |             |             |             |
|---|-------------|-------------|-------------|
| H | -2.76972000 | -2.02576300 | -0.00272700 |
|---|-------------|-------------|-------------|

|   |             |             |             |
|---|-------------|-------------|-------------|
| H | -0.32538300 | -2.52025600 | -0.02082300 |
|---|-------------|-------------|-------------|

|   |            |            |             |
|---|------------|------------|-------------|
| N | 0.79069300 | 1.77208400 | -0.00063000 |
|---|------------|------------|-------------|

|   |            |            |             |
|---|------------|------------|-------------|
| N | 1.85948500 | 1.05625800 | -0.01651600 |
|---|------------|------------|-------------|

|   |            |             |             |
|---|------------|-------------|-------------|
| N | 1.50166400 | -0.23360400 | -0.00510300 |
|---|------------|-------------|-------------|

|   |            |             |             |
|---|------------|-------------|-------------|
| O | 2.43553000 | -1.21640900 | -0.08604200 |
|---|------------|-------------|-------------|

|   |            |             |            |
|---|------------|-------------|------------|
| H | 2.86989800 | -1.23368900 | 0.78442300 |
|---|------------|-------------|------------|

### **OBt<sup>-</sup>**

NImag=0

|                                              |             |
|----------------------------------------------|-------------|
| Sum of electronic and zero-point Energies=   | -470.189965 |
| Sum of electronic and thermal Energies=      | -470.183479 |
| Sum of electronic and thermal Enthalpies=    | -470.182535 |
| Sum of electronic and thermal Free Energies= | -470.221080 |

|   |             |             |             |
|---|-------------|-------------|-------------|
| C | -0.19861700 | 0.39237300  | 0.00000800  |
| C | 0.22475800  | -0.95222500 | -0.00002100 |
| C | 1.61131700  | -1.22857700 | -0.00000700 |
| C | 2.48590500  | -0.16287200 | -0.00000200 |
| C | 2.02915500  | 1.18694700  | -0.00000200 |
| C | 0.68146400  | 1.48043800  | 0.00000800  |
| H | 1.96743100  | -2.25558700 | -0.00000100 |
| H | 3.55750900  | -0.35015000 | 0.00000500  |
| H | 2.76050100  | 1.99140800  | -0.00000600 |
| H | 0.29035300  | 2.49316700  | 0.00001200  |
| N | -0.86572200 | -1.75128900 | -0.00001800 |
| N | -1.93650600 | -0.95705800 | 0.00000900  |
| N | -1.56236000 | 0.32110400  | 0.00009000  |
| O | -2.37844600 | 1.31692100  | -0.00006000 |

### **HCO<sub>3</sub><sup>-</sup>**

NImag=0

|                                              |             |
|----------------------------------------------|-------------|
| Sum of electronic and zero-point Energies=   | -264.302157 |
| Sum of electronic and thermal Energies=      | -264.298691 |
| Sum of electronic and thermal Enthalpies=    | -264.297747 |
| Sum of electronic and thermal Free Energies= | -264.327892 |



|   |             |             |             |
|---|-------------|-------------|-------------|
| H | 1.70577200  | -0.19230600 | 0.00002300  |
| C | -0.15172900 | 0.07432200  | -0.00000200 |
| O | -1.24932900 | -0.49122900 | -0.00001400 |
| O | 0.18025000  | 1.27922700  | 0.00000100  |
| O | 0.96965400  | -0.81970100 | 0.00001100  |

### H<sub>2</sub>CO<sub>3</sub>

NImag=0

|                                              |             |
|----------------------------------------------|-------------|
| Sum of electronic and zero-point Energies=   | -264.835367 |
| Sum of electronic and thermal Energies=      | -264.831386 |
| Sum of electronic and thermal Enthalpies=    | -264.830442 |
| Sum of electronic and thermal Free Energies= | -264.861465 |

|   |             |             |             |
|---|-------------|-------------|-------------|
| C | 0.16924700  | -0.00001900 | 0.00000200  |
| O | 1.35723800  | -0.00035200 | 0.00001500  |
| O | -0.55960100 | 1.14136800  | 0.03326100  |
| H | -1.45721500 | 1.00603400  | -0.30202900 |
| O | -0.56021400 | -1.14107700 | -0.03331600 |
| H | -1.45764900 | -1.00542500 | 0.30233700  |

### TS1

NImag= (-90.4830 )

|                                              |              |
|----------------------------------------------|--------------|
| Sum of electronic and zero-point Energies=   | -1944.939745 |
| Sum of electronic and thermal Energies=      | -1944.902246 |
| Sum of electronic and thermal Enthalpies=    | -1944.901302 |
| Sum of electronic and thermal Free Energies= | -1945.013385 |

|   |              |             |              |
|---|--------------|-------------|--------------|
| C | 2. 00599700  | 3. 00133100 | -0. 73862300 |
| C | 3. 13578400  | 2. 73326200 | -1. 52225100 |
| C | 4. 32211500  | 3. 46383600 | -1. 32803600 |
| C | 4. 30989200  | 4. 43231200 | -0. 34898400 |
| C | 3. 15435800  | 4. 68182600 | 0. 43868500  |
| C | 1. 98338300  | 3. 97660700 | 0. 26830300  |
| H | 5. 19843200  | 3. 26303200 | -1. 93481200 |
| H | 5. 20238500  | 5. 02119300 | -0. 16482700 |
| H | 3. 20224000  | 5. 44882600 | 1. 20503500  |
| H | 1. 10342500  | 4. 13735400 | 0. 87919300  |
| N | 2. 83496000  | 1. 71782300 | -2. 40400800 |
| N | 1. 61186800  | 1. 35867400 | -2. 20881200 |
| N | 1. 10222700  | 2. 11284100 | -1. 22778700 |
| O | -0. 17633500 | 1. 92021100 | -0. 84536200 |
| C | -0. 26732000 | 1. 19669000 | 0. 40443000  |
| O | 0. 59718800  | 1. 33350500 | 1. 23698200  |
| C | -1. 73096700 | 0. 93695900 | 0. 65307300  |
| C | -2. 42524800 | 2. 16640900 | 1. 26152300  |
| H | -1. 80313400 | 0. 08903300 | 1. 34079000  |
| H | -2. 22143700 | 0. 65720100 | -0. 28207700 |
| H | -1. 94454900 | 2. 42592500 | 2. 21034700  |
| H | -2. 30127400 | 3. 02015000 | 0. 58500300  |
| C | -3. 89217600 | 1. 87612000 | 1. 46931000  |
| C | -4. 75798200 | 1. 82272700 | 0. 37247700  |

|   |             |             |             |
|---|-------------|-------------|-------------|
| C | -4.40173600 | 1.59655700  | 2.73768000  |
| C | -6.10291900 | 1.51194400  | 0.54235600  |
| H | -4.37084000 | 2.02909400  | -0.62339000 |
| C | -5.74670100 | 1.27696600  | 2.91179400  |
| H | -3.73718900 | 1.63183200  | 3.59765600  |
| C | -6.60169500 | 1.23514300  | 1.81449800  |
| H | -6.76481300 | 1.48865200  | -0.31854500 |
| H | -6.12674900 | 1.06554800  | 3.90678700  |
| H | -7.65189000 | 0.99435700  | 1.94871600  |
| C | 4.02091000  | -2.14806700 | 3.80398100  |
| C | 4.85689600  | -2.11484800 | 2.68954200  |
| C | 4.35183000  | -1.63450100 | 1.48454200  |
| C | 2.19352500  | -1.21424900 | 2.51776900  |
| C | 2.70088500  | -1.69818900 | 3.72130300  |
| H | 4.40037600  | -2.52599700 | 4.74856200  |
| H | 5.88369400  | -2.46297700 | 2.76045300  |
| H | 1.17700600  | -0.83732200 | 2.43858600  |
| H | 2.06832000  | -1.72355500 | 4.60312100  |
| C | 3.03196500  | -1.19798400 | 1.40923700  |
| C | 2.69395000  | -0.73217900 | 0.01014400  |
| C | 3.90892500  | -1.20959400 | -0.86167000 |
| H | 2.58505600  | 0.35431000  | -0.02403700 |
| C | 5.04576600  | -1.47313200 | 0.15355300  |
| H | 4.16675600  | -0.44215700 | -1.59293900 |
| H | 5.62473700  | -2.34965600 | -0.15371200 |

|   |             |             |             |
|---|-------------|-------------|-------------|
| H | 5.73401700  | -0.61992100 | 0.18033900  |
| N | 1.45316300  | -1.31981000 | -0.47205800 |
| O | 3.63145600  | -2.36220900 | -1.64677800 |
| C | 1.42711400  | -2.61278600 | -0.92326200 |
| C | 2.74251900  | -3.30240700 | -1.07379100 |
| H | 3.10840300  | -3.66989600 | -0.10399700 |
| H | 2.66008500  | -4.14035400 | -1.76646700 |
| N | 0.22313500  | -2.96992400 | -1.25125100 |
| C | 0.20236200  | -0.79670700 | -0.50035200 |
| N | -0.50674400 | -1.83385600 | -0.97439300 |
| C | -1.92590300 | -1.80711300 | -1.15969200 |
| C | -2.73275900 | -2.39194400 | -0.18002500 |
| C | -2.44401300 | -1.10094600 | -2.24568700 |
| C | -4.11083300 | -2.23842100 | -0.30110500 |
| C | -3.83225400 | -0.97533100 | -2.32570000 |
| C | -4.67626600 | -1.53032400 | -1.36407800 |
| H | -4.75936300 | -2.66676000 | 0.45989100  |
| H | -4.26172900 | -0.42238700 | -3.15830200 |
| C | -2.11162600 | -3.12454200 | 0.97928500  |
| H | -1.56682300 | -4.00926900 | 0.63566500  |
| H | -1.38795500 | -2.48781100 | 1.50226900  |
| H | -2.87534100 | -3.43861000 | 1.69392200  |
| C | -1.52874800 | -0.45739500 | -3.25337400 |
| H | -0.98370500 | 0.38352200  | -2.80997600 |
| H | -0.77685300 | -1.16708300 | -3.61184500 |

|   |             |             |             |
|---|-------------|-------------|-------------|
| H | -2.09849700 | -0.09043900 | -4.11013000 |
| C | -6.17300100 | -1.39243700 | -1.47201100 |
| H | -6.44791000 | -0.57570700 | -2.14521600 |
| H | -6.62176900 | -2.31225700 | -1.86312800 |
| H | -6.61802600 | -1.19373000 | -0.49257100 |

### TS1-1

NImag=1 (-139.7419)

|                                              |              |
|----------------------------------------------|--------------|
| Sum of electronic and zero-point Energies=   | -1944.935105 |
| Sum of electronic and thermal Energies=      | -1944.897826 |
| Sum of electronic and thermal Enthalpies=    | -1944.896882 |
| Sum of electronic and thermal Free Energies= | -1945.007735 |

|   |            |            |             |
|---|------------|------------|-------------|
| C | 2.03597000 | 1.73195700 | -2.33733600 |
| C | 3.10580900 | 2.33412900 | -1.66131900 |
| C | 4.35185500 | 2.48045500 | -2.29817900 |
| C | 4.45887600 | 2.00734000 | -3.58741100 |
| C | 3.36279100 | 1.39224500 | -4.24896700 |
| C | 2.13453600 | 1.23673100 | -3.64485500 |
| H | 5.18228700 | 2.94999900 | -1.78150500 |
| H | 5.40186400 | 2.09846400 | -4.11643600 |
| H | 3.50450400 | 1.02546700 | -5.26057700 |
| H | 1.29841300 | 0.74391600 | -4.12549900 |
| N | 2.69264000 | 2.68313000 | -0.39427000 |
| N | 1.45550300 | 2.33987300 | -0.26733300 |
| N | 1.04828900 | 1.77749700 | -1.40636700 |

|   |             |             |             |
|---|-------------|-------------|-------------|
| O | -0.23467400 | 1.38232600  | -1.51933700 |
| C | -0.37255300 | -0.05487800 | -1.41531600 |
| O | 0.53824900  | -0.76915700 | -1.79539500 |
| C | -1.84150400 | -0.33552000 | -1.64431200 |
| C | -2.17816900 | -1.80139900 | -1.37308600 |
| H | -2.03367400 | -0.09978700 | -2.69945100 |
| H | -2.44650300 | 0.34729000  | -1.04440900 |
| H | -1.52393500 | -2.42109200 | -1.99763200 |
| H | -1.94100200 | -2.04194500 | -0.32863300 |
| C | -3.62874200 | -2.11604300 | -1.65215100 |
| C | -4.51816400 | -2.41185100 | -0.61768200 |
| C | -4.11523000 | -2.09779600 | -2.96321600 |
| C | -5.86068900 | -2.67603400 | -0.88145400 |
| H | -4.15323500 | -2.44246100 | 0.40637100  |
| C | -5.45392000 | -2.36133500 | -3.23223900 |
| H | -3.43245500 | -1.88063500 | -3.78192600 |
| C | -6.33297100 | -2.64954000 | -2.18981000 |
| H | -6.53580900 | -2.90580500 | -0.06262100 |
| H | -5.81203600 | -2.34555700 | -4.25721400 |
| H | -7.37806400 | -2.85622700 | -2.39828100 |
| C | 5.37232000  | -1.67837300 | 0.58392800  |
| C | 4.80172700  | -2.85343900 | 1.06989500  |
| C | 3.41585700  | -2.98507800 | 1.05108900  |
| C | 3.18781200  | -0.78106900 | 0.05768100  |
| C | 4.57287900  | -0.64805000 | 0.08202900  |

|   |             |             |             |
|---|-------------|-------------|-------------|
| H | 6.45165700  | -1.56074300 | 0.59952800  |
| H | 5.42865400  | -3.64894100 | 1.46327500  |
| H | 2.55088100  | 0.00649100  | -0.33034300 |
| H | 5.02826900  | 0.26324500  | -0.29347900 |
| C | 2.62817500  | -1.95433500 | 0.54765400  |
| C | 1.15803000  | -2.29682400 | 0.63191500  |
| C | 1.11376600  | -3.59212900 | 1.52106300  |
| H | 0.73397300  | -2.47138200 | -0.35816500 |
| C | 2.56097900  | -4.14204400 | 1.50717900  |
| H | 0.40451500  | -4.31100000 | 1.10735100  |
| H | 2.82232400  | -4.51968500 | 2.50112700  |
| H | 2.64022600  | -4.98434400 | 0.81003300  |
| N | 0.39505500  | -1.21487900 | 1.25119900  |
| O | 0.64244200  | -3.36672600 | 2.84155600  |
| C | 0.41143500  | -1.05708800 | 2.61187500  |
| C | 1.04633200  | -2.13879000 | 3.42015300  |
| H | 2.14084000  | -2.03532300 | 3.42801800  |
| H | 0.67632500  | -2.11872400 | 4.44545300  |
| N | -0.24914400 | -0.00006800 | 2.96800200  |
| C | -0.29307800 | -0.18879600 | 0.68535100  |
| N | -0.66568200 | 0.51937500  | 1.76471300  |
| C | -1.41627000 | 1.74117600  | 1.75439000  |
| C | -0.75303600 | 2.92895700  | 2.08890000  |
| C | -2.77992600 | 1.70230200  | 1.44982100  |
| C | -1.48473900 | 4.11158700  | 2.01865200  |

|   |             |             |            |
|---|-------------|-------------|------------|
| C | -3.46374500 | 2.91745700  | 1.38709400 |
| C | -2.83073200 | 4.12925700  | 1.65011600 |
| H | -0.98556500 | 5.04758400  | 2.26031400 |
| H | -4.52338100 | 2.90885000  | 1.13992500 |
| C | 0.67038500  | 2.94596600  | 2.58146200 |
| H | 0.68223100  | 2.90142100  | 3.67626400 |
| H | 1.25010000  | 2.10648500  | 2.19969500 |
| H | 1.17093500  | 3.86415800  | 2.26481800 |
| C | -3.54553700 | 0.41211800  | 1.28653300 |
| H | -4.23392100 | 0.45907600  | 0.43711400 |
| H | -2.88840300 | -0.44710600 | 1.14146000 |
| H | -4.14476600 | 0.22311000  | 2.18423200 |
| C | -3.57662000 | 5.43390400  | 1.53502600 |
| H | -4.65557100 | 5.28458500  | 1.62724100 |
| H | -3.26036700 | 6.14034000  | 2.30759600 |
| H | -3.38752200 | 5.90322200  | 0.56332400 |

## IM01

NImag=0

|                                              |              |
|----------------------------------------------|--------------|
| Sum of electronic and zero-point Energies=   | -1944.953492 |
| Sum of electronic and thermal Energies=      | -1944.915739 |
| Sum of electronic and thermal Enthalpies=    | -1944.914795 |
| Sum of electronic and thermal Free Energies= | -1945.026344 |

|   |            |            |             |
|---|------------|------------|-------------|
| C | 1.56537900 | 2.79095300 | -1.19670800 |
| C | 2.78795300 | 2.64413000 | -1.86616000 |



|   |             |             |             |
|---|-------------|-------------|-------------|
| C | 3.79958500  | 3.61271900  | -1.71203000 |
| C | 3.52632300  | 4.67958600  | -0.88674500 |
| C | 2.28215700  | 4.80076000  | -0.20709200 |
| C | 1.28106900  | 3.86615100  | -0.34071800 |
| H | 4.74643400  | 3.50966900  | -2.23145400 |
| H | 4.27643800  | 5.44992100  | -0.73929600 |
| H | 2.12714500  | 5.65403200  | 0.44562500  |
| H | 0.34212200  | 3.92009400  | 0.19676200  |
| N | 2.75535700  | 1.47980900  | -2.59485900 |
| N | 1.59876800  | 0.92358100  | -2.41401600 |
| N | 0.87116900  | 1.69596500  | -1.59850200 |
| O | -0.36191800 | 1.33499900  | -1.23869800 |
| C | -0.30535200 | 0.57089700  | 0.23198900  |
| O | 0.49874600  | 1.11499700  | 1.03209100  |
| C | -1.80491900 | 0.59699200  | 0.54288000  |
| C | -2.22287900 | 1.98353400  | 1.03731600  |
| H | -2.00891300 | -0.14374200 | 1.32717300  |
| H | -2.40015200 | 0.32124000  | -0.33145200 |
| H | -1.59367800 | 2.26033200  | 1.88780400  |
| H | -2.02937300 | 2.70665600  | 0.23675200  |
| C | -3.68373800 | 1.99804700  | 1.41651300  |
| C | -4.67190300 | 1.90853900  | 0.42984400  |
| C | -4.08332100 | 2.05157900  | 2.75251900  |
| C | -6.02040700 | 1.87814400  | 0.76946100  |
| H | -4.37480500 | 1.86588800  | -0.61623100 |

|   |             |             |             |
|---|-------------|-------------|-------------|
| C | -5.43282600 | 2.02041300  | 3.09876800  |
| H | -3.32576400 | 2.12161900  | 3.52939800  |
| C | -6.40592400 | 1.93327500  | 2.10808400  |
| H | -6.77346200 | 1.81825900  | -0.01128600 |
| H | -5.72304200 | 2.06735000  | 4.14427700  |
| H | -7.45809200 | 1.91275300  | 2.37512500  |
| C | 4.07162400  | -1.68920200 | 4.07661600  |
| C | 4.91029900  | -1.68005300 | 2.96477100  |
| C | 4.40209500  | -1.24844500 | 1.74209300  |
| C | 2.23545300  | -0.81957900 | 2.75632600  |
| C | 2.74636900  | -1.25772600 | 3.97506200  |
| H | 4.45380200  | -2.02840700 | 5.03470000  |
| H | 5.94323800  | -2.00589900 | 3.05028100  |
| H | 1.22224900  | -0.44020000 | 2.65746100  |
| H | 2.11319000  | -1.25615300 | 4.85682400  |
| C | 3.07594200  | -0.83584200 | 1.64726000  |
| C | 2.73333300  | -0.42640400 | 0.23253400  |
| C | 3.99424400  | -0.83641300 | -0.62004200 |
| H | 2.51965500  | 0.64005800  | 0.16212600  |
| C | 5.10922800  | -1.11551700 | 0.41716100  |
| H | 4.24625600  | -0.02685300 | -1.30390000 |
| H | 5.67181200  | -2.00898300 | 0.12603700  |
| H | 5.82048200  | -0.28232800 | 0.44105200  |
| N | 1.53514500  | -1.14408600 | -0.23851800 |
| O | 3.78417300  | -1.95065900 | -1.47469600 |

|   |             |             |             |
|---|-------------|-------------|-------------|
| C | 1.63655200  | -2.41376800 | -0.73127500 |
| C | 3.00498100  | -2.97999200 | -0.91144300 |
| H | 3.41391300  | -3.33111000 | 0.04767500  |
| H | 2.97694400  | -3.81024500 | -1.61758400 |
| N | 0.47606900  | -2.89024100 | -1.07246200 |
| C | 0.23366600  | -0.80407800 | -0.27080200 |
| N | -0.38604600 | -1.87364800 | -0.77680300 |
| C | -1.79371700 | -2.03776400 | -1.01588900 |
| C | -2.56687100 | -2.60323000 | 0.00015900  |
| C | -2.31576400 | -1.59218400 | -2.22956000 |
| C | -3.94203800 | -2.65502800 | -0.20216500 |
| C | -3.70089700 | -1.66892300 | -2.38240700 |
| C | -4.52574000 | -2.17091600 | -1.37593000 |
| H | -4.57502200 | -3.07085500 | 0.57809200  |
| H | -4.14403100 | -1.31733400 | -3.31100500 |
| C | -1.92549400 | -3.12127700 | 1.26049100  |
| H | -1.22377000 | -3.93085200 | 1.03488000  |
| H | -1.36023600 | -2.33704700 | 1.77754900  |
| H | -2.68245400 | -3.50139500 | 1.94922100  |
| C | -1.42269000 | -1.03045100 | -3.30239100 |
| H | -0.99738200 | -0.07085100 | -2.99111300 |
| H | -0.58456800 | -1.70354400 | -3.50854100 |
| H | -1.98478800 | -0.88344600 | -4.22700100 |
| C | -6.02406100 | -2.17169400 | -1.53356300 |
| H | -6.31456000 | -2.08341500 | -2.58323100 |

|   |             |             |             |
|---|-------------|-------------|-------------|
| H | -6.46575400 | -3.08663200 | -1.12910500 |
| H | -6.46134900 | -1.32632200 | -0.99063100 |

### IM01-1

NImag=0

|                                              |              |
|----------------------------------------------|--------------|
| Sum of electronic and zero-point Energies=   | -1944.945089 |
| Sum of electronic and thermal Energies=      | -1944.907476 |
| Sum of electronic and thermal Enthalpies=    | -1944.906532 |
| Sum of electronic and thermal Free Energies= | -1945.018621 |

|   |             |            |             |
|---|-------------|------------|-------------|
| C | 1.09868600  | 3.36585000 | -0.78551300 |
| C | 2.41670700  | 3.74795400 | -0.50379800 |
| C | 3.06036200  | 4.70963900 | -1.30408500 |
| C | 2.34193400  | 5.23989500 | -2.35252100 |
| C | 1.00582500  | 4.83713900 | -2.62046400 |
| C | 0.35697700  | 3.89883000 | -1.84894200 |
| H | 4.08042500  | 5.01082800 | -1.09120000 |
| H | 2.80058500  | 5.98332300 | -2.99644700 |
| H | 0.48582700  | 5.28423600 | -3.46197700 |
| H | -0.66089800 | 3.58143100 | -2.04273700 |
| N | 2.85621600  | 3.04118900 | 0.58968500  |
| N | 1.89087700  | 2.27152200 | 0.97743000  |
| N | 0.83069100  | 2.46538900 | 0.19146100  |
| O | -0.28174000 | 1.74424900 | 0.34379800  |
| C | -0.18881300 | 0.41924100 | -0.58984200 |
| O | 0.76627900  | 0.45023400 | -1.41214800 |

|   |             |             |             |
|---|-------------|-------------|-------------|
| C | -1.61738700 | 0.36224700  | -1.14042300 |
| C | -1.79215000 | -0.88766200 | -2.00880800 |
| H | -1.72743400 | 1.26191500  | -1.75383400 |
| H | -2.36316800 | 0.41845200  | -0.34102200 |
| H | -1.01377900 | -0.85436300 | -2.78065600 |
| H | -1.60462500 | -1.79120900 | -1.41007200 |
| C | -3.15755700 | -0.99455700 | -2.64560600 |
| C | -3.99101300 | -2.08684100 | -2.39599500 |
| C | -3.61618700 | 0.00520200  | -3.51026500 |
| C | -5.25109700 | -2.17880600 | -2.98445600 |
| H | -3.64415100 | -2.87966500 | -1.73641100 |
| C | -4.87191900 | -0.08189600 | -4.10071700 |
| H | -2.97602100 | 0.85667500  | -3.72835700 |
| C | -5.69651600 | -1.17462100 | -3.83744000 |
| H | -5.88193000 | -3.03797400 | -2.77682100 |
| H | -5.20803100 | 0.70340000  | -4.77114000 |
| H | -6.67708500 | -1.24268500 | -4.29810400 |
| C | 5.90028800  | -1.02976700 | -0.05075900 |
| C | 5.50703100  | -2.33388700 | -0.34701800 |
| C | 4.15582900  | -2.59638900 | -0.55710500 |
| C | 3.61341200  | -0.25386100 | -0.20681400 |
| C | 4.96248500  | 0.00427500  | 0.01563800  |
| H | 6.95021600  | -0.81506800 | 0.12476100  |
| H | 6.24244700  | -3.13121900 | -0.41027800 |
| H | 2.87171900  | 0.53464200  | -0.18766900 |

|   |             |             |             |
|---|-------------|-------------|-------------|
| H | 5.27423300  | 1.01965400  | 0.23940700  |
| C | 3.22884500  | -1.56201600 | -0.47111700 |
| C | 1.82458900  | -2.05858300 | -0.71837500 |
| C | 1.96877600  | -3.62768400 | -0.78967900 |
| H | 1.39928100  | -1.63208700 | -1.62628300 |
| C | 3.48748000  | -3.89741300 | -0.92319700 |
| H | 1.41114100  | -4.01168200 | -1.64488000 |
| H | 3.76910000  | -4.73801900 | -0.27978900 |
| H | 3.73272500  | -4.18611900 | -1.95140900 |
| N | 0.91377000  | -1.68205800 | 0.38123100  |
| O | 1.40825300  | -4.31567900 | 0.31984000  |
| C | 0.86515200  | -2.42046600 | 1.53059800  |
| C | 1.64710700  | -3.68988000 | 1.56492300  |
| H | 2.71641800  | -3.49565000 | 1.72805600  |
| H | 1.27123200  | -4.34460300 | 2.35119600  |
| N | -0.00846500 | -1.94567400 | 2.36672600  |
| C | 0.03645900  | -0.66838800 | 0.51817500  |
| N | -0.51567900 | -0.85272400 | 1.72164600  |
| C | -1.59364700 | -0.12617800 | 2.34693800  |
| C | -1.26822900 | 0.86810900  | 3.27734800  |
| C | -2.90497400 | -0.51160400 | 2.07136900  |
| C | -2.32351100 | 1.54437900  | 3.87750800  |
| C | -3.92745800 | 0.20321800  | 2.70109200  |
| C | -3.65708600 | 1.23944700  | 3.58842200  |
| H | -2.09913600 | 2.32763000  | 4.59776600  |

|   |             |             |            |
|---|-------------|-------------|------------|
| H | -4.95934200 | -0.07158300 | 2.49411200 |
| C | 0.16155800  | 1.15039200  | 3.63950000 |
| H | 0.62653200  | 0.26062800  | 4.07859800 |
| H | 0.74917900  | 1.43590000  | 2.76264700 |
| H | 0.21724900  | 1.95984500  | 4.37047400 |
| C | -3.25186200 | -1.65803600 | 1.15571400 |
| H | -2.38134600 | -2.26957100 | 0.90375100 |
| H | -3.98586000 | -2.30935000 | 1.63885400 |
| H | -3.69732800 | -1.29910600 | 0.22131000 |
| C | -4.77224800 | 2.02050600  | 4.23394700 |
| H | -5.73088600 | 1.50661700  | 4.12923100 |
| H | -4.57975900 | 2.17573200  | 5.29944800 |
| H | -4.86880800 | 3.00836500  | 3.77091600 |

## IM1

NImag=0

|                                              |              |
|----------------------------------------------|--------------|
| Sum of electronic and zero-point Energies=   | -1474.592053 |
| Sum of electronic and thermal Energies=      | -1474.561474 |
| Sum of electronic and thermal Enthalpies=    | -1474.560530 |
| Sum of electronic and thermal Free Energies= | -1474.658233 |

|   |             |            |             |
|---|-------------|------------|-------------|
| C | -0.10125900 | 1.15840700 | -0.11237800 |
| O | 0.55275900  | 2.14548200 | 0.12781500  |
| C | -1.60054700 | 1.12943100 | -0.21777100 |
| C | -2.22294500 | 2.52814300 | -0.18320400 |
| H | -2.00110200 | 0.52039400 | 0.60400500  |

|   |             |            |             |
|---|-------------|------------|-------------|
| H | -1.88494600 | 0.59009800 | -1.13254200 |
| H | -1.92043700 | 3.03205400 | 0.74025600  |
| H | -1.83271600 | 3.12607900 | -1.01274600 |
| C | -3.72720900 | 2.41652700 | -0.26627900 |
| C | -4.39100700 | 2.59037800 | -1.48092600 |
| C | -4.47006300 | 2.07895200 | 0.86799700  |
| C | -5.77276800 | 2.43443600 | -1.56218700 |
| H | -3.82400700 | 2.86196600 | -2.36836400 |
| C | -5.85011400 | 1.92088500 | 0.79064600  |
| H | -3.96371100 | 1.95390800 | 1.82340000  |
| C | -6.50450400 | 2.09788300 | -0.42694200 |
| H | -6.27787600 | 2.58321800 | -2.51125600 |
| H | -6.41719900 | 1.67242600 | 1.68238100  |
| H | -7.58189900 | 1.98322700 | -0.48766900 |
| C | 5.61318700  | 1.13322700 | 2.49181600  |
| C | 6.08919600  | 0.95480500 | 1.19572000  |
| C | 5.17596600  | 0.88616300 | 0.14652600  |
| C | 3.32798100  | 1.18673000 | 1.69732600  |
| C | 4.24315900  | 1.24968700 | 2.74325900  |
| H | 6.31466100  | 1.18494000 | 3.31808600  |
| H | 7.15502300  | 0.86836700 | 1.00726100  |
| H | 2.26291300  | 1.29421900 | 1.88399600  |
| H | 3.89313500  | 1.39644700 | 3.75954200  |
| C | 3.81294400  | 1.00040300 | 0.40611400  |
| C | 3.01108100  | 0.88909800 | -0.87042400 |



|   |             |             |             |
|---|-------------|-------------|-------------|
| C | 4.06202000  | 0.47023200  | -1.97098900 |
| H | 2.49733700  | 1.81431900  | -1.13082000 |
| C | 5.44560100  | 0.71742600  | -1.32677200 |
| H | 3.91576700  | 1.07075700  | -2.86876000 |
| H | 6.11667600  | -0.11624700 | -1.55832400 |
| H | 5.90310800  | 1.61942700  | -1.74660800 |
| N | 1.97893700  | -0.16146900 | -0.73087400 |
| O | 3.89993500  | -0.86353000 | -2.42175900 |
| C | 2.30204600  | -1.48118300 | -0.86764400 |
| C | 3.66151400  | -1.80498200 | -1.39886000 |
| H | 4.41527600  | -1.75710500 | -0.60055100 |
| H | 3.66645200  | -2.80048300 | -1.84294300 |
| N | 1.27979500  | -2.24977000 | -0.60203900 |
| C | 0.68639100  | -0.11654900 | -0.36376500 |
| N | 0.28556800  | -1.38668100 | -0.28756200 |
| C | -1.00249200 | -1.86924500 | 0.14560000  |
| C | -1.29437700 | -1.80939300 | 1.50963700  |
| C | -1.89208900 | -2.33335900 | -0.82565500 |
| C | -2.57221200 | -2.20880100 | 1.89555000  |
| C | -3.15461200 | -2.71819100 | -0.38339100 |
| C | -3.51656700 | -2.64964300 | 0.96502700  |
| H | -2.83643500 | -2.17546600 | 2.94937200  |
| H | -3.87770900 | -3.07645200 | -1.11142100 |
| C | -0.29128600 | -1.29822500 | 2.51254100  |
| H | 0.71385100  | -1.68517400 | 2.31695400  |

|   |             |             |             |
|---|-------------|-------------|-------------|
| H | -0.23666400 | -0.20115000 | 2.50573100  |
| H | -0.57691500 | -1.59865200 | 3.52208500  |
| C | -1.49939400 | -2.40462300 | -2.27766500 |
| H | -1.12535200 | -1.44135700 | -2.64457700 |
| H | -0.70716600 | -3.14359900 | -2.43291500 |
| H | -2.35537100 | -2.68665000 | -2.89245600 |
| C | -4.90874200 | -3.02100600 | 1.39991600  |
| H | -5.30426600 | -3.84508800 | 0.80143400  |
| H | -4.93312900 | -3.31405500 | 2.45174100  |
| H | -5.58233400 | -2.16622300 | 1.27363400  |

## TS2

NImag=1 (-975.9149)

|                                              |              |
|----------------------------------------------|--------------|
| Sum of electronic and zero-point Energies=   | -1944.936977 |
| Sum of electronic and thermal Energies=      | -1944.900622 |
| Sum of electronic and thermal Enthalpies=    | -1944.899678 |
| Sum of electronic and thermal Free Energies= | -1945.006171 |

|   |             |            |             |
|---|-------------|------------|-------------|
| C | 0.24108900  | 0.50453600 | -0.63373200 |
| O | -0.65957900 | 0.28423000 | -1.44965100 |
| C | 1.40817700  | 1.30634900 | -0.83399000 |
| C | 1.80871600  | 1.43957900 | -2.30055900 |
| H | 2.24904500  | 1.06573400 | -0.18716000 |
| H | 1.06983200  | 2.52725000 | -0.30766000 |
| H | 0.93577600  | 1.72416200 | -2.89513100 |
| H | 2.56020200  | 2.22858200 | -2.40683100 |
| C | 2.36341400  | 0.11561400 | -2.77724200 |

|   |             |             |             |
|---|-------------|-------------|-------------|
| C | 3.68639400  | -0.23967100 | -2.49194400 |
| C | 1.53853500  | -0.82917000 | -3.39760200 |
| C | 4.17438300  | -1.50288800 | -2.81389500 |
| H | 4.33528900  | 0.48301700  | -2.00038900 |
| C | 2.02296300  | -2.09742300 | -3.71412200 |
| H | 0.50784000  | -0.56495300 | -3.61630000 |
| C | 3.34154600  | -2.43983800 | -3.42337600 |
| H | 5.20752700  | -1.75622400 | -2.59085500 |
| H | 1.36770500  | -2.81785500 | -4.19634200 |
| H | 3.71956900  | -3.42615900 | -3.67547200 |
| C | -3.01258300 | -4.70860500 | -1.21492300 |
| C | -3.95001500 | -4.11678600 | -0.37136700 |
| C | -3.69897200 | -2.83976500 | 0.12402700  |
| C | -1.59013600 | -2.75337900 | -1.08166200 |
| C | -1.84213300 | -4.03264700 | -1.56887500 |
| H | -3.19381900 | -5.70624000 | -1.60342800 |
| H | -4.85920900 | -4.64670200 | -0.10109600 |
| H | -0.69496500 | -2.20722100 | -1.36901100 |
| H | -1.12568400 | -4.50560100 | -2.23351100 |
| C | -2.52762000 | -2.17590100 | -0.23069700 |
| C | -2.45892000 | -0.81533300 | 0.42457100  |
| C | -3.64534500 | -0.80142500 | 1.45146000  |
| H | -2.54565400 | -0.00035600 | -0.29021700 |
| C | -4.55126800 | -1.98582800 | 1.03148000  |
| H | -4.14711300 | 0.16382100  | 1.39832900  |

|   |             |             |             |
|---|-------------|-------------|-------------|
| H | -4.90909100 | -2.51375300 | 1.92186100  |
| H | -5.43589300 | -1.61783200 | 0.49931300  |
| N | -1.17237100 | -0.65429400 | 1.11762200  |
| O | -3.24334500 | -0.90207200 | 2.80973500  |
| C | -0.97922700 | -1.20396400 | 2.34971000  |
| C | -2.16761300 | -1.77900300 | 3.04642100  |
| H | -2.37361500 | -2.79639900 | 2.68056900  |
| H | -1.99044000 | -1.81479900 | 4.12185900  |
| N | 0.25356900  | -1.07184900 | 2.74591500  |
| C | 0.00612800  | -0.13966700 | 0.72442100  |
| N | 0.85660800  | -0.41550400 | 1.71527700  |
| C | 2.28139900  | -0.21844800 | 1.74820100  |
| C | 3.07386400  | -1.11484900 | 1.02902400  |
| C | 2.78338100  | 0.87071500  | 2.46044500  |
| C | 4.44961900  | -0.89446900 | 1.04778700  |
| C | 4.16660400  | 1.03897100  | 2.45163500  |
| C | 5.00939600  | 0.17285600  | 1.75208700  |
| H | 5.09520100  | -1.56826700 | 0.48882700  |
| H | 4.59493500  | 1.87840300  | 2.99449100  |
| C | 2.45937200  | -2.21355800 | 0.20332600  |
| H | 1.67747200  | -2.74729100 | 0.75448900  |
| H | 2.01501800  | -1.80072400 | -0.71408900 |
| H | 3.21968200  | -2.93302400 | -0.10758400 |
| C | 1.85796300  | 1.84755300  | 3.13316100  |
| H | 1.30537000  | 2.42773100  | 2.38267200  |

|   |             |             |             |
|---|-------------|-------------|-------------|
| H | 1.12201600  | 1.33582600  | 3.76034600  |
| H | 2.42522700  | 2.54209300  | 3.75644500  |
| C | 6.49755400  | 0.41131400  | 1.72820800  |
| H | 6.75914700  | 1.13867400  | 0.95154900  |
| H | 6.85031700  | 0.80962100  | 2.68325600  |
| H | 7.04445900  | -0.51112100 | 1.51718100  |
| C | -1.60734900 | 3.58473000  | -0.64306500 |
| C | -2.74643700 | 2.89821700  | -0.20308700 |
| C | -3.95356000 | 3.01063500  | -0.92015700 |
| C | -3.94510100 | 3.79838300  | -2.04971200 |
| C | -2.77357100 | 4.47880100  | -2.48171700 |
| C | -1.58552600 | 4.39000900  | -1.79115100 |
| H | -4.84897100 | 2.49512100  | -0.58688100 |
| H | -4.85477000 | 3.90849900  | -2.63170100 |
| H | -2.82298900 | 5.08401000  | -3.38146700 |
| H | -0.68041300 | 4.90117700  | -2.09880500 |
| N | -2.42049800 | 2.18859700  | 0.92314400  |
| N | -1.16141000 | 2.40968900  | 1.18175600  |
| N | -0.66565500 | 3.24967200  | 0.27455500  |
| O | 0.62524400  | 3.55318700  | 0.23946000  |

## **B\_TS2**

NImag=1 (-881.3271 )

Sum of electronic and zero-point Energies= -1739.044147

Sum of electronic and thermal Energies= -1739.010260

Sum of electronic and thermal Enthalpies= -1739.009316

Sum of electronic and thermal Free Energies= -1739.111704

|   |             |             |             |
|---|-------------|-------------|-------------|
| C | -0.08321300 | 0.16995000  | -1.32755200 |
| O | 0.71397800  | 0.41697900  | -2.22806100 |
| C | -1.29763300 | 0.86582000  | -1.02375400 |
| C | -1.33980800 | 2.29577100  | -1.55565800 |
| H | -1.61446500 | 0.79679300  | 0.01784800  |
| H | -2.30243400 | 0.29513100  | -1.58161100 |
| H | -1.06735600 | 2.30379000  | -2.61480300 |
| H | -2.37290100 | 2.64278000  | -1.45930700 |
| C | -0.40328500 | 3.17516400  | -0.76315600 |
| C | -0.73039500 | 3.51535000  | 0.55613200  |
| C | 0.82259200  | 3.60164600  | -1.27838200 |
| C | 0.14211300  | 4.26435900  | 1.33780700  |
| H | -1.68781800 | 3.18675300  | 0.95800800  |
| C | 1.69888900  | 4.35727300  | -0.49859700 |
| H | 1.09099600  | 3.32971700  | -2.29579200 |
| C | 1.36141500  | 4.69137600  | 0.81033200  |
| H | -0.13147000 | 4.52748400  | 2.35571100  |
| H | 2.64752900  | 4.68421400  | -0.91583300 |
| H | 2.03857400  | 5.28883100  | 1.41471700  |
| C | 5.12702000  | 1.50547300  | 1.32113500  |
| C | 5.63911700  | 0.31062500  | 0.82204100  |
| C | 4.82279200  | -0.49157500 | 0.02872800  |
| C | 3.00235000  | 1.10641900  | 0.22901300  |

|   |             |             |             |
|---|-------------|-------------|-------------|
| C | 3.82127800  | 1.90351600  | 1.02427000  |
| H | 5.75174200  | 2.13755700  | 1.94480500  |
| H | 6.65764100  | 0.00884400  | 1.04994100  |
| H | 1.99353500  | 1.43444500  | -0.01394600 |
| H | 3.43397900  | 2.84312500  | 1.40483400  |
| C | 3.51885900  | -0.09349100 | -0.25378300 |
| C | 2.80915100  | -1.11881600 | -1.10867300 |
| C | 3.82107400  | -2.32133100 | -1.22351200 |
| H | 2.52281200  | -0.73045100 | -2.08324200 |
| C | 5.15724400  | -1.80178900 | -0.63709800 |
| H | 3.92529000  | -2.60467700 | -2.27114600 |
| H | 5.57549000  | -2.54622700 | 0.04951900  |
| H | 5.89334600  | -1.66044700 | -1.43563100 |
| N | 1.56292600  | -1.55360600 | -0.44599900 |
| O | 3.37930900  | -3.51153300 | -0.59278300 |
| C | 1.57648600  | -2.52958200 | 0.50666000  |
| C | 2.83511800  | -3.30986200 | 0.69189300  |
| H | 3.52978200  | -2.76980500 | 1.35265600  |
| H | 2.61508000  | -4.28576700 | 1.12575300  |
| N | 0.41259000  | -2.65778000 | 1.07510700  |
| C | 0.32166200  | -1.02223600 | -0.45088200 |
| N | -0.35376800 | -1.70813100 | 0.47373900  |
| C | -1.72798700 | -1.53825500 | 0.87307300  |
| C | -1.97256500 | -0.72591200 | 1.98746000  |
| C | -2.72578800 | -2.12343000 | 0.10344000  |

|   |             |             |             |
|---|-------------|-------------|-------------|
| C | -3.29963700 | -0.46637800 | 2.29379500  |
| C | -4.04462600 | -1.84332600 | 0.46693100  |
| C | -4.34410600 | -0.98868300 | 1.52146800  |
| H | -3.52979100 | 0.19541900  | 3.12543800  |
| H | -4.84769000 | -2.23160900 | -0.15361600 |
| C | -0.83648200 | -0.09028600 | 2.74534100  |
| H | -0.11604300 | -0.83613100 | 3.09615800  |
| H | -0.29539300 | 0.62661100  | 2.11198200  |
| H | -1.21472600 | 0.45587600  | 3.61186900  |
| C | -2.42350100 | -2.93054200 | -1.12837200 |
| H | -2.42684500 | -2.26359300 | -1.99821200 |
| H | -1.46205300 | -3.44821200 | -1.06359100 |
| H | -3.20331300 | -3.67836900 | -1.28939200 |
| C | -5.75823500 | -0.54451400 | 1.77377200  |
| H | -5.86362000 | 0.47751900  | 1.39118700  |
| H | -6.47659800 | -1.18522100 | 1.25642500  |
| H | -5.99822900 | -0.53617500 | 2.84110400  |
| H | -6.23966600 | 0.48190300  | -1.00994200 |
| C | -4.40128800 | 0.46127500  | -1.34702000 |
| O | -3.50913400 | -0.10690700 | -2.05968700 |
| O | -4.27137000 | 1.37385300  | -0.52846700 |
| O | -5.65144600 | -0.07333300 | -1.54387000 |

## IM2

NImag=0

Sum of electronic and zero-point Energies= -1474.174900



Sum of electronic and thermal Energies= -1474.145065

Sum of electronic and thermal Enthalpies= -1474.144121

Sum of electronic and thermal Free Energies= -1474.237710

|   |             |             |             |
|---|-------------|-------------|-------------|
| C | -0.16684300 | 0.24412500  | -1.20253400 |
| O | 0.36955000  | 0.01146500  | -2.33563200 |
| C | -0.53993900 | 1.40340500  | -0.58866900 |
| C | -0.32988900 | 2.72596400  | -1.25690400 |
| H | -1.00021800 | 1.37067600  | 0.39587200  |
| H | 0.13365500  | 2.52504000  | -2.23183100 |
| H | -1.29188400 | 3.21445600  | -1.47153200 |
| C | 0.53506300  | 3.71081100  | -0.48847200 |
| C | 0.46135200  | 5.07836600  | -0.77020500 |
| C | 1.44184100  | 3.28573200  | 0.48376900  |
| C | 1.27675600  | 5.99301500  | -0.11210200 |
| H | -0.24605800 | 5.42731300  | -1.51973700 |
| C | 2.26400900  | 4.19698200  | 1.14397600  |
| H | 1.50084000  | 2.22579500  | 0.71560300  |
| C | 2.18586200  | 5.55477600  | 0.84921300  |
| H | 1.20192100  | 7.05094500  | -0.34760900 |
| H | 2.96636600  | 3.83973900  | 1.89295600  |
| H | 2.82325400  | 6.26691100  | 1.36498100  |
| C | 4.73803300  | 0.45246500  | 0.85270700  |
| C | 4.58600400  | -0.88595900 | 1.21309900  |
| C | 3.60818100  | -1.64044900 | 0.57717400  |

|   |             |             |             |
|---|-------------|-------------|-------------|
| C | 2.95392300  | 0.26782500  | -0.78190500 |
| C | 3.93415400  | 1.02138700  | -0.13540800 |
| H | 5.49868400  | 1.05562600  | 1.33985900  |
| H | 5.22518000  | -1.33117800 | 1.97061100  |
| H | 2.32148700  | 0.68514600  | -1.56180700 |
| H | 4.06468300  | 2.06561200  | -0.40302200 |
| C | 2.79714800  | -1.06263600 | -0.40459000 |
| C | 1.84470000  | -2.09222900 | -0.96954600 |
| C | 2.50015900  | -3.42543700 | -0.52302000 |
| H | 1.68859600  | -1.99431200 | -2.04400100 |
| C | 3.26241500  | -3.09434300 | 0.77784200  |
| H | 3.22501800  | -3.69459300 | -1.29518600 |
| H | 2.62409900  | -3.21828100 | 1.66222200  |
| H | 4.13273200  | -3.74197800 | 0.91390800  |
| N | 0.49531500  | -2.03410800 | -0.36003400 |
| O | 1.60771300  | -4.52026300 | -0.46630400 |
| C | -0.12111200 | -3.06933000 | 0.28780200  |
| C | 0.57190400  | -4.38354600 | 0.47653500  |
| H | 0.94095800  | -4.47482300 | 1.50672900  |
| H | -0.13732000 | -5.19396200 | 0.29823500  |
| N | -1.32840200 | -2.75293300 | 0.65462900  |
| C | -0.38550600 | -1.01305300 | -0.40987200 |
| N | -1.47674100 | -1.46590700 | 0.21117100  |
| C | -2.75411900 | -0.81351400 | 0.29084600  |
| C | -3.18783200 | -0.34812000 | 1.53230500  |

|   |             |             |             |
|---|-------------|-------------|-------------|
| C | -3.49634900 | -0.68356900 | -0.88440900 |
| C | -4.42908700 | 0.28081300  | 1.57895200  |
| C | -4.72977900 | -0.04205800 | -0.78302500 |
| C | -5.21003700 | 0.44288200  | 0.43345600  |
| H | -4.79128300 | 0.66059100  | 2.53167100  |
| H | -5.33052000 | 0.07996200  | -1.68124600 |
| C | -2.32877900 | -0.51009900 | 2.75801900  |
| H | -2.17406700 | -1.56793700 | 2.99283500  |
| H | -1.34088200 | -0.06040900 | 2.60607000  |
| H | -2.79366700 | -0.02740300 | 3.62008700  |
| C | -2.98672900 | -1.21682400 | -2.19851300 |
| H | -2.09016600 | -0.68588300 | -2.54039200 |
| H | -2.72650300 | -2.27804900 | -2.11047900 |
| H | -3.75578200 | -1.12049700 | -2.96791000 |
| C | -6.55889500 | 1.10986500  | 0.52004200  |
| H | -6.53178500 | 1.96902100  | 1.19621200  |
| H | -6.89378100 | 1.45692900  | -0.46048900 |
| H | -7.31253700 | 0.41307500  | 0.90316000  |

### A\_TS3

NImag=1 (-1251.4118 )

Sum of electronic and zero-point Energies= -1944.914588

Sum of electronic and thermal Energies= -1944.877128

Sum of electronic and thermal Enthalpies= -1944.876184

Sum of electronic and thermal Free Energies= -1944.986401

|   |             |            |             |
|---|-------------|------------|-------------|
| C | -0.44932100 | 0.03868600 | -0.17327600 |
|---|-------------|------------|-------------|

|   |             |             |             |
|---|-------------|-------------|-------------|
| O | -0.52094700 | -1.32496300 | -0.02249400 |
| C | 0.73692900  | 0.72291300  | -0.06626900 |
| C | 1.98947200  | 0.07567700  | 0.16400500  |
| H | 0.73392800  | 1.78475600  | -0.28273700 |
| H | 1.91850900  | -0.76909800 | 0.86205300  |
| H | 0.18846700  | -1.74089400 | -0.57165400 |
| C | 3.23471900  | 0.86886600  | 0.31020900  |
| C | 3.38009200  | 2.16971500  | -0.19328200 |
| C | 4.34717500  | 0.28294100  | 0.93170400  |
| C | 4.58156700  | 2.86010500  | -0.06188300 |
| H | 2.55367800  | 2.65419800  | -0.70849000 |
| C | 5.54913800  | 0.96972100  | 1.05778700  |
| H | 4.26455700  | -0.73402600 | 1.30983100  |
| C | 5.67402700  | 2.26715400  | 0.56623500  |
| H | 4.66692300  | 3.86542600  | -0.46623800 |
| H | 6.39248800  | 0.48485700  | 1.54086300  |
| H | 6.61182300  | 2.80524000  | 0.66289100  |
| C | -4.96497000 | -2.99565900 | 2.76493000  |
| C | -5.60660400 | -3.07164700 | 1.53155500  |
| C | -4.97880700 | -2.53015400 | 0.41281000  |
| C | -3.07499800 | -1.85835300 | 1.76394600  |
| C | -3.70736500 | -2.39774600 | 2.88051200  |
| H | -5.44369600 | -3.41209200 | 3.64581200  |
| H | -6.58008100 | -3.54588300 | 1.44432700  |
| H | -2.08345600 | -1.42015800 | 1.83447100  |

|   |             |             |             |
|---|-------------|-------------|-------------|
| H | -3.21535200 | -2.36241500 | 3.84712800  |
| C | -3.73137800 | -1.92564700 | 0.53844000  |
| C | -3.24489400 | -1.39374600 | -0.79117700 |
| C | -4.46344900 | -1.59431800 | -1.77155100 |
| H | -2.36330800 | -1.92433500 | -1.14358500 |
| C | -5.45275400 | -2.51691800 | -1.01824900 |
| H | -4.11539200 | -2.04861600 | -2.69955300 |
| H | -6.47446600 | -2.14094300 | -1.13953400 |
| H | -5.43145000 | -3.52572700 | -1.44469500 |
| N | -2.88931400 | 0.03018900  | -0.69230900 |
| O | -5.07438100 | -0.38511000 | -2.19070600 |
| C | -3.86007100 | 0.99565200  | -0.76638200 |
| C | -5.23308000 | 0.56231000  | -1.15636000 |
| H | -5.77076800 | 0.13917100  | -0.29512400 |
| H | -5.79656000 | 1.40730400  | -1.55244600 |
| N | -3.38701800 | 2.18373700  | -0.57166300 |
| C | -1.71380900 | 0.66059400  | -0.40230600 |
| N | -2.05382700 | 1.97179000  | -0.32821800 |
| C | -1.19455700 | 3.06714900  | 0.00272500  |
| C | -0.86996800 | 3.26989300  | 1.34618600  |
| C | -0.64913400 | 3.82082700  | -1.03805900 |
| C | 0.07746300  | 4.24914000  | 1.63308700  |
| C | 0.28827800  | 4.79519600  | -0.69942300 |
| C | 0.68058800  | 5.00356700  | 0.62458800  |
| H | 0.36622500  | 4.41459700  | 2.66824800  |

|   |             |             |             |
|---|-------------|-------------|-------------|
| H | 0.73999400  | 5.38876300  | -1.49075700 |
| C | -1.47684800 | 2.41094200  | 2.42244700  |
| H | -2.56023700 | 2.32129400  | 2.29601100  |
| H | -1.05106000 | 1.40055300  | 2.39070100  |
| H | -1.27595400 | 2.83090800  | 3.40999500  |
| C | -1.02466300 | 3.53421000  | -2.46734400 |
| H | -0.71335600 | 2.52267300  | -2.75423700 |
| H | -2.10739100 | 3.59770000  | -2.61151900 |
| H | -0.54040500 | 4.24137600  | -3.14357100 |
| C | 1.76960700  | 5.98857800  | 0.95915700  |
| H | 1.57186700  | 6.49370800  | 1.90830300  |
| H | 2.72798300  | 5.46561100  | 1.05558500  |
| H | 1.87661100  | 6.74668600  | 0.17943600  |
| C | 3.71199900  | -2.87407900 | -0.82195400 |
| C | 3.81425000  | -3.93082900 | 0.09689100  |
| C | 5.08461200  | -4.37735000 | 0.50917500  |
| C | 6.18360000  | -3.73012400 | -0.01226800 |
| C | 6.05363900  | -2.65434000 | -0.93298300 |
| C | 4.82320600  | -2.20608800 | -1.36007300 |
| H | 5.17845400  | -5.19485400 | 1.21613000  |
| H | 7.17983100  | -4.04173100 | 0.28557700  |
| H | 6.95275100  | -2.17228800 | -1.30405300 |
| H | 4.70427600  | -1.37819400 | -2.05005700 |
| N | 2.55239400  | -4.32509000 | 0.45703000  |
| N | 1.70650400  | -3.56914700 | -0.17673000 |

|   |            |             |             |
|---|------------|-------------|-------------|
| N | 2.37307000 | -2.71942000 | -0.95805300 |
| O | 1.73050900 | -1.76269300 | -1.63794100 |
| H | 1.99830400 | -0.71689500 | -0.90168900 |

### B\_TS3

NImag=1 (-1291.9485)

|                                              |              |
|----------------------------------------------|--------------|
| Sum of electronic and zero-point Energies=   | -1738.494725 |
| Sum of electronic and thermal Energies=      | -1738.461301 |
| Sum of electronic and thermal Enthalpies=    | -1738.460357 |
| Sum of electronic and thermal Free Energies= | -1738.560563 |

|   |             |             |             |
|---|-------------|-------------|-------------|
| C | -0.00975600 | 0.30719700  | -1.30914200 |
| O | 0.72359700  | 1.29958900  | -1.72788000 |
| C | -1.38031800 | 0.36753300  | -1.13069400 |
| C | -2.04435200 | 1.64750400  | -1.20651200 |
| H | -1.93994800 | -0.50284000 | -0.80699700 |
| H | -1.45134000 | 2.13879300  | -0.12563700 |
| H | -1.63470000 | 2.30414400  | -1.97981800 |
| C | -3.51304300 | 1.70372200  | -1.06995500 |
| C | -4.27356100 | 2.63036100  | -1.80090000 |
| C | -4.20807700 | 0.86961200  | -0.17601400 |
| C | -5.65406900 | 2.71497200  | -1.65955700 |
| H | -3.75937800 | 3.29186300  | -2.49427800 |
| C | -5.58907100 | 0.94816900  | -0.03882500 |
| H | -3.64706200 | 0.16480200  | 0.43514500  |
| C | -6.32714900 | 1.86944400  | -0.78052600 |

|   |             |             |             |
|---|-------------|-------------|-------------|
| H | -6.20956200 | 3.44480800  | -2.24398400 |
| H | -6.09505300 | 0.29179900  | 0.66594100  |
| H | -7.40594600 | 1.93269800  | -0.66822000 |
| C | 4.46825600  | 2.11946100  | 2.12951600  |
| C | 5.33943000  | 1.40256500  | 1.30944000  |
| C | 4.81727400  | 0.71025800  | 0.22003300  |
| C | 2.56991100  | 1.44003100  | 0.79548200  |
| C | 3.09394000  | 2.14680100  | 1.87563600  |
| H | 4.86690600  | 2.67603900  | 2.97355000  |
| H | 6.40787400  | 1.39330100  | 1.51278100  |
| H | 1.50600600  | 1.45768300  | 0.57748600  |
| H | 2.42017000  | 2.74812100  | 2.47986100  |
| C | 3.44732300  | 0.73530600  | -0.02114400 |
| C | 3.08796500  | -0.05116600 | -1.25911700 |
| C | 4.42309900  | -0.76342600 | -1.67845300 |
| H | 2.68151500  | 0.60147900  | -2.03060300 |
| C | 5.53957700  | -0.08700300 | -0.83973000 |
| H | 4.59319500  | -0.63377200 | -2.74848700 |
| H | 6.21152100  | -0.85341400 | -0.43517700 |
| H | 6.14918100  | 0.56514800  | -1.47623300 |
| N | 2.04467600  | -1.04061800 | -0.96468100 |
| O | 4.41078100  | -2.17749500 | -1.50907100 |
| C | 2.36527100  | -2.22200300 | -0.35912100 |
| C | 3.80847200  | -2.59602600 | -0.30292800 |
| H | 4.28808500  | -2.12416300 | 0.56860900  |



|   |             |             |             |
|---|-------------|-------------|-------------|
| H | 3.91967200  | -3.67874500 | -0.22638600 |
| N | 1.32765700  | -2.86210700 | 0.06949400  |
| C | 0.68323700  | -0.88125000 | -0.87458400 |
| N | 0.27306200  | -2.02926500 | -0.25091700 |
| C | -0.98035400 | -2.27140300 | 0.39199300  |
| C | -1.25354800 | -1.61093600 | 1.59407200  |
| C | -1.87829600 | -3.15348800 | -0.21101300 |
| C | -2.49038500 | -1.86483300 | 2.18932100  |
| C | -3.09902400 | -3.37433600 | 0.42162100  |
| C | -3.42228800 | -2.72973300 | 1.61656800  |
| H | -2.73364900 | -1.35608000 | 3.11988000  |
| H | -3.81777100 | -4.05239800 | -0.03412300 |
| C | -0.29263100 | -0.62037900 | 2.19069200  |
| H | 0.74790300  | -0.91403500 | 2.01645700  |
| H | -0.44250100 | 0.37986800  | 1.75417600  |
| H | -0.45122100 | -0.54127800 | 3.26959000  |
| C | -1.52596800 | -3.79923900 | -1.52409600 |
| H | -1.35865900 | -3.03255900 | -2.28901500 |
| H | -0.60384800 | -4.38327300 | -1.44099300 |
| H | -2.33078600 | -4.45637600 | -1.86273300 |
| C | -4.77391800 | -2.93059100 | 2.25390200  |
| H | -5.49979500 | -2.21750000 | 1.84686100  |
| H | -5.15875800 | -3.93728800 | 2.06568900  |
| H | -4.72930400 | -2.77493600 | 3.33539200  |
| H | 0.49936400  | 2.82155800  | -0.91276100 |

|   |             |            |             |
|---|-------------|------------|-------------|
| C | 0.08358800  | 3.41092200 | 0.87799200  |
| O | 0.42825300  | 4.12838400 | 1.80780800  |
| O | -0.73598700 | 2.40281400 | 0.96683100  |
| O | 0.59722200  | 3.64198000 | -0.35856100 |

### D\_TS3

NImag=1 (-1640.8811)

|                                              |              |
|----------------------------------------------|--------------|
| Sum of electronic and zero-point Energies=   | -1474.124231 |
| Sum of electronic and thermal Energies=      | -1474.094831 |
| Sum of electronic and thermal Enthalpies=    | -1474.093887 |
| Sum of electronic and thermal Free Energies= | -1474.187256 |

|   |             |             |             |
|---|-------------|-------------|-------------|
| C | -0.27669300 | -0.00743300 | -1.44738300 |
| O | 0.45422400  | 0.56861700  | -2.40157200 |
| C | -1.33368000 | 0.74558500  | -0.97562500 |
| C | -1.38296000 | 2.02794700  | -1.64538500 |
| H | -1.86951700 | 0.50798800  | -0.05977100 |
| H | -0.06825800 | 1.68767900  | -2.18648000 |
| H | -1.75980700 | 2.01437400  | -2.67323300 |
| C | -1.76136000 | 3.21607000  | -0.86720600 |
| C | -2.39502900 | 4.31787200  | -1.46373700 |
| C | -1.45093500 | 3.31501500  | 0.50095400  |
| C | -2.70958200 | 5.45629800  | -0.73154400 |
| H | -2.64338900 | 4.27032000  | -2.52143400 |
| C | -1.77520000 | 4.44912700  | 1.23780900  |
| H | -0.93096600 | 2.48970900  | 0.98458300  |

|   |             |             |             |
|---|-------------|-------------|-------------|
| C | -2.40633100 | 5.53054200  | 0.62709200  |
| H | -3.20099000 | 6.29118600  | -1.22369200 |
| H | -1.52479600 | 4.49200800  | 2.29478800  |
| H | -2.65439100 | 6.41911800  | 1.19919800  |
| C | 3.59485500  | 2.65113300  | 1.73997000  |
| C | 4.49845300  | 1.62211800  | 1.48847800  |
| C | 4.16126200  | 0.63859200  | 0.56182700  |
| C | 2.03845700  | 1.73362600  | 0.12622600  |
| C | 2.37634800  | 2.70954200  | 1.05984000  |
| H | 3.84530600  | 3.42240600  | 2.46228600  |
| H | 5.45408500  | 1.58884700  | 2.00493000  |
| H | 1.10843700  | 1.81113100  | -0.42828300 |
| H | 1.68540500  | 3.52702600  | 1.24447600  |
| C | 2.93685200  | 0.69080900  | -0.10111100 |
| C | 2.76294500  | -0.48786000 | -1.03476800 |
| C | 4.11287700  | -1.28779500 | -0.92144900 |
| H | 2.53405200  | -0.17530000 | -2.05438900 |
| C | 4.99182700  | -0.53492200 | 0.11001000  |
| H | 4.59045000  | -1.29518200 | -1.90177800 |
| H | 5.27471700  | -1.20099400 | 0.93332900  |
| H | 5.92778000  | -0.20679100 | -0.35360400 |
| N | 1.64034000  | -1.34053000 | -0.61320600 |
| O | 3.95002200  | -2.66381100 | -0.61618000 |
| C | 1.77290700  | -2.41440900 | 0.22428300  |
| C | 3.15115200  | -2.90557900 | 0.51885800  |

|   |             |             |             |
|---|-------------|-------------|-------------|
| H | 3.54831800  | -2.40207600 | 1.41272100  |
| H | 3.14073900  | -3.98109900 | 0.70005700  |
| N | 0.62926100  | -2.86961400 | 0.62696400  |
| C | 0.30897600  | -1.07824800 | -0.71433800 |
| N | -0.28613100 | -2.03265500 | 0.03223600  |
| C | -1.68708000 | -2.19356000 | 0.27821600  |
| C | -2.18389600 | -1.79321600 | 1.52299900  |
| C | -2.49263300 | -2.72928300 | -0.72595500 |
| C | -3.54713800 | -1.94809900 | 1.74972200  |
| C | -3.85456900 | -2.85871600 | -0.45212800 |
| C | -4.39649300 | -2.47544400 | 0.77270500  |
| H | -3.96074200 | -1.63835300 | 2.70710400  |
| H | -4.50659100 | -3.26960800 | -1.21917700 |
| C | -1.26530300 | -1.19409200 | 2.55480100  |
| H | -0.54056900 | -1.93191600 | 2.91342800  |
| H | -0.69577000 | -0.35725000 | 2.13160900  |
| H | -1.83531100 | -0.82227600 | 3.40880600  |
| C | -1.91205900 | -3.12342000 | -2.05654700 |
| H | -1.62835400 | -2.23404700 | -2.63147200 |
| H | -1.01402100 | -3.73661900 | -1.93028400 |
| H | -2.63894300 | -3.69081000 | -2.64161600 |
| C | -5.87296900 | -2.60698700 | 1.04490400  |
| H | -6.38365100 | -3.12140800 | 0.22751400  |
| H | -6.05494400 | -3.16697300 | 1.96745100  |
| H | -6.33454800 | -1.62122100 | 1.16389600  |

### TS3

NImag=1 (-1212.7998)

|                                              |              |
|----------------------------------------------|--------------|
| Sum of electronic and zero-point Energies=   | -1944.369139 |
| Sum of electronic and thermal Energies=      | -1944.331557 |
| Sum of electronic and thermal Enthalpies=    | -1944.330613 |
| Sum of electronic and thermal Free Energies= | -1944.443275 |

|   |             |             |             |
|---|-------------|-------------|-------------|
| C | -0.41567500 | 0.28836200  | 1.12030300  |
| O | 0.62669500  | 0.61402400  | 1.81117700  |
| C | -0.68321000 | -0.95843000 | 0.55452600  |
| C | 0.25765300  | -2.03390500 | 0.57380900  |
| H | -1.56308700 | -1.06954000 | -0.07178200 |
| H | 1.10003100  | -1.65096100 | -0.46518800 |
| H | 0.98994800  | -1.96689500 | 1.38389000  |
| C | -0.17147300 | -3.41134000 | 0.24663800  |
| C | 0.79907800  | -4.41655600 | 0.07899100  |
| C | -1.51367100 | -3.77944300 | 0.05472200  |
| C | 0.44875300  | -5.71562300 | -0.26110400 |
| H | 1.84798200  | -4.15267600 | 0.20339100  |
| C | -1.86432100 | -5.07997300 | -0.29875900 |
| H | -2.29841500 | -3.04171300 | 0.20834400  |
| C | -0.88939800 | -6.06022400 | -0.45845400 |
| H | 1.22721600  | -6.46366500 | -0.38769900 |
| H | -2.91417500 | -5.33065200 | -0.43749300 |
| H | -1.16412800 | -7.07519700 | -0.73211700 |
| C | 2.89181000  | 3.07993900  | -2.58544400 |

|   |             |            |             |
|---|-------------|------------|-------------|
| C | 2.53096400  | 4.28936000 | -1.99322100 |
| C | 1.72388000  | 4.26788100 | -0.85819800 |
| C | 1.67247100  | 1.83867400 | -0.90100700 |
| C | 2.47127800  | 1.86367100 | -2.04118500 |
| H | 3.51806700  | 3.08445100 | -3.47347000 |
| H | 2.87834500  | 5.23308900 | -2.40764200 |
| H | 1.38256600  | 0.88846100 | -0.46554100 |
| H | 2.76057400  | 0.91564800 | -2.48580900 |
| C | 1.29284000  | 3.05240900 | -0.33318700 |
| C | 0.41731600  | 3.24454500 | 0.88266400  |
| C | 0.32506300  | 4.80433700 | 1.06226600  |
| H | 0.82534000  | 2.72152600 | 1.74840600  |
| C | 1.24395400  | 5.42821900 | -0.02207600 |
| H | 0.66805400  | 5.06788500 | 2.06376600  |
| H | 0.68717100  | 6.17936500 | -0.59610100 |
| H | 2.08315400  | 5.95493400 | 0.44623300  |
| N | -0.92197200 | 2.67669700 | 0.67954800  |
| O | -0.99685100 | 5.32933400 | 1.01279400  |
| C | -1.93563200 | 3.38223300 | 0.09905800  |
| C | -1.74352900 | 4.84964100 | -0.08347500 |
| H | -1.22786400 | 5.04873500 | -1.03594200 |
| H | -2.70577800 | 5.36421700 | -0.08961900 |
| N | -2.95771900 | 2.64748000 | -0.19559700 |
| C | -1.28999000 | 1.35161700 | 0.68763900  |
| N | -2.57011700 | 1.37958400 | 0.19556900  |

|   |             |             |             |
|---|-------------|-------------|-------------|
| C | -3.48325800 | 0.29754700  | 0.04705900  |
| C | -3.76454200 | -0.15674000 | -1.24692400 |
| C | -4.04322400 | -0.29046100 | 1.18411900  |
| C | -4.63998500 | -1.22988100 | -1.38458200 |
| C | -4.90704900 | -1.36914500 | 0.99633700  |
| C | -5.21330600 | -1.85297700 | -0.27440600 |
| H | -4.85814200 | -1.60697000 | -2.38185800 |
| H | -5.34509900 | -1.84719700 | 1.87006200  |
| C | -3.08075300 | 0.47127400  | -2.43153100 |
| H | -3.37673500 | 1.51833100  | -2.54928700 |
| H | -1.99314300 | 0.45409300  | -2.29350200 |
| H | -3.32036200 | -0.07204200 | -3.34848200 |
| C | -3.67764100 | 0.19212100  | 2.55939400  |
| H | -2.65079500 | -0.11096500 | 2.79711400  |
| H | -3.71833500 | 1.28436500  | 2.61960600  |
| H | -4.35204100 | -0.22781900 | 3.30972700  |
| C | -6.11176000 | -3.05043300 | -0.45273800 |
| H | -5.52626500 | -3.93515300 | -0.72636300 |
| H | -6.65308300 | -3.28113900 | 0.46872400  |
| H | -6.84503500 | -2.88368000 | -1.24811400 |
| C | 3.79294200  | -1.42149400 | 0.19244300  |
| C | 4.97127000  | -2.17086400 | 0.04741400  |
| C | 5.95873600  | -2.12014000 | 1.05123200  |
| C | 5.70712600  | -1.32475000 | 2.14751100  |
| C | 4.49836000  | -0.58601500 | 2.27342300  |

|   |            |             |             |
|---|------------|-------------|-------------|
| C | 3.51364300 | -0.61269900 | 1.30895200  |
| H | 6.87582500 | -2.69296800 | 0.95185500  |
| H | 6.44368400 | -1.26123300 | 2.94428600  |
| H | 4.34192900 | 0.01210400  | 3.16680100  |
| H | 2.56610300 | -0.08016700 | 1.41481100  |
| N | 4.91561800 | -2.85395800 | -1.13688400 |
| N | 3.77845400 | -2.56561300 | -1.70947000 |
| N | 3.10426400 | -1.71293900 | -0.94255000 |
| O | 1.91321600 | -1.23582500 | -1.31004200 |

### IM3

NImag=0

|                                              |              |
|----------------------------------------------|--------------|
| Sum of electronic and zero-point Energies=   | -1944.920728 |
| Sum of electronic and thermal Energies=      | -1944.881780 |
| Sum of electronic and thermal Enthalpies=    | -1944.880836 |
| Sum of electronic and thermal Free Energies= | -1944.998692 |

|   |             |             |             |
|---|-------------|-------------|-------------|
| C | -0.45509600 | -0.24591300 | -0.02135700 |
| O | -0.57991800 | -1.56184900 | 0.40635700  |
| C | 0.78761700  | 0.43145400  | 0.17900100  |
| C | 1.88421000  | -0.10258600 | 0.78450400  |
| H | 0.86301300  | 1.43586200  | -0.22830500 |
| H | 1.81654100  | -1.10897500 | 1.19635000  |
| H | 0.06257200  | -2.11324100 | -0.08463400 |
| C | 3.17183900  | 0.57749900  | 0.94523500  |
| C | 3.36386700  | 1.94105700  | 0.65434200  |



|   |              |              |              |
|---|--------------|--------------|--------------|
| C | 4. 27933100  | -0. 15440400 | 1. 40291100  |
| C | 4. 61329300  | 2. 53020200  | 0. 79431700  |
| H | 2. 52424100  | 2. 55265900  | 0. 33148600  |
| C | 5. 52889000  | 0. 43822200  | 1. 54490200  |
| H | 4. 15467800  | -1. 21072300 | 1. 63464300  |
| C | 5. 70607600  | 1. 78440100  | 1. 23738100  |
| H | 4. 73536400  | 3. 58440900  | 0. 56136400  |
| H | 6. 36684200  | -0. 15922300 | 1. 89257800  |
| H | 6. 68018500  | 2. 25066800  | 1. 34680500  |
| C | -5. 35040600 | -1. 91517000 | 3. 17362100  |
| C | -5. 93807000 | -2. 29096700 | 1. 96839400  |
| C | -5. 20043900 | -2. 16994100 | 0. 79323400  |
| C | -3. 29682000 | -1. 31696300 | 2. 03599000  |
| C | -4. 03884200 | -1. 43433400 | 3. 20829500  |
| H | -5. 91570200 | -2. 00009400 | 4. 09675800  |
| H | -6. 95635700 | -2. 66953600 | 1. 94610400  |
| H | -2. 26822100 | -0. 96748600 | 2. 05098800  |
| H | -3. 59325000 | -1. 15590400 | 4. 15818700  |
| C | -3. 89746400 | -1. 68209500 | 0. 83404000  |
| C | -3. 29238600 | -1. 60035800 | -0. 55027500 |
| C | -4. 47235400 | -1. 98542300 | -1. 52240700 |
| H | -2. 45880500 | -2. 29052300 | -0. 66342800 |
| C | -5. 60812100 | -2. 52355300 | -0. 61478500 |
| H | -4. 13184300 | -2. 74587400 | -2. 22606300 |
| H | -6. 56411700 | -2. 08104200 | -0. 91602100 |

|   |             |             |             |
|---|-------------|-------------|-------------|
| H | -5.70960500 | -3.60808600 | -0.73238800 |
| N | -2.79743100 | -0.25826300 | -0.84624400 |
| O | -4.90793100 | -0.92344400 | -2.35282400 |
| C | -3.65667700 | 0.72849500  | -1.26457400 |
| C | -5.02815800 | 0.31016500  | -1.67546000 |
| H | -5.68602600 | 0.22221300  | -0.79717300 |
| H | -5.45493500 | 1.03653200  | -2.36748900 |
| N | -3.11830800 | 1.89630900  | -1.29090000 |
| C | -1.59135000 | 0.35155600  | -0.52535100 |
| N | -1.82654400 | 1.68197300  | -0.82815000 |
| C | -1.04489200 | 2.80422000  | -0.43210500 |
| C | -0.93985800 | 3.12250600  | 0.92809300  |
| C | -0.37508600 | 3.52949100  | -1.42117700 |
| C | -0.09995200 | 4.17495500  | 1.28451200  |
| C | 0.44550800  | 4.58297900  | -1.01834200 |
| C | 0.60616300  | 4.90889200  | 0.32879700  |
| H | 0.00688200  | 4.42877400  | 2.33720500  |
| H | 0.98052700  | 5.15338300  | -1.77425800 |
| C | -1.66992200 | 2.32073000  | 1.97148500  |
| H | -2.66541400 | 2.02596400  | 1.62467800  |
| H | -1.11686400 | 1.40281700  | 2.20457500  |
| H | -1.77841900 | 2.89779400  | 2.89282900  |
| C | -0.52442800 | 3.14558800  | -2.86880200 |
| H | -0.20733200 | 2.10901900  | -3.02966400 |
| H | -1.57041200 | 3.21126200  | -3.18317300 |

|   |            |             |             |
|---|------------|-------------|-------------|
| H | 0.07753400 | 3.79534800  | -3.50790200 |
| C | 1.53868900 | 6.01342400  | 0.75663300  |
| H | 1.05097000 | 6.69094700  | 1.46394000  |
| H | 2.42238700 | 5.60103000  | 1.25630300  |
| H | 1.87911200 | 6.60102400  | -0.09945900 |
| C | 3.86686800 | -2.45831100 | -1.03861200 |
| C | 3.67173300 | -3.56973900 | -0.20740300 |
| C | 4.77477100 | -4.20335200 | 0.39466000  |
| C | 6.02009800 | -3.67722400 | 0.13068100  |
| C | 6.19203300 | -2.54838700 | -0.71563400 |
| C | 5.12868300 | -1.91605200 | -1.32076100 |
| H | 4.63246100 | -5.06288500 | 1.04027100  |
| H | 6.89886100 | -4.13055100 | 0.57735400  |
| H | 7.19548300 | -2.16937800 | -0.88121200 |
| H | 5.24284600 | -1.04114000 | -1.94961000 |
| N | 2.32326500 | -3.81877600 | -0.10775600 |
| N | 1.70396000 | -2.94070700 | -0.82168100 |
| N | 2.60058400 | -2.13322900 | -1.39300400 |
| O | 2.20388800 | -1.07504500 | -2.13210800 |
| H | 1.96371000 | -0.39987600 | -1.45277300 |

#### TS4(RR)

NImag=1 (-169.9454)

Sum of electronic and zero-point Energies= -3189.565657

Sum of electronic and thermal Energies= -3189.504593

Sum of electronic and thermal Enthalpies= -3189.503649

Sum of electronic and thermal Free Energies= -3189.663758

|   |             |             |             |
|---|-------------|-------------|-------------|
| C | 2.07407900  | 0.78976900  | -0.50306000 |
| O | 1.91045300  | -0.56333000 | -0.70041900 |
| C | 1.09327600  | 1.67271000  | -0.87963000 |
| C | -0.17630200 | 1.19626800  | -1.27601200 |
| H | 1.23824100  | 2.74032100  | -0.75919900 |
| H | -0.17259300 | 0.18133000  | -1.67118400 |
| H | 1.16814000  | -0.83886200 | -0.12224500 |
| C | -1.16180400 | 2.09231000  | -1.90315500 |
| C | -1.37724800 | 3.40744300  | -1.45993800 |
| C | -1.92118300 | 1.63004500  | -2.98753300 |
| C | -2.32799000 | 4.21688800  | -2.07014700 |
| H | -0.80598900 | 3.79092400  | -0.61806900 |
| C | -2.85857500 | 2.44690300  | -3.61262500 |
| H | -1.75192100 | 0.62003000  | -3.35360200 |
| C | -3.07359100 | 3.74307900  | -3.14975300 |
| H | -2.48888200 | 5.22533100  | -1.69994200 |
| H | -3.42946200 | 2.06437300  | -4.45401300 |
| H | -3.81048000 | 4.38134400  | -3.62815700 |
| C | 7.17122200  | -2.33694700 | -2.95785700 |
| C | 7.25847100  | -2.86153100 | -1.66849400 |
| C | 6.37280900  | -2.40977700 | -0.69592800 |
| C | 5.31515000  | -0.92744700 | -2.30501500 |
| C | 6.20733700  | -1.37882300 | -3.27640000 |

|   |            |             |             |
|---|------------|-------------|-------------|
| H | 7.86179300 | -2.67699400 | -3.72354000 |
| H | 8.01172200 | -3.60642400 | -1.42744100 |
| H | 4.55509400 | -0.18715000 | -2.54419200 |
| H | 6.15193200 | -0.98508700 | -4.28634600 |
| C | 5.41694600 | -1.44927300 | -1.02233600 |
| C | 4.56751600 | -1.12747100 | 0.18532700  |
| C | 5.36530100 | -1.71894000 | 1.38992100  |
| H | 3.59288600 | -1.59897800 | 0.12168300  |
| C | 6.23933600 | -2.81807800 | 0.75238700  |
| H | 4.67558600 | -2.11852900 | 2.13339500  |
| H | 7.19299300 | -2.90569000 | 1.28128700  |
| H | 5.71017300 | -3.77440300 | 0.83106500  |
| N | 4.36934100 | 0.31401700  | 0.35186000  |
| O | 6.14678600 | -0.75165200 | 2.09147400  |
| C | 5.39523900 | 1.07455700  | 0.84583700  |
| C | 6.60549200 | 0.34551500  | 1.33335100  |
| H | 7.23631300 | 0.03276500  | 0.48951900  |
| H | 7.18481200 | 0.98981700  | 1.99566500  |
| N | 5.08698900 | 2.33167200  | 0.90069800  |
| C | 3.34147600 | 1.15435300  | 0.05918100  |
| N | 3.81057100 | 2.37835700  | 0.39925600  |
| C | 3.07434900 | 3.60482300  | 0.44589900  |
| C | 3.14372900 | 4.46877000  | -0.64566800 |
| C | 2.26915300 | 3.83875200  | 1.56472400  |
| C | 2.34215000 | 5.60971500  | -0.61204100 |

|   |              |              |              |
|---|--------------|--------------|--------------|
| C | 1. 49361900  | 4. 99578000  | 1. 55400100  |
| C | 1. 50658600  | 5. 88087200  | 0. 47187400  |
| H | 2. 36141800  | 6. 29282300  | -1. 45750200 |
| H | 0. 85374600  | 5. 20892500  | 2. 40845400  |
| C | 4. 00550600  | 4. 12799300  | -1. 83162800 |
| H | 5. 04146200  | 3. 94970500  | -1. 52774000 |
| H | 3. 64238800  | 3. 21541400  | -2. 31994400 |
| H | 3. 99085800  | 4. 93494000  | -2. 56684300 |
| C | 2. 20954800  | 2. 83879800  | 2. 68812900  |
| H | 1. 68292600  | 3. 25850000  | 3. 54877300  |
| H | 1. 67745200  | 1. 93042300  | 2. 36988400  |
| H | 3. 21470200  | 2. 54773000  | 3. 00944700  |
| C | 0. 61604300  | 7. 09658700  | 0. 48425600  |
| H | -0. 43499400 | 6. 80263700  | 0. 57765100  |
| H | 0. 85087600  | 7. 74687300  | 1. 33289400  |
| H | 0. 72541700  | 7. 68045900  | -0. 43245000 |
| C | -2. 95510300 | 1. 27436700  | 0. 80898800  |
| C | -1. 65539400 | 1. 66460400  | 1. 16037900  |
| C | -1. 41315900 | 2. 84184000  | 1. 84697800  |
| C | -2. 48951500 | 3. 66363000  | 2. 17401900  |
| C | -3. 78296900 | 3. 27180800  | 1. 83310200  |
| C | -4. 03749100 | 2. 07471000  | 1. 15963300  |
| C | -1. 63341900 | -0. 47677900 | 0. 16194800  |
| C | -0. 73779600 | 0. 59783500  | 0. 74265700  |
| H | -0. 39380400 | 3. 10163000  | 2. 11421000  |

|   |             |             |             |
|---|-------------|-------------|-------------|
| H | -2.32671300 | 4.59477800  | 2.70816200  |
| H | -4.62393000 | 3.90241500  | 2.10455200  |
| H | -5.05570200 | 1.79149100  | 0.92931300  |
| O | 0.31881800  | 0.24401100  | 1.36057600  |
| O | -1.22540800 | -1.57884300 | -0.14999000 |
| N | -2.94043200 | 0.01457400  | 0.13422700  |
| C | -4.14876100 | -0.85670500 | 0.09131400  |
| C | -4.50222300 | -1.14163000 | 1.56492700  |
| C | -5.67513100 | -0.71529600 | 2.18404300  |
| C | -3.53303300 | -1.79196500 | 2.34396900  |
| C | -5.88690900 | -0.94980400 | 3.54430100  |
| H | -6.43306700 | -0.18699800 | 1.61561600  |
| C | -3.74191500 | -2.02279900 | 3.69632400  |
| H | -2.60020900 | -2.11851500 | 1.88950300  |
| C | -4.92665600 | -1.60500700 | 4.30326200  |
| H | -6.80733000 | -0.60613500 | 4.00650900  |
| H | -2.97193100 | -2.52417100 | 4.27450400  |
| H | -5.09218800 | -1.78312000 | 5.36130200  |
| C | -3.86197600 | -2.14904600 | -0.70251800 |
| C | -3.33156400 | -2.03829500 | -1.99248400 |
| C | -4.24253700 | -3.40368200 | -0.23676900 |
| C | -3.14373000 | -3.16121100 | -2.78032500 |
| H | -3.05710300 | -1.05389000 | -2.36437700 |
| C | -4.06948800 | -4.53653400 | -1.03814300 |
| H | -4.67520800 | -3.51231000 | 0.75216200  |

|   |             |             |             |
|---|-------------|-------------|-------------|
| C | -3.51498200 | -4.42115800 | -2.30489200 |
| H | -2.71110600 | -3.05885000 | -3.77066400 |
| H | -4.37320200 | -5.50828400 | -0.65952700 |
| H | -3.37621200 | -5.30148900 | -2.92556200 |
| C | -5.27458400 | -0.19308400 | -0.72252400 |
| C | -6.52389400 | -0.82248900 | -0.78568700 |
| C | -5.05650600 | 0.93630500  | -1.50974600 |
| C | -7.54083200 | -0.30818400 | -1.58036900 |
| H | -6.69238500 | -1.73473300 | -0.21905100 |
| C | -6.07420300 | 1.44762700  | -2.31419800 |
| H | -4.09092500 | 1.42938900  | -1.50035200 |
| C | -7.32098200 | 0.83487600  | -2.34802500 |
| H | -8.50336800 | -0.80951500 | -1.61017300 |
| H | -5.87529500 | 2.33146300  | -2.91367600 |
| H | -8.11364200 | 1.23445500  | -2.97304500 |
| C | 0.59349400  | -3.87556800 | 0.79511400  |
| C | 1.85612300  | -4.35313000 | 0.41667200  |
| C | 1.97090500  | -5.42217500 | -0.49183600 |
| C | 0.80090600  | -5.96312800 | -0.97256600 |
| C | -0.46950100 | -5.45911200 | -0.58176300 |
| C | -0.60665100 | -4.41109800 | 0.29971400  |
| H | 2.94670100  | -5.79060500 | -0.78954500 |
| H | 0.84044800  | -6.78958100 | -1.67501400 |
| H | -1.36413300 | -5.90422600 | -1.00547600 |
| H | -1.57231000 | -3.99771000 | 0.56611300  |



|   |            |             |            |
|---|------------|-------------|------------|
| N | 2.81768800 | -3.61824000 | 1.06477800 |
| N | 2.22042400 | -2.74591100 | 1.81673100 |
| N | 0.90584000 | -2.87510400 | 1.66081000 |
| O | 0.05346800 | -2.14891900 | 2.41568000 |
| H | 0.12115500 | -1.21392900 | 2.04113900 |

#### TS4(RS)

NImag=1 (-82.8859 )

|                                              |              |
|----------------------------------------------|--------------|
| Sum of electronic and zero-point Energies=   | -3189.568738 |
| Sum of electronic and thermal Energies=      | -3189.507340 |
| Sum of electronic and thermal Enthalpies=    | -3189.506396 |
| Sum of electronic and thermal Free Energies= | -3189.666775 |

|   |             |             |             |
|---|-------------|-------------|-------------|
| C | 2.19706700  | -1.30740600 | 0.81393700  |
| O | 2.73308800  | -0.98081000 | 2.05411100  |
| C | 0.92509000  | -1.85048100 | 0.69238100  |
| C | 0.01797000  | -1.95883100 | 1.73655000  |
| H | 0.58603100  | -2.09611200 | -0.30749200 |
| H | 0.38218100  | -1.76309300 | 2.74224600  |
| H | 2.20049000  | -0.24102400 | 2.39507000  |
| C | -1.21945900 | -2.73123700 | 1.65556500  |
| C | -1.68192500 | -3.32915700 | 0.46634600  |
| C | -1.96790400 | -2.94875400 | 2.82702600  |
| C | -2.79626100 | -4.15919200 | 0.47262600  |
| H | -1.15586600 | -3.16752200 | -0.47136800 |
| C | -3.08245100 | -3.78108500 | 2.82928400  |

|   |             |             |             |
|---|-------------|-------------|-------------|
| H | -1.64496200 | -2.47339500 | 3.75082800  |
| C | -3.49541100 | -4.40746100 | 1.65474000  |
| H | -3.11956200 | -4.62086900 | -0.45731900 |
| H | -3.62654400 | -3.94445000 | 3.75535700  |
| H | -4.35432400 | -5.07184800 | 1.65591300  |
| C | 8.14276200  | -0.40452000 | 2.84425400  |
| C | 8.05481600  | 0.79262700  | 2.13795400  |
| C | 6.88281300  | 1.08159500  | 1.44402100  |
| C | 5.89547700  | -1.01241400 | 2.17535100  |
| C | 7.07116100  | -1.30034400 | 2.86388600  |
| H | 9.05354200  | -0.64463100 | 3.38447300  |
| H | 8.89010500  | 1.48733600  | 2.12404700  |
| H | 5.04850500  | -1.69167500 | 2.19590100  |
| H | 7.15523800  | -2.22733100 | 3.42248800  |
| C | 5.81898200  | 0.18300600  | 1.46692300  |
| C | 4.66059200  | 0.69462500  | 0.63807000  |
| C | 5.23229100  | 1.95695800  | -0.11390100 |
| H | 3.80810300  | 0.99863600  | 1.24576500  |
| C | 6.54820700  | 2.30174400  | 0.62415300  |
| H | 4.50289000  | 2.76420900  | -0.05389700 |
| H | 7.32340900  | 2.56457300  | -0.10322700 |
| H | 6.40086200  | 3.17561100  | 1.26863500  |
| N | 4.18076500  | -0.31175800 | -0.30818500 |
| O | 5.44354500  | 1.77008700  | -1.50532100 |
| C | 4.75411400  | -0.44339900 | -1.54360100 |

|   |             |             |             |
|---|-------------|-------------|-------------|
| C | 5.87898200  | 0.47802000  | -1.86978800 |
| H | 6.79624800  | 0.18878100  | -1.33582300 |
| H | 6.06750900  | 0.47566200  | -2.94346100 |
| N | 4.10730100  | -1.27090500 | -2.30026600 |
| C | 3.08314100  | -1.12034100 | -0.27910100 |
| N | 3.08075200  | -1.71102900 | -1.50214700 |
| C | 2.13680300  | -2.66510000 | -1.99315000 |
| C | 2.23580700  | -3.98910800 | -1.55627100 |
| C | 1.10387200  | -2.20429900 | -2.81182200 |
| C | 1.23401900  | -4.87056600 | -1.95284300 |
| C | 0.12853300  | -3.12786500 | -3.18913600 |
| C | 0.17244600  | -4.45475900 | -2.76076500 |
| H | 1.27518300  | -5.90285900 | -1.61236100 |
| H | -0.70077600 | -2.78859300 | -3.80381200 |
| C | 3.35505700  | -4.41635900 | -0.64551800 |
| H | 4.32226500  | -4.06277500 | -1.01597100 |
| H | 3.21148300  | -4.00245900 | 0.35987800  |
| H | 3.39106000  | -5.50469500 | -0.56288500 |
| C | 1.03030200  | -0.75637600 | -3.21364400 |
| H | 0.10267200  | -0.56153800 | -3.75695100 |
| H | 1.04773900  | -0.10521200 | -2.33222200 |
| H | 1.88203800  | -0.48298500 | -3.84502300 |
| C | -0.90919200 | -5.42798500 | -3.15400700 |
| H | -1.25736900 | -5.99658500 | -2.28612000 |
| H | -1.76584000 | -4.90764800 | -3.59056200 |

|   |             |             |             |
|---|-------------|-------------|-------------|
| H | -0.54143700 | -6.14821100 | -3.89281900 |
| C | -2.56539900 | 0.42577500  | 2.26778300  |
| C | -1.26201500 | 0.44906200  | 2.80335600  |
| C | -1.01848200 | 0.57415900  | 4.16414900  |
| C | -2.10222700 | 0.67494000  | 5.02891000  |
| C | -3.39335000 | 0.69967300  | 4.50187000  |
| C | -3.64694800 | 0.59267900  | 3.13221700  |
| C | -1.19088900 | 0.39749200  | 0.43427200  |
| C | -0.33059600 | 0.48236700  | 1.68475400  |
| H | 0.00610300  | 0.60815200  | 4.52351700  |
| H | -1.94713900 | 0.76644500  | 6.09855600  |
| H | -4.24055700 | 0.81791500  | 5.17028800  |
| H | -4.66608600 | 0.65735100  | 2.78107500  |
| O | 0.83505800  | 0.91116200  | 1.64280500  |
| O | -0.74406600 | 0.47515400  | -0.69160300 |
| N | -2.51769500 | 0.30047000  | 0.84176400  |
| C | -3.65213900 | 0.56796600  | -0.08847800 |
| C | -4.92426400 | -0.06551500 | 0.52240100  |
| C | -6.16831800 | 0.56712500  | 0.52223400  |
| C | -4.82386300 | -1.32308000 | 1.13144600  |
| C | -7.28172000 | -0.04663000 | 1.09727200  |
| H | -6.28518200 | 1.55970000  | 0.10748200  |
| C | -5.93233700 | -1.93487200 | 1.70246600  |
| H | -3.85532400 | -1.80916000 | 1.19809600  |
| C | -7.17214700 | -1.29975000 | 1.68649500  |

|   |             |             |             |
|---|-------------|-------------|-------------|
| H | -8.23547400 | 0.47215300  | 1.08898000  |
| H | -5.81324600 | -2.90467800 | 2.17498300  |
| H | -8.03844800 | -1.77199900 | 2.13946200  |
| C | -3.38421700 | -0.10684400 | -1.47427500 |
| C | -2.86484400 | 0.63556700  | -2.54177100 |
| C | -3.66897400 | -1.45401400 | -1.70235800 |
| C | -2.66648200 | 0.06640700  | -3.79303100 |
| H | -2.59997600 | 1.67419400  | -2.38745900 |
| C | -3.45809500 | -2.03431900 | -2.95340400 |
| H | -4.07471100 | -2.07576800 | -0.91607400 |
| C | -2.96971200 | -1.27641200 | -4.01017500 |
| H | -2.27149400 | 0.67737600  | -4.60023600 |
| H | -3.70376300 | -3.08300500 | -3.09745900 |
| H | -2.82830900 | -1.72181100 | -4.99124700 |
| C | -3.80071600 | 2.09319300  | -0.26927000 |
| C | -4.67990000 | 2.59524500  | -1.24033500 |
| C | -3.07352900 | 3.01039300  | 0.48988700  |
| C | -4.84617200 | 3.96234000  | -1.42378800 |
| H | -5.22550500 | 1.90130000  | -1.87424000 |
| C | -3.23595500 | 4.38347700  | 0.30577100  |
| H | -2.36340000 | 2.67606900  | 1.23751300  |
| C | -4.12626400 | 4.86578100  | -0.64383200 |
| H | -5.53472700 | 4.32068200  | -2.18311000 |
| H | -2.64380600 | 5.07165600  | 0.90057300  |
| H | -4.24758000 | 5.93495300  | -0.78908500 |

|   |             |            |             |
|---|-------------|------------|-------------|
| C | 0.64719900  | 3.49359400 | -1.18508700 |
| C | 0.74998700  | 4.80060600 | -0.68970700 |
| C | -0.12064400 | 5.80282100 | -1.15719800 |
| C | -1.05706500 | 5.43484900 | -2.09760200 |
| C | -1.14753800 | 4.10129900 | -2.57956900 |
| C | -0.30117300 | 3.10470400 | -2.14411300 |
| H | -0.04168700 | 6.81824300 | -0.78380000 |
| H | -1.75325100 | 6.17378600 | -2.48165900 |
| H | -1.91497900 | 3.86467100 | -3.31181300 |
| H | -0.36109900 | 2.07940200 | -2.49057000 |
| N | 1.77849200  | 4.85088100 | 0.22222300  |
| N | 2.29555900  | 3.67096900 | 0.30663000  |
| N | 1.64196700  | 2.85457500 | -0.52147200 |
| O | 2.01680300  | 1.56109300 | -0.64022000 |
| H | 1.47991300  | 1.09747500 | 0.06410800  |

#### TS4(SR)

NImag=1 (-61.2181)

|                                              |              |
|----------------------------------------------|--------------|
| Sum of electronic and zero-point Energies=   | -3189.572202 |
| Sum of electronic and thermal Energies=      | -3189.511268 |
| Sum of electronic and thermal Enthalpies=    | -3189.510324 |
| Sum of electronic and thermal Free Energies= | -3189.668249 |

|   |             |            |             |
|---|-------------|------------|-------------|
| C | -1.34447300 | 1.55838000 | -1.35378900 |
| O | -2.14137900 | 0.81695800 | -2.20591500 |
| C | 0.03658600  | 1.52950800 | -1.47109400 |

|   |             |             |             |
|---|-------------|-------------|-------------|
| C | 0.69367000  | 0.59688200  | -2.26928200 |
| H | 0.62434900  | 2.18054000  | -0.82988000 |
| H | 0.06950100  | -0.03337900 | -2.89701000 |
| H | -2.15744500 | -0.11449100 | -1.91451900 |
| C | 2.08863400  | 0.71299000  | -2.69548900 |
| C | 2.89052800  | 1.83136300  | -2.39645500 |
| C | 2.64997800  | -0.29271700 | -3.50400300 |
| C | 4.19122600  | 1.93077900  | -2.87558900 |
| H | 2.47898800  | 2.65019600  | -1.80900700 |
| C | 3.94691800  | -0.18433400 | -3.99472400 |
| H | 2.04685300  | -1.16079100 | -3.76096100 |
| C | 4.72634600  | 0.92881400  | -3.68573200 |
| H | 4.78499600  | 2.80730200  | -2.63191800 |
| H | 4.34880300  | -0.97562700 | -4.62123200 |
| H | 5.73495500  | 1.02182300  | -4.07728300 |
| C | -5.17832700 | -1.53135100 | 2.60525700  |
| C | -6.19996900 | -0.85840600 | 1.93627000  |
| C | -5.86088200 | 0.06323600  | 0.95141100  |
| C | -3.49400900 | -0.36407900 | 1.30818400  |
| C | -3.83841500 | -1.28623400 | 2.29678200  |
| H | -5.42864600 | -2.25724300 | 3.37328600  |
| H | -7.24099600 | -1.05358100 | 2.17802300  |
| H | -2.45022400 | -0.17871400 | 1.06133900  |
| H | -3.05484000 | -1.81855400 | 2.82735400  |
| C | -4.52208500 | 0.29215200  | 0.64008600  |

|   |             |            |             |
|---|-------------|------------|-------------|
| C | -4.40434300 | 1.31276600 | -0.47252400 |
| C | -5.82474400 | 1.96025500 | -0.54859900 |
| H | -4.15843900 | 0.85148800 | -1.42652300 |
| C | -6.75947800 | 0.90276400 | 0.07781500  |
| H | -6.09048800 | 2.17556800 | -1.58445600 |
| H | -7.57909100 | 1.38951900 | 0.61526300  |
| H | -7.19884100 | 0.28465400 | -0.71504200 |
| N | -3.39258000 | 2.32375200 | -0.17383400 |
| O | -5.91582100 | 3.22070000 | 0.10629400  |
| C | -3.66651200 | 3.27604900 | 0.77153700  |
| C | -5.08297300 | 3.38763800 | 1.23483200  |
| H | -5.29233700 | 2.63889900 | 2.01197900  |
| H | -5.26817200 | 4.38342900 | 1.63906900  |
| N | -2.62418600 | 3.97247900 | 1.08398700  |
| C | -2.05393700 | 2.39191300 | -0.45153900 |
| N | -1.61883400 | 3.42615900 | 0.31776100  |
| C | -0.32191100 | 4.02630100 | 0.36510000  |
| C | 0.48908400  | 3.75423400 | 1.46760100  |
| C | 0.06503700  | 4.87211400 | -0.68055000 |
| C | 1.73873700  | 4.37374200 | 1.51004600  |
| C | 1.32629900  | 5.45489100 | -0.59821400 |
| C | 2.17045800  | 5.22244300 | 0.49208200  |
| H | 2.39292500  | 4.17258300 | 2.35447900  |
| H | 1.65287100  | 6.11788000 | -1.39673500 |
| C | 0.02411400  | 2.82346200 | 2.55353200  |



|   |             |             |             |
|---|-------------|-------------|-------------|
| H | -0.82258200 | 3.25525500  | 3.09736600  |
| H | -0.28628200 | 1.86376500  | 2.12950500  |
| H | 0.83631900  | 2.62477500  | 3.25606300  |
| C | -0.84753300 | 5.11877000  | -1.85156000 |
| H | -0.46404900 | 5.92942200  | -2.47468700 |
| H | -0.93369800 | 4.22017700  | -2.47352900 |
| H | -1.85461500 | 5.38651700  | -1.51586100 |
| C | 3.52059600  | 5.89086600  | 0.55892500  |
| H | 4.05606800  | 5.61185700  | 1.47045900  |
| H | 4.14227000  | 5.61415900  | -0.29980800 |
| H | 3.41797100  | 6.98080600  | 0.54745500  |
| C | 2.26502100  | -2.22218700 | -0.97098000 |
| C | 0.91851300  | -2.13618800 | -1.37325800 |
| C | 0.36977000  | -2.97872800 | -2.33180800 |
| C | 1.18761300  | -3.93920900 | -2.91662700 |
| C | 2.51922300  | -4.04288900 | -2.51209700 |
| C | 3.07423600  | -3.20440500 | -1.54244200 |
| C | 1.36092000  | -0.57891800 | 0.35307900  |
| C | 0.27861500  | -1.09587300 | -0.57985800 |
| H | -0.68009300 | -2.88136800 | -2.59529600 |
| H | 0.79251700  | -4.61222700 | -3.67000100 |
| H | 3.15493800  | -4.80170800 | -2.95805700 |
| H | 4.11071200  | -3.33303100 | -1.26609400 |
| O | -0.93775200 | -0.94799600 | -0.32295100 |
| O | 1.18628700  | 0.19108900  | 1.27182600  |

|   |             |              |              |
|---|-------------|--------------|--------------|
| N | 2. 55527200 | -1. 22775500 | 0. 01043500  |
| C | 3. 65244400 | -1. 33709400 | 1. 01798200  |
| C | 3. 15470300 | -2. 35959200 | 2. 05125600  |
| C | 3. 29963500 | -3. 73393900 | 1. 83046200  |
| C | 2. 39280100 | -1. 93863100 | 3. 14792400  |
| C | 2. 72672000 | -4. 66088900 | 2. 69671500  |
| H | 3. 86682000 | -4. 08882500 | 0. 97658900  |
| C | 1. 82178800 | -2. 86667300 | 4. 01384600  |
| H | 2. 23605000 | -0. 87822700 | 3. 31225500  |
| C | 1. 99013300 | -4. 23087700 | 3. 79583900  |
| H | 2. 85712300 | -5. 72182200 | 2. 50688600  |
| H | 1. 23902100 | -2. 51734700 | 4. 86073300  |
| H | 1. 54594400 | -4. 95338200 | 4. 47367700  |
| C | 4. 00226200 | 0. 03713000  | 1. 62138100  |
| C | 3. 87594400 | 1. 19701100  | 0. 85845800  |
| C | 4. 65686200 | 0. 11126000  | 2. 85134900  |
| C | 4. 39250700 | 2. 40305500  | 1. 31139400  |
| H | 3. 38293700 | 1. 15141900  | -0. 10558800 |
| C | 5. 15273500 | 1. 32684200  | 3. 31889700  |
| H | 4. 79173200 | -0. 78592600 | 3. 44843400  |
| C | 5. 02826100 | 2. 47878700  | 2. 54918900  |
| H | 4. 29467000 | 3. 28611400  | 0. 68652700  |
| H | 5. 65251600 | 1. 36435200  | 4. 28211400  |
| H | 5. 43197500 | 3. 42274000  | 2. 90460500  |
| C | 4. 97398600 | -1. 70277300 | 0. 32074600  |

|   |             |             |             |
|---|-------------|-------------|-------------|
| C | 5.94947800  | -2.47315100 | 0.95228200  |
| C | 5.26504500  | -1.12494600 | -0.91866500 |
| C | 7.17624000  | -2.70576900 | 0.33075600  |
| H | 5.75772900  | -2.89662600 | 1.93314700  |
| C | 6.48392400  | -1.36236300 | -1.53932700 |
| H | 4.52017800  | -0.50448900 | -1.40960400 |
| C | 7.44485400  | -2.16091900 | -0.91985500 |
| H | 7.92152400  | -3.31533800 | 0.83256400  |
| H | 6.67816800  | -0.91693600 | -2.51053700 |
| H | 8.39800100  | -2.34795500 | -1.40473900 |
| C | -4.77184000 | -3.10408500 | -0.49662100 |
| C | -5.65384700 | -2.31842700 | -1.25466400 |
| C | -7.04456500 | -2.50488800 | -1.12561800 |
| C | -7.47175200 | -3.46151600 | -0.23261700 |
| C | -6.55660700 | -4.24394600 | 0.52534300  |
| C | -5.19416700 | -4.08983500 | 0.40941200  |
| H | -7.73907800 | -1.92120400 | -1.72104000 |
| H | -8.53499400 | -3.63817300 | -0.10543700 |
| H | -6.95073300 | -4.98657300 | 1.21187200  |
| H | -4.48161100 | -4.67592000 | 0.97786000  |
| N | -4.92425200 | -1.45053400 | -2.02249000 |
| N | -3.66514000 | -1.68244300 | -1.79348200 |
| N | -3.56375300 | -2.64870000 | -0.89183300 |
| O | -2.36670700 | -3.12230500 | -0.48810700 |
| H | -1.79532000 | -2.29743000 | -0.37018500 |

**TS4(SS)**

NImag=1 (-294.7256)

|                                              |              |
|----------------------------------------------|--------------|
| Sum of electronic and zero-point Energies=   | -3189.562121 |
| Sum of electronic and thermal Energies=      | -3189.501275 |
| Sum of electronic and thermal Enthalpies=    | -3189.500331 |
| Sum of electronic and thermal Free Energies= | -3189.660297 |

|   |             |             |             |
|---|-------------|-------------|-------------|
| C | 1.92468000  | 1.02636600  | 0.60830200  |
| O | 1.62527900  | -0.31343100 | 0.62396400  |
| C | 0.97692300  | 1.97320600  | 0.80928000  |
| C | -0.41606400 | 1.60884500  | 0.92909400  |
| H | 1.24959400  | 3.02209900  | 0.78644000  |
| H | -0.54327300 | 0.71889900  | 1.54936000  |
| H | 1.04289100  | -0.39562300 | -0.20542100 |
| C | -1.36340800 | 2.69018000  | 1.29985400  |
| C | -1.22307200 | 3.99722400  | 0.81094900  |
| C | -2.45273700 | 2.40910500  | 2.13186200  |
| C | -2.13565300 | 4.98874400  | 1.15007700  |
| H | -0.40013000 | 4.23727900  | 0.13988500  |
| C | -3.36752600 | 3.40144300  | 2.47021700  |
| H | -2.57442800 | 1.40246000  | 2.52682900  |
| C | -3.21449700 | 4.69594300  | 1.98164700  |
| H | -2.00792600 | 5.99357700  | 0.75658500  |
| H | -4.19909200 | 3.15839500  | 3.12470800  |
| H | -3.92791900 | 5.47046300  | 2.24648700  |

|   |             |              |              |
|---|-------------|--------------|--------------|
| C | 4. 50220400 | -3. 50895700 | -2. 81525700 |
| C | 5. 43925000 | -3. 59725000 | -1. 78838600 |
| C | 5. 32409900 | -2. 74229800 | -0. 69598300 |
| C | 3. 34942700 | -1. 71159800 | -1. 66898800 |
| C | 3. 46357900 | -2. 57767300 | -2. 75397900 |
| H | 4. 57815400 | -4. 17283000 | -3. 67127400 |
| H | 6. 24479300 | -4. 32530700 | -1. 83679300 |
| H | 2. 54089200 | -0. 98549800 | -1. 62939000 |
| H | 2. 73599200 | -2. 52546600 | -3. 55739300 |
| C | 4. 29082500 | -1. 80891500 | -0. 64782600 |
| C | 4. 36483400 | -0. 99684300 | 0. 62656600  |
| C | 5. 73295800 | -1. 39887800 | 1. 28203900  |
| H | 3. 54127800 | -1. 20917400 | 1. 30080000  |
| C | 6. 17105100 | -2. 68665100 | 0. 54930100  |
| H | 5. 58767700 | -1. 57432200 | 2. 34809500  |
| H | 7. 24828700 | -2. 66227900 | 0. 35265300  |
| H | 5. 95860300 | -3. 55110300 | 1. 18707200  |
| N | 4. 33236000 | 0. 44287000  | 0. 33818800  |
| O | 6. 72101200 | -0. 37445000 | 1. 21937300  |
| C | 5. 45903400 | 1. 10767800  | -0. 05674300 |
| C | 6. 74392600 | 0. 34753400  | 0. 00730800  |
| H | 6. 84480700 | -0. 31573100 | -0. 86408200 |
| H | 7. 58928200 | 1. 03547500  | 0. 03735200  |
| N | 5. 21406200 | 2. 35427800  | -0. 32554800 |
| C | 3. 30864400 | 1. 32438600  | 0. 30460700  |

|   |              |             |              |
|---|--------------|-------------|--------------|
| N | 3. 86749200  | 2. 47803900 | -0. 11049100 |
| C | 3. 19115100  | 3. 69956400 | -0. 44204900 |
| C | 2. 49499900  | 3. 75916100 | -1. 65353700 |
| C | 3. 20958400  | 4. 73834600 | 0. 48883800  |
| C | 1. 77621000  | 4. 92621000 | -1. 90741400 |
| C | 2. 47056200  | 5. 88156200 | 0. 18729400  |
| C | 1. 74236900  | 5. 98659000 | -0. 99830300 |
| H | 1. 22140800  | 5. 00578000 | -2. 84030400 |
| H | 2. 45315100  | 6. 70075300 | 0. 90160700  |
| C | 2. 46790900  | 2. 59413900 | -2. 60420500 |
| H | 3. 44859100  | 2. 11143700 | -2. 67143200 |
| H | 1. 73334900  | 1. 84422200 | -2. 27194000 |
| H | 2. 18515200  | 2. 92965900 | -3. 60510600 |
| C | 3. 95840500  | 4. 59136800 | 1. 78656200  |
| H | 3. 88853800  | 5. 50624200 | 2. 37801700  |
| H | 3. 54517100  | 3. 76945000 | 2. 38307500  |
| H | 5. 01512400  | 4. 36959300 | 1. 60932700  |
| C | 0. 92378500  | 7. 21487200 | -1. 30215400 |
| H | 1. 33358200  | 7. 75610700 | -2. 16124400 |
| H | -0. 10735200 | 6. 94124300 | -1. 54847100 |
| H | 0. 90113200  | 7. 89872700 | -0. 45051700 |
| C | -3. 06384800 | 1. 18282500 | -1. 06127300 |
| C | -1. 79444900 | 1. 67455000 | -1. 40507500 |
| C | -1. 65263500 | 2. 87537500 | -2. 07259800 |
| C | -2. 79216400 | 3. 63200600 | -2. 35221300 |

|   |             |             |             |
|---|-------------|-------------|-------------|
| C | -4.03884800 | 3.18489700  | -1.92533200 |
| C | -4.19737800 | 1.95644000  | -1.27433300 |
| C | -1.59439300 | -0.36440700 | -0.24214700 |
| C | -0.76455400 | 0.77512300  | -0.81688400 |
| H | -0.65608900 | 3.22350700  | -2.33583100 |
| H | -2.70603800 | 4.58122000  | -2.87197700 |
| H | -4.91947300 | 3.79356300  | -2.10535000 |
| H | -5.18335000 | 1.62969000  | -0.97037400 |
| O | 0.33187400  | 0.43669300  | -1.40850800 |
| O | -1.13288000 | -1.34212100 | 0.33287600  |
| N | -2.92633700 | -0.12271300 | -0.49227800 |
| C | -3.97824100 | -1.05863400 | -0.01942900 |
| C | -4.15540800 | -0.76012500 | 1.47902900  |
| C | -5.06152000 | 0.20984500  | 1.91733900  |
| C | -3.29760300 | -1.34548700 | 2.42074500  |
| C | -5.15127600 | 0.54523200  | 3.26645900  |
| H | -5.71018400 | 0.70917600  | 1.20473700  |
| C | -3.37117100 | -0.99039600 | 3.76505800  |
| H | -2.55840900 | -2.07092800 | 2.09940200  |
| C | -4.30689500 | -0.05285000 | 4.19664800  |
| H | -5.87939600 | 1.28545000  | 3.58523100  |
| H | -2.68987900 | -1.45292000 | 4.47258500  |
| H | -4.37132800 | 0.21455900  | 5.24685000  |
| C | -3.56225100 | -2.51869700 | -0.32280900 |
| C | -2.84742200 | -2.82806800 | -1.48360500 |

|   |             |             |             |
|---|-------------|-------------|-------------|
| C | -4.05501500 | -3.56599100 | 0.45506000  |
| C | -2.61668500 | -4.14908100 | -1.84512200 |
| H | -2.45573400 | -2.03049400 | -2.10770900 |
| C | -3.81042300 | -4.89218000 | 0.10139400  |
| H | -4.63690000 | -3.35128000 | 1.34607800  |
| C | -3.09097100 | -5.19136400 | -1.04968300 |
| H | -2.05566600 | -4.36257200 | -2.75034500 |
| H | -4.19302100 | -5.69066800 | 0.72953500  |
| H | -2.90377600 | -6.22418100 | -1.32739800 |
| C | -5.26511800 | -0.93988000 | -0.85929800 |
| C | -6.51051900 | -1.24483300 | -0.30651200 |
| C | -5.18820800 | -0.71275300 | -2.23772200 |
| C | -7.65665500 | -1.26657800 | -1.09883500 |
| H | -6.59167500 | -1.47638100 | 0.75040800  |
| C | -6.33119800 | -0.72921000 | -3.02758100 |
| H | -4.22681300 | -0.50963500 | -2.69860800 |
| C | -7.57465700 | -0.99874300 | -2.46025900 |
| H | -8.61436800 | -1.49983900 | -0.64388800 |
| H | -6.24676500 | -0.53424800 | -4.09209600 |
| H | -8.46763600 | -1.01177300 | -3.07721800 |
| C | 1.26474800  | -3.75690000 | 1.02424800  |
| C | 2.57974500  | -4.23705900 | 0.97537800  |
| C | 2.94492200  | -5.19266700 | 0.00979500  |
| C | 1.96031000  | -5.61667000 | -0.85439500 |
| C | 0.63091200  | -5.12104700 | -0.77667400 |



|   |             |             |             |
|---|-------------|-------------|-------------|
| C | 0.24708800  | -4.18309300 | 0.15670400  |
| H | 3.96260600  | -5.56442500 | -0.04479100 |
| H | 2.19969900  | -6.34829800 | -1.61979000 |
| H | -0.10889200 | -5.49292900 | -1.47866200 |
| H | -0.75910300 | -3.78077400 | 0.21329000  |
| N | 3.31435200  | -3.61029900 | 1.95405300  |
| N | 2.53282900  | -2.78198000 | 2.57735600  |
| N | 1.32132000  | -2.86103800 | 2.04274400  |
| O | 0.31093700  | -2.09978700 | 2.51855500  |
| H | 0.13257000  | -1.45758500 | 1.79244800  |

#### IM4(RR)

NImag=0

|                                              |              |
|----------------------------------------------|--------------|
| Sum of electronic and zero-point Energies=   | -3189.590045 |
| Sum of electronic and thermal Energies=      | -3189.529444 |
| Sum of electronic and thermal Enthalpies=    | -3189.528500 |
| Sum of electronic and thermal Free Energies= | -3189.686512 |

|   |             |             |             |
|---|-------------|-------------|-------------|
| C | 2.16857000  | -0.89756400 | -1.44028900 |
| O | 1.92630400  | -0.91316400 | -2.68933700 |
| C | 1.36389000  | -0.50992900 | -0.40002200 |
| C | 0.00452900  | 0.04997800  | -0.72180100 |
| H | 1.66352500  | -0.69340600 | 0.63046800  |
| H | 0.08705900  | 0.56330400  | -1.69250300 |
| H | 0.13334500  | -1.52526100 | -2.50517800 |
| C | -0.46410100 | 1.06761500  | 0.29910900  |

|   |             |             |             |
|---|-------------|-------------|-------------|
| C | -0.45213700 | 0.79545200  | 1.67279100  |
| C | -0.91959100 | 2.31885800  | -0.12857200 |
| C | -0.87653900 | 1.75588900  | 2.58895500  |
| H | -0.10860800 | -0.17032200 | 2.03456000  |
| C | -1.34063600 | 3.28183300  | 0.78658500  |
| H | -0.95924700 | 2.52726600  | -1.19650900 |
| C | -1.31351800 | 3.00469300  | 2.15078900  |
| H | -0.85184100 | 1.52616400  | 3.65019800  |
| H | -1.69114000 | 4.24704700  | 0.43194900  |
| H | -1.62474400 | 3.75733800  | 2.86953600  |
| C | 3.33185100  | 4.14455200  | -1.67068000 |
| C | 4.66795100  | 3.74958600  | -1.63096500 |
| C | 4.99510600  | 2.46231600  | -2.03629200 |
| C | 2.66459400  | 1.97907700  | -2.53126900 |
| C | 2.33921300  | 3.26848800  | -2.11257500 |
| H | 3.06276900  | 5.15410400  | -1.37181900 |
| H | 5.43904100  | 4.44027600  | -1.30183900 |
| H | 1.91489100  | 1.28880500  | -2.90578500 |
| H | 1.30522200  | 3.59768100  | -2.14632400 |
| C | 3.99833300  | 1.58407500  | -2.47242300 |
| C | 4.61786100  | 0.27218000  | -2.90248500 |
| C | 6.09195700  | 0.68605500  | -3.14305000 |
| H | 4.12900200  | -0.19254500 | -3.75891200 |
| C | 6.35402400  | 1.81621300  | -2.12386700 |
| H | 6.14482600  | 1.10279800  | -4.15171400 |

|   |             |              |              |
|---|-------------|--------------|--------------|
| H | 6. 64630500 | 1. 41603300  | -1. 14422700 |
| H | 7. 14741400 | 2. 49129400  | -2. 45470700 |
| N | 4. 63607700 | -0. 74582100 | -1. 82091100 |
| O | 6. 99872900 | -0. 39507100 | -3. 14378500 |
| C | 5. 76083200 | -1. 37028000 | -1. 35412500 |
| C | 7. 11695300 | -1. 06033800 | -1. 90972700 |
| H | 7. 69160200 | -0. 47193200 | -1. 18191500 |
| H | 7. 65541800 | -1. 99181900 | -2. 09473500 |
| N | 5. 47527600 | -2. 22000100 | -0. 41246000 |
| C | 3. 59460400 | -1. 24535200 | -1. 12545500 |
| N | 4. 11956800 | -2. 12809800 | -0. 27911500 |
| C | 3. 43957500 | -2. 95548400 | 0. 68147800  |
| C | 3. 75983000 | -2. 76509500 | 2. 03218900  |
| C | 2. 52704000 | -3. 91253600 | 0. 23184400  |
| C | 3. 10517400 | -3. 57122700 | 2. 95727000  |
| C | 1. 91841800 | -4. 70663300 | 1. 20766600  |
| C | 2. 18603100 | -4. 54728800 | 2. 56447400  |
| H | 3. 31727600 | -3. 42961300 | 4. 01448500  |
| H | 1. 19726800 | -5. 45574300 | 0. 88747200  |
| C | 4. 78432700 | -1. 75270700 | 2. 47229500  |
| H | 5. 79446100 | -2. 16168200 | 2. 36537000  |
| H | 4. 72122500 | -0. 83459100 | 1. 88309100  |
| H | 4. 61767100 | -1. 48207800 | 3. 51684400  |
| C | 2. 14279000 | -4. 07526500 | -1. 21500300 |
| H | 1. 89607600 | -5. 11998300 | -1. 41960800 |

|   |             |             |             |
|---|-------------|-------------|-------------|
| H | 1.25814700  | -3.46693300 | -1.44831000 |
| H | 2.94120700  | -3.77271500 | -1.89840200 |
| C | 1.51102600  | -5.41473200 | 3.59586800  |
| H | 1.10491800  | -4.80851600 | 4.41155100  |
| H | 0.69294300  | -5.99054100 | 3.15548600  |
| H | 2.22194700  | -6.12229500 | 4.03591300  |
| C | -2.84845300 | -1.37576000 | 0.47438000  |
| C | -1.53395900 | -1.77114600 | 0.21641600  |
| C | -0.86900200 | -2.65357700 | 1.04400000  |
| C | -1.53190400 | -3.15474000 | 2.16546500  |
| C | -2.84282700 | -2.76191200 | 2.42218600  |
| C | -3.52185100 | -1.87117900 | 1.58568100  |
| C | -2.32793400 | -0.39618900 | -1.53068200 |
| C | -1.04134600 | -1.07682400 | -1.01076100 |
| H | 0.15494900  | -2.93356100 | 0.81760400  |
| H | -1.02701300 | -3.84826900 | 2.83188600  |
| H | -3.36100600 | -3.15366400 | 3.29245200  |
| H | -4.54017000 | -1.58342800 | 1.81100600  |
| O | -0.53699100 | -1.98212800 | -1.95329200 |
| O | -2.42903800 | 0.10576300  | -2.62568000 |
| N | -3.29666600 | -0.46857200 | -0.52713400 |
| C | -4.72368800 | -0.08486600 | -0.65714500 |
| C | -5.48676500 | -1.39361000 | -0.93815800 |
| C | -6.44717000 | -1.94377600 | -0.09178700 |
| C | -5.12558900 | -2.10652200 | -2.09061600 |

|   |             |             |             |
|---|-------------|-------------|-------------|
| C | -7.05092600 | -3.16435800 | -0.39643400 |
| H | -6.72869200 | -1.43266600 | 0.82245300  |
| C | -5.72802500 | -3.31927200 | -2.39612000 |
| H | -4.36889900 | -1.69369300 | -2.75462900 |
| C | -6.69956800 | -3.85316200 | -1.54935700 |
| H | -7.79361800 | -3.57470800 | 0.28114300  |
| H | -5.43544500 | -3.85198900 | -3.29574100 |
| H | -7.17023300 | -4.80270100 | -1.78552600 |
| C | -4.92569500 | 0.95991700  | -1.77868800 |
| C | -4.19908200 | 2.15439000  | -1.71550300 |
| C | -5.90210100 | 0.82167100  | -2.75951300 |
| C | -4.40938500 | 3.16267300  | -2.64100100 |
| H | -3.45894300 | 2.28185700  | -0.92970600 |
| C | -6.12341200 | 1.84394400  | -3.68616200 |
| H | -6.49952100 | -0.08159700 | -2.81539000 |
| C | -5.37610300 | 3.01088600  | -3.63751400 |
| H | -3.82292600 | 4.07542400  | -2.58513500 |
| H | -6.88709700 | 1.71511200  | -4.44730300 |
| H | -5.54500700 | 3.80159800  | -4.36219200 |
| C | -5.18148000 | 0.67332400  | 0.60397200  |
| C | -6.53327600 | 1.00852400  | 0.74430300  |
| C | -4.27018000 | 1.17384900  | 1.53378600  |
| C | -6.97048800 | 1.77272400  | 1.81907000  |
| H | -7.24466400 | 0.68435000  | -0.01105600 |
| C | -4.70776200 | 1.94724000  | 2.60767100  |

|   |             |            |            |
|---|-------------|------------|------------|
| H | -3.20931900 | 0.97250300 | 1.42083100 |
| C | -6.05742800 | 2.24023800 | 2.76314200 |
| H | -8.02487000 | 2.01559200 | 1.91087100 |
| H | -3.97635800 | 2.32159500 | 3.31821400 |
| H | -6.39615000 | 2.84048700 | 3.60216500 |
| C | 2.31798000  | 2.77356800 | 2.37663000 |
| C | 1.98340600  | 2.35884800 | 3.67217100 |
| C | 1.45166200  | 3.27854100 | 4.59240600 |
| C | 1.27475700  | 4.57413300 | 4.15704900 |
| C | 1.61429700  | 4.96953700 | 2.83618900 |
| C | 2.14424800  | 4.08656400 | 1.91994100 |
| H | 1.18933500  | 2.96445200 | 5.59721600 |
| H | 0.86474400  | 5.31651300 | 4.83430300 |
| H | 1.44788800  | 6.00157700 | 2.54291200 |
| H | 2.40296900  | 4.36653100 | 0.90548600 |
| N | 2.23354100  | 1.01092300 | 3.78585300 |
| N | 2.70774000  | 0.59551700 | 2.65956500 |
| N | 2.76591600  | 1.62569900 | 1.81201200 |
| O | 3.31707100  | 1.48571700 | 0.58307800 |
| H | 2.60987500  | 1.06343300 | 0.02481300 |

#### IM4(RS)

NImag=0

Sum of electronic and zero-point Energies= -3189.587521

Sum of electronic and thermal Energies= -3189.526878

Sum of electronic and thermal Enthalpies= -3189.525934

Sum of electronic and thermal Free Energies= -3189.684510

|   |             |             |             |
|---|-------------|-------------|-------------|
| C | 2.06374100  | -0.92526900 | -0.95000000 |
| O | 2.33839400  | -0.94155100 | -2.19260500 |
| C | 1.17453200  | -0.11663900 | -0.28779500 |
| C | 0.34457800  | 0.86923900  | -1.07563900 |
| H | 0.88359800  | -0.35501700 | 0.72878400  |
| H | 0.98187400  | 1.26901500  | -1.87940200 |
| H | 0.60050000  | -0.89209500 | -2.67156000 |
| C | -0.14446000 | 2.03711300  | -0.23441700 |
| C | -0.60631400 | 1.86440500  | 1.07623000  |
| C | -0.14080900 | 3.32528900  | -0.77545500 |
| C | -1.02832700 | 2.95985300  | 1.82598500  |
| H | -0.64671600 | 0.87125900  | 1.51792900  |
| C | -0.57863900 | 4.41676200  | -0.03160500 |
| H | 0.23170500  | 3.47783300  | -1.78470900 |
| C | -1.01736400 | 4.23844100  | 1.27656700  |
| H | -1.36973600 | 2.80712100  | 2.84471500  |
| H | -0.54863100 | 5.41066700  | -0.46857400 |
| H | -1.33129600 | 5.09288000  | 1.86908800  |
| C | 7.28535600  | 1.50317900  | -1.16729100 |
| C | 7.84935700  | 0.23087400  | -1.20633000 |
| C | 7.01258300  | -0.86992600 | -1.35832800 |
| C | 5.06556600  | 0.57851700  | -1.45628700 |
| C | 5.90623800  | 1.67651400  | -1.29440600 |

|   |            |             |             |
|---|------------|-------------|-------------|
| H | 7.92698200 | 2.37145400  | -1.04913700 |
| H | 8.92508700 | 0.09912800  | -1.12546400 |
| H | 3.99791900 | 0.72050900  | -1.59182300 |
| H | 5.47284300 | 2.67076700  | -1.27971500 |
| C | 5.63346500 | -0.69343300 | -1.47080600 |
| C | 4.92240000 | -2.01619300 | -1.64245500 |
| C | 6.08944800 | -3.05796000 | -1.79618800 |
| H | 4.24042700 | -2.01134100 | -2.49168700 |
| C | 7.40536500 | -2.31952500 | -1.45452000 |
| H | 6.10074500 | -3.37136800 | -2.84112100 |
| H | 7.83877800 | -2.69321400 | -0.51949600 |
| H | 8.15652800 | -2.49493300 | -2.23055600 |
| N | 4.07406700 | -2.37272700 | -0.47609300 |
| O | 5.90885400 | -4.26518900 | -1.07687900 |
| C | 4.42065900 | -3.30400100 | 0.46006100  |
| C | 5.68764500 | -4.07531300 | 0.30032800  |
| H | 6.52181300 | -3.55161500 | 0.78634100  |
| H | 5.57808000 | -5.05807700 | 0.76059800  |
| N | 3.49683500 | -3.44401300 | 1.36320200  |
| C | 2.85726800 | -1.90004700 | -0.12778500 |
| N | 2.52682900 | -2.55989100 | 0.98772500  |
| C | 1.28992200 | -2.56068600 | 1.73210000  |
| C | 1.28811000 | -1.94618300 | 2.98870200  |
| C | 0.18424600 | -3.21476000 | 1.19277500  |
| C | 0.11712400 | -2.03249900 | 3.73384800  |



|   |             |             |             |
|---|-------------|-------------|-------------|
| C | -0.96238000 | -3.28210800 | 1.98695700  |
| C | -1.00795000 | -2.71375500 | 3.25560400  |
| H | 0.08364900  | -1.56480900 | 4.71572100  |
| H | -1.85091400 | -3.76384800 | 1.58146000  |
| C | 2.50180200  | -1.20856900 | 3.49015400  |
| H | 3.36882400  | -1.87329500 | 3.55952100  |
| H | 2.77165400  | -0.38239600 | 2.82037100  |
| H | 2.31169900  | -0.78888200 | 4.48042500  |
| C | 0.18635300  | -3.75460300 | -0.20953500 |
| H | -0.61580000 | -4.48542400 | -0.33288500 |
| H | 0.00647900  | -2.93430900 | -0.91800700 |
| H | 1.13565000  | -4.23738600 | -0.46549700 |
| C | -2.24323700 | -2.84802700 | 4.10971600  |
| H | -2.46014800 | -1.92184300 | 4.65093700  |
| H | -3.11519100 | -3.10405600 | 3.50081300  |
| H | -2.11156000 | -3.63841700 | 4.85740000  |
| C | -3.04893800 | 0.95954000  | -2.09504500 |
| C | -1.73598600 | 1.08131400  | -2.56971400 |
| C | -1.42485400 | 1.96402900  | -3.58496300 |
| C | -2.43002000 | 2.78101400  | -4.10751400 |
| C | -3.71909100 | 2.69725600  | -3.59417500 |
| C | -4.05286100 | 1.78828800  | -2.58516400 |
| C | -1.80468800 | -0.43075800 | -0.76896300 |
| C | -0.82804700 | 0.14990100  | -1.80531800 |
| H | -0.40561500 | 2.02453100  | -3.95878300 |

|   |             |             |             |
|---|-------------|-------------|-------------|
| H | -2.20461000 | 3.48541100  | -4.90151500 |
| H | -4.49710600 | 3.34572800  | -3.98543800 |
| H | -5.07155500 | 1.73976400  | -2.22334000 |
| O | -0.38082300 | -0.92374100 | -2.60276000 |
| O | -1.50415200 | -1.11537900 | 0.18598400  |
| N | -3.09509800 | -0.07416300 | -1.11285600 |
| C | -4.22017800 | -0.51131800 | -0.26053700 |
| C | -4.16051700 | 0.35746400  | 1.00834900  |
| C | -4.65055200 | 1.66743800  | 0.97233600  |
| C | -3.50760700 | -0.07533200 | 2.16689900  |
| C | -4.56178700 | 2.49732000  | 2.08504400  |
| H | -5.11654700 | 2.04433600  | 0.06709900  |
| C | -3.42224700 | 0.75454900  | 3.28225700  |
| H | -3.04790300 | -1.05799600 | 2.18830400  |
| C | -3.96716200 | 2.03438100  | 3.25477000  |
| H | -4.95804700 | 3.50671900  | 2.03343800  |
| H | -2.91633300 | 0.39797400  | 4.17561400  |
| H | -3.90692600 | 2.67597400  | 4.12928600  |
| C | -4.12264800 | -2.03186000 | 0.01332200  |
| C | -3.47419100 | -2.90035000 | -0.86876400 |
| C | -4.84872100 | -2.58057600 | 1.07188900  |
| C | -3.53322800 | -4.27749000 | -0.67926600 |
| H | -2.90764800 | -2.50655400 | -1.70814100 |
| C | -4.89727900 | -3.95903700 | 1.26984800  |
| H | -5.39102200 | -1.92553000 | 1.74817400  |

|   |             |             |             |
|---|-------------|-------------|-------------|
| C | -4.23754500 | -4.81653200 | 0.39511700  |
| H | -3.02224000 | -4.93164400 | -1.38007800 |
| H | -5.46561500 | -4.35912200 | 2.10470800  |
| H | -4.27959400 | -5.89135000 | 0.54190600  |
| C | -5.55045300 | -0.41968000 | -1.03199300 |
| C | -6.74419300 | -0.06496100 | -0.40473000 |
| C | -5.59383200 | -0.84293000 | -2.36518800 |
| C | -7.94898300 | -0.08904500 | -1.10713900 |
| H | -6.74227100 | 0.23419600  | 0.63825000  |
| C | -6.79200300 | -0.86130400 | -3.06615400 |
| H | -4.67582500 | -1.14715900 | -2.86051800 |
| C | -7.97757800 | -0.47769500 | -2.44067400 |
| H | -8.86605200 | 0.19767900  | -0.60140300 |
| H | -6.79975600 | -1.17802800 | -4.10452200 |
| H | -8.91468700 | -0.49118200 | -2.98844900 |
| C | 2.52601800  | 3.86463700  | 1.34313700  |
| C | 2.53896800  | 4.92921700  | 0.43201300  |
| C | 2.18786400  | 6.22265500  | 0.85676100  |
| C | 1.84217400  | 6.37907400  | 2.18165000  |
| C | 1.83796900  | 5.28464400  | 3.08667900  |
| C | 2.17718100  | 4.00864800  | 2.69266600  |
| H | 2.19017700  | 7.05242000  | 0.15781000  |
| H | 1.56434600  | 7.36107900  | 2.55120100  |
| H | 1.55413400  | 5.46326200  | 4.11934900  |
| H | 2.16658500  | 3.15982300  | 3.36651000  |

|   |            |            |             |
|---|------------|------------|-------------|
| N | 2.90240800 | 4.45067200 | -0.80367700 |
| N | 3.12509100 | 3.18173900 | -0.69167900 |
| N | 2.90452800 | 2.81812600 | 0.57176500  |
| O | 3.15648400 | 1.55795600 | 0.99172300  |
| H | 2.46899600 | 0.97722500 | 0.54793100  |

#### IM4(SR)

NImag=0

|                                              |              |
|----------------------------------------------|--------------|
| Sum of electronic and zero-point Energies=   | -3189.598333 |
| Sum of electronic and thermal Energies=      | -3189.537560 |
| Sum of electronic and thermal Enthalpies=    | -3189.536616 |
| Sum of electronic and thermal Free Energies= | -3189.695641 |

|   |             |             |             |
|---|-------------|-------------|-------------|
| C | -1.73694400 | 1.78148600  | -1.50674200 |
| O | -2.23835700 | 0.93062300  | -2.34787800 |
| C | -0.41939800 | 2.03284400  | -1.30021100 |
| C | 0.63412100  | 1.30291200  | -2.09653500 |
| H | -0.10309300 | 2.73910600  | -0.55175300 |
| H | 0.32647300  | 1.28502200  | -3.15325100 |
| H | -1.30516500 | -0.12727100 | -2.14180100 |
| C | 1.99998900  | 1.96121900  | -1.99436800 |
| C | 2.42340300  | 2.58523700  | -0.81616300 |
| C | 2.87983000  | 1.93526900  | -3.08046800 |
| C | 3.67784600  | 3.18561800  | -0.73389600 |
| H | 1.77687700  | 2.59087400  | 0.05823900  |
| C | 4.13617200  | 2.53177900  | -3.00211900 |

|   |             |             |             |
|---|-------------|-------------|-------------|
| H | 2.57388200  | 1.43970700  | -3.99836000 |
| C | 4.53739200  | 3.16744200  | -1.82934800 |
| H | 3.98575500  | 3.65916900  | 0.19526100  |
| H | 4.79777700  | 2.50471000  | -3.86265100 |
| H | 5.51301500  | 3.64066900  | -1.76737600 |
| C | -3.28267300 | -2.01461900 | 2.70123700  |
| C | -4.61733000 | -1.81178800 | 2.35378900  |
| C | -4.91398900 | -1.00766500 | 1.25747700  |
| C | -2.54710300 | -0.61912500 | 0.86217600  |
| C | -2.25574200 | -1.42763000 | 1.95981600  |
| H | -3.03983000 | -2.64368000 | 3.55258200  |
| H | -5.41267900 | -2.28949500 | 2.92043100  |
| H | -1.73458900 | -0.18404700 | 0.28635500  |
| H | -1.21723000 | -1.58107500 | 2.23982900  |
| C | -3.88298700 | -0.41146800 | 0.53589900  |
| C | -4.42049800 | 0.45809200  | -0.57754600 |
| C | -5.98080400 | 0.38294800  | -0.42580700 |
| H | -4.07472000 | 0.15716500  | -1.56540600 |
| C | -6.25136700 | -0.71988300 | 0.62658400  |
| H | -6.42617900 | 0.13355700  | -1.38825500 |
| H | -7.02283400 | -0.39317100 | 1.33326200  |
| H | -6.62413500 | -1.61576500 | 0.11803900  |
| N | -3.94841400 | 1.84751000  | -0.34856200 |
| O | -6.57818900 | 1.62644300  | -0.07327500 |
| C | -4.57449200 | 2.65779200  | 0.55580500  |

|   |             |            |             |
|---|-------------|------------|-------------|
| C | -5.94617200 | 2.27095000 | 1.00563500  |
| H | -5.88064500 | 1.62108400 | 1.89132500  |
| H | -6.52578400 | 3.15910900 | 1.26106800  |
| N | -3.84341200 | 3.68287100 | 0.87827300  |
| C | -2.73788800 | 2.39184800 | -0.59347400 |
| N | -2.69528500 | 3.50251900 | 0.15697800  |
| C | -1.55033200 | 4.32933500 | 0.42302900  |
| C | -0.71943300 | 3.94204700 | 1.47836100  |
| C | -1.28879600 | 5.41911200 | -0.40593300 |
| C | 0.42448400  | 4.70925700 | 1.69396400  |
| C | -0.12956200 | 6.14795300 | -0.15092700 |
| C | 0.73984300  | 5.80201800 | 0.88523600  |
| H | 1.09254200  | 4.43126600 | 2.50603100  |
| H | 0.10781500  | 6.99872600 | -0.78552100 |
| C | -0.98852900 | 2.69080100 | 2.27202200  |
| H | -2.04261800 | 2.60787000 | 2.55438600  |
| H | -0.71905300 | 1.80052400 | 1.68609200  |
| H | -0.38243800 | 2.67438700 | 3.18080500  |
| C | -2.20254700 | 5.74318500 | -1.55660700 |
| H | -1.93087800 | 6.69898700 | -2.00916900 |
| H | -2.13042000 | 4.96796500 | -2.32837500 |
| H | -3.24655700 | 5.79512000 | -1.23303700 |
| C | 2.01755000  | 6.57282300 | 1.09321200  |
| H | 2.42305300  | 6.41063800 | 2.09507000  |
| H | 2.77447300  | 6.25382900 | 0.36768000  |

|   |              |              |              |
|---|--------------|--------------|--------------|
| H | 1. 86132800  | 7. 64637400  | 0. 95500300  |
| C | 2. 75450300  | -1. 36523000 | -1. 58272400 |
| C | 1. 72480100  | -0. 99488000 | -2. 44845700 |
| C | 1. 71843400  | -1. 39173300 | -3. 77274200 |
| C | 2. 78258100  | -2. 16096400 | -4. 24737400 |
| C | 3. 81301300  | -2. 52150500 | -3. 38366300 |
| C | 3. 81547700  | -2. 13787700 | -2. 03971700 |
| C | 1. 20876800  | -0. 33918600 | -0. 23836500 |
| C | 0. 69103600  | -0. 21290800 | -1. 69194400 |
| H | 0. 88442300  | -1. 12209800 | -4. 41639300 |
| H | 2. 79998800  | -2. 48917500 | -5. 28139200 |
| H | 4. 63551200  | -3. 12676000 | -3. 75232400 |
| H | 4. 62371800  | -2. 44152300 | -1. 38708500 |
| O | -0. 57825300 | -0. 79806300 | -1. 78668600 |
| O | 0. 56801600  | -0. 04244500 | 0. 74811500  |
| N | 2. 49529600  | -0. 86533500 | -0. 27224400 |
| C | 3. 27332600  | -1. 31367200 | 0. 91024100  |
| C | 3. 01087200  | -2. 82817800 | 1. 03586600  |
| C | 3. 99035100  | -3. 81415400 | 0. 93335600  |
| C | 1. 67664600  | -3. 23100500 | 1. 19396900  |
| C | 3. 65140900  | -5. 16608000 | 1. 01356300  |
| H | 5. 02866400  | -3. 54189700 | 0. 77782900  |
| C | 1. 33932000  | -4. 57433200 | 1. 28628100  |
| H | 0. 89586500  | -2. 47647300 | 1. 25404300  |
| C | 2. 33054500  | -5. 55177400 | 1. 19796300  |

|   |            |             |             |
|---|------------|-------------|-------------|
| H | 4.43139800 | -5.91600800 | 0.92345400  |
| H | 0.29863100 | -4.85341900 | 1.42567200  |
| H | 2.07119700 | -6.60396600 | 1.26459300  |
| C | 2.83807900 | -0.53611700 | 2.17700400  |
| C | 2.97084500 | 0.85672100  | 2.16766900  |
| C | 2.42882600 | -1.15938000 | 3.35124300  |
| C | 2.64619700 | 1.61148900  | 3.28292600  |
| H | 3.33813400 | 1.34303400  | 1.26903000  |
| C | 2.10972200 | -0.39939900 | 4.48008500  |
| H | 2.35046700 | -2.23947500 | 3.40240500  |
| C | 2.20449500 | 0.98433200  | 4.44992800  |
| H | 2.75702900 | 2.69232500  | 3.25012200  |
| H | 1.78817500 | -0.90429200 | 5.38615400  |
| H | 1.95504500 | 1.57109100  | 5.32893700  |
| C | 4.75193500 | -0.91806700 | 0.74159600  |
| C | 5.68113800 | -1.35627500 | 1.69237000  |
| C | 5.17069200 | -0.00753300 | -0.22981100 |
| C | 7.00698900 | -0.94389900 | 1.63699900  |
| H | 5.35322600 | -2.00865800 | 2.49766300  |
| C | 6.49816300 | 0.41486000  | -0.27804700 |
| H | 4.46431300 | 0.39148200  | -0.95176300 |
| C | 7.42408000 | -0.05938700 | 0.64407900  |
| H | 7.71181700 | -1.30312100 | 2.38064600  |
| H | 6.79686000 | 1.12351100  | -1.04520000 |
| H | 8.45853800 | 0.26755800  | 0.60202500  |



|   |             |             |             |
|---|-------------|-------------|-------------|
| C | -2.84235700 | -3.94178700 | -0.98840100 |
| C | -4.17206800 | -3.62346300 | -0.68716800 |
| C | -4.85274500 | -4.33542000 | 0.31619900  |
| C | -4.15626300 | -5.32706600 | 0.97294500  |
| C | -2.80673700 | -5.62974500 | 0.65056000  |
| C | -2.12179700 | -4.95170000 | -0.33558300 |
| H | -5.88591800 | -4.10399800 | 0.55679800  |
| H | -4.64603800 | -5.89791300 | 1.75549300  |
| H | -2.30667900 | -6.42759100 | 1.19192900  |
| H | -1.09614700 | -5.17589200 | -0.60687500 |
| N | -4.57317700 | -2.59820000 | -1.51221400 |
| N | -3.58147300 | -2.29534500 | -2.28973400 |
| N | -2.54762800 | -3.07638200 | -1.98776100 |
| O | -1.40390700 | -3.05167600 | -2.70370900 |
| H | -0.92412600 | -2.22746800 | -2.37761000 |

#### IM4(SS)

NImag=0

Sum of electronic and zero-point Energies= -3189.599290

Sum of electronic and thermal Energies= -3189.538834

Sum of electronic and thermal Enthalpies= -3189.537890

Sum of electronic and thermal Free Energies= -3189.696520

|   |             |             |            |
|---|-------------|-------------|------------|
| C | 2.01619500  | 0.93638700  | 0.59917100 |
| O | 2.00963700  | -0.37488800 | 0.55107700 |
| C | 0.94477600  | 1.71966400  | 0.86410400 |
| C | -0.35730500 | 1.02920200  | 1.16362900 |

|   |             |             |             |
|---|-------------|-------------|-------------|
| H | 1.02589500  | 2.79990400  | 0.89033500  |
| H | -0.11135600 | 0.10009000  | 1.69773000  |
| H | 0.56919600  | -0.51021400 | -0.49470400 |
| C | -1.31639300 | 1.82007200  | 2.03234300  |
| C | -1.48433500 | 3.20107900  | 1.88973900  |
| C | -2.07672300 | 1.14953600  | 2.99438300  |
| C | -2.38282300 | 3.89513400  | 2.69299900  |
| H | -0.91902800 | 3.74342700  | 1.13626600  |
| C | -2.96608700 | 1.84593200  | 3.80867600  |
| H | -1.96602900 | 0.07327700  | 3.10676500  |
| C | -3.12414300 | 3.21975800  | 3.65916700  |
| H | -2.50171700 | 4.96715700  | 2.56484700  |
| H | -3.53472600 | 1.30746700  | 4.55910000  |
| H | -3.81857800 | 3.76344700  | 4.29309300  |
| C | 5.42244100  | -3.16087700 | -2.49230300 |
| C | 6.36244100  | -3.00221100 | -1.47809100 |
| C | 6.09150300  | -2.11237800 | -0.44201300 |
| C | 3.94336300  | -1.56207900 | -1.43393100 |
| C | 4.21971600  | -2.45080100 | -2.46814300 |
| H | 5.61884500  | -3.85626700 | -3.30326000 |
| H | 7.28788500  | -3.57093500 | -1.48745100 |
| H | 2.99679000  | -1.03293300 | -1.38346100 |
| H | 3.48364000  | -2.60712300 | -3.25033300 |
| C | 4.89571500  | -1.40043100 | -0.42909800 |
| C | 4.82168100  | -0.50773000 | 0.79203900  |

|   |            |             |             |
|---|------------|-------------|-------------|
| C | 6.24802300 | -0.59622300 | 1.44236000  |
| H | 4.06648100 | -0.81745900 | 1.50709500  |
| C | 6.90781200 | -1.83159800 | 0.79132000  |
| H | 6.15003900 | -0.71483100 | 2.52158000  |
| H | 7.96740200 | -1.63614700 | 0.59549600  |
| H | 6.83704800 | -2.68948900 | 1.47017300  |
| N | 4.51151500 | 0.87780800  | 0.40331300  |
| O | 7.02383400 | 0.58931100  | 1.28945100  |
| C | 5.48879700 | 1.71033900  | -0.06069500 |
| C | 6.89889900 | 1.22321600  | 0.03678200  |
| H | 7.12532400 | 0.54073600  | -0.79541400 |
| H | 7.59249700 | 2.06446100  | 0.01126100  |
| N | 5.00004400 | 2.84889900  | -0.45446500 |
| C | 3.33698100 | 1.52776400  | 0.28453400  |
| N | 3.65416200 | 2.71823700  | -0.24336200 |
| C | 2.77125800 | 3.74342800  | -0.72771100 |
| C | 2.08645400 | 3.51725700  | -1.92202500 |
| C | 2.67119700 | 4.92804700  | 0.00745300  |
| C | 1.27320400 | 4.55335500  | -2.38812300 |
| C | 1.83328400 | 5.91945400  | -0.49245000 |
| C | 1.12801900 | 5.74887800  | -1.68777100 |
| H | 0.72514200 | 4.40599400  | -3.31649300 |
| H | 1.72998000 | 6.84995500  | 0.06126300  |
| C | 2.15250600 | 2.19921800  | -2.64575500 |
| H | 3.14898100 | 1.74916000  | -2.58646500 |

|   |             |             |             |
|---|-------------|-------------|-------------|
| H | 1.43127900  | 1.49001900  | -2.21348700 |
| H | 1.90143400  | 2.33196300  | -3.70056000 |
| C | 3.43219200  | 5.09882300  | 1.29524800  |
| H | 3.19780000  | 6.06009300  | 1.75658700  |
| H | 3.17717500  | 4.30688200  | 2.00889200  |
| H | 4.51192500  | 5.04985400  | 1.12278300  |
| C | 0.21080300  | 6.83466700  | -2.18874100 |
| H | 0.69456000  | 7.81460400  | -2.13941300 |
| H | -0.09120600 | 6.65318000  | -3.22323400 |
| H | -0.69642600 | 6.88535900  | -1.57667800 |
| C | -3.22356900 | 1.10281400  | -0.88698300 |
| C | -1.88915800 | 1.52946800  | -0.85709200 |
| C | -1.51328400 | 2.75021300  | -1.37867100 |
| C | -2.49076700 | 3.59519100  | -1.90683300 |
| C | -3.82332000 | 3.19856900  | -1.87802600 |
| C | -4.21316100 | 1.95522000  | -1.36995700 |
| C | -2.10658600 | -0.53233600 | 0.26323200  |
| C | -1.04999500 | 0.51336900  | -0.14248400 |
| H | -0.46959300 | 3.04998200  | -1.34528000 |
| H | -2.21369000 | 4.56098000  | -2.31980500 |
| H | -4.59149700 | 3.86299900  | -2.26207100 |
| H | -5.26028300 | 1.68361200  | -1.37164400 |
| O | -0.14580000 | -0.09928500 | -1.03339000 |
| O | -1.89076700 | -1.49947900 | 0.96303200  |
| N | -3.30698000 | -0.21380600 | -0.34857900 |

|   |             |             |             |
|---|-------------|-------------|-------------|
| C | -4.49591200 | -1.07059800 | -0.13979600 |
| C | -4.94637200 | -0.82082100 | 1.30917400  |
| C | -5.61590700 | 0.36751900  | 1.62554000  |
| C | -4.59813000 | -1.68534500 | 2.34913900  |
| C | -6.00100100 | 0.64490900  | 2.93185400  |
| H | -5.84739700 | 1.08220300  | 0.84055700  |
| C | -4.97856500 | -1.40486400 | 3.66058600  |
| H | -4.01855500 | -2.57579700 | 2.13429000  |
| C | -5.70024000 | -0.25281200 | 3.95360800  |
| H | -6.52882500 | 1.56812900  | 3.15125100  |
| H | -4.70748000 | -2.09581900 | 4.45316300  |
| H | -6.00682600 | -0.04293100 | 4.97449000  |
| C | -4.15731900 | -2.54666200 | -0.44983300 |
| C | -3.09418800 | -2.90906800 | -1.27917700 |
| C | -5.05302900 | -3.53714000 | -0.04081800 |
| C | -2.92303400 | -4.23462100 | -1.66656800 |
| H | -2.38719800 | -2.16154800 | -1.62771700 |
| C | -4.87279800 | -4.86410300 | -0.41675400 |
| H | -5.90768600 | -3.26587500 | 0.57300000  |
| C | -3.80374900 | -5.22037700 | -1.23286900 |
| H | -2.09475300 | -4.49537200 | -2.31853900 |
| H | -5.57749100 | -5.61692000 | -0.07677100 |
| H | -3.66195600 | -6.25388400 | -1.53302000 |
| C | -5.57512900 | -0.77061500 | -1.19777300 |
| C | -6.93326700 | -0.72769500 | -0.88671800 |

|   |             |             |             |
|---|-------------|-------------|-------------|
| C | -5.19238500 | -0.67125200 | -2.54069000 |
| C | -7.88498300 | -0.54232600 | -1.89071800 |
| H | -7.26171800 | -0.83795900 | 0.14106600  |
| C | -6.13774100 | -0.47995300 | -3.53833000 |
| H | -4.13914100 | -0.73439000 | -2.80090100 |
| C | -7.49292100 | -0.40733300 | -3.21598200 |
| H | -8.93743500 | -0.50671100 | -1.62592700 |
| H | -5.81606000 | -0.39148300 | -4.57143100 |
| H | -8.23437400 | -0.25889400 | -3.99482600 |
| C | 2.40645100  | -3.59442500 | 0.76772000  |
| C | 3.49894700  | -4.41302800 | 0.44579900  |
| C | 3.41829200  | -5.29331500 | -0.64790900 |
| C | 2.24295400  | -5.29638300 | -1.36656400 |
| C | 1.15263700  | -4.45216600 | -1.02211700 |
| C | 1.20027300  | -3.58522800 | 0.04827300  |
| H | 4.26021200  | -5.92574600 | -0.90924200 |
| H | 2.13909400  | -5.95822300 | -2.22085800 |
| H | 0.24726400  | -4.49721300 | -1.61884400 |
| H | 0.36748400  | -2.94408900 | 0.32489100  |
| N | 4.52291400  | -4.14767000 | 1.32203900  |
| N | 4.12608600  | -3.21920000 | 2.13397900  |
| N | 2.87045000  | -2.89181000 | 1.82781600  |
| O | 2.22135000  | -1.94120900 | 2.53634900  |
| H | 2.03933100  | -1.21960600 | 1.83835100  |

**TS5(RR)**

NImag=1 (-802.8793)

|                                              |              |
|----------------------------------------------|--------------|
| Sum of electronic and zero-point Energies=   | -3189.579521 |
| Sum of electronic and thermal Energies=      | -3189.518819 |
| Sum of electronic and thermal Enthalpies=    | -3189.517875 |
| Sum of electronic and thermal Free Energies= | -3189.677718 |

|   |             |             |             |
|---|-------------|-------------|-------------|
| C | 2.10046000  | -1.37315000 | -0.41198500 |
| O | 1.93556700  | -1.95448300 | -1.48301000 |
| C | 1.22662700  | -0.42525500 | 0.22259500  |
| C | -0.12601100 | -0.25623000 | -0.44947400 |
| H | 1.23363300  | -0.43735000 | 1.31595300  |
| H | 0.03832400  | -0.38096600 | -1.52889300 |
| H | -0.08235900 | -2.66813900 | -1.10283600 |
| C | -0.70634400 | 1.12964400  | -0.23917000 |
| C | -0.81597800 | 1.69895100  | 1.03511700  |
| C | -1.12957600 | 1.87384000  | -1.34296700 |
| C | -1.33869000 | 2.97981100  | 1.19503400  |
| H | -0.47639800 | 1.15148300  | 1.91033300  |
| C | -1.65494800 | 3.15558700  | -1.18513800 |
| H | -1.04461100 | 1.43878800  | -2.33714700 |
| C | -1.75958000 | 3.71222000  | 0.08567500  |
| H | -1.38732700 | 3.41458100  | 2.18874200  |
| H | -1.96912600 | 3.72182000  | -2.05736700 |
| H | -2.14313400 | 4.72042100  | 0.21046000  |
| C | 6.79969300  | 1.64617000  | -3.57071300 |

|   |            |             |             |
|---|------------|-------------|-------------|
| C | 7.19146500 | 0.35055700  | -3.90400700 |
| C | 6.48587600 | -0.72115800 | -3.36747000 |
| C | 5.00411900 | 0.79944100  | -2.17733200 |
| C | 5.71978200 | 1.86813600  | -2.71436800 |
| H | 7.34578100 | 2.49236100  | -3.97656700 |
| H | 8.03795900 | 0.18118500  | -4.56363800 |
| H | 4.17401400 | 0.99451900  | -1.49980200 |
| H | 5.43208700 | 2.88205100  | -2.45472700 |
| C | 5.40413000 | -0.48743900 | -2.52071200 |
| C | 4.79552300 | -1.79749400 | -2.06701200 |
| C | 5.86776400 | -2.87476300 | -2.45602300 |
| H | 3.83142600 | -2.00537400 | -2.53042600 |
| C | 6.70762700 | -2.20113300 | -3.56337100 |
| H | 5.38413300 | -3.78903600 | -2.80278300 |
| H | 7.75411500 | -2.50935300 | -3.47542200 |
| H | 6.35470400 | -2.52220300 | -4.55051500 |
| N | 4.58475800 | -1.80098400 | -0.61285600 |
| O | 6.66769600 | -3.30000800 | -1.36026400 |
| C | 5.65395200 | -1.92727000 | 0.22479700  |
| C | 6.95884200 | -2.31398400 | -0.39042200 |
| H | 7.46076200 | -1.43848200 | -0.82432200 |
| H | 7.60758500 | -2.76728100 | 0.35972300  |
| N | 5.30201300 | -1.77988700 | 1.46839700  |
| C | 3.50968900 | -1.53441300 | 0.15389600  |
| N | 3.96709700 | -1.52053300 | 1.40629000  |



|   |              |              |             |
|---|--------------|--------------|-------------|
| C | 3. 24495600  | -1. 24900300 | 2. 62328800 |
| C | 3. 51360300  | -0. 03546800 | 3. 26299200 |
| C | 2. 33482400  | -2. 19778800 | 3. 09257200 |
| C | 2. 78112900  | 0. 23777800  | 4. 41513200 |
| C | 1. 65959800  | -1. 88406600 | 4. 27153700 |
| C | 1. 85159900  | -0. 66754500 | 4. 92843300 |
| H | 2. 92965800  | 1. 19536200  | 4. 90704300 |
| H | 0. 94477500  | -2. 60167500 | 4. 67006800 |
| C | 4. 54341200  | 0. 92240100  | 2. 73046100 |
| H | 5. 55119900  | 0. 51512400  | 2. 86402800 |
| H | 4. 37318600  | 1. 11751200  | 1. 66573200 |
| H | 4. 46969500  | 1. 87576400  | 3. 25463200 |
| C | 2. 03622300  | -3. 46636500 | 2. 33612800 |
| H | 1. 58085800  | -4. 20355300 | 3. 00136800 |
| H | 1. 32436300  | -3. 28216400 | 1. 51772800 |
| H | 2. 94125300  | -3. 90970100 | 1. 90859400 |
| C | 1. 03813700  | -0. 31749800 | 6. 14704700 |
| H | 0. 65419100  | -1. 21440800 | 6. 64088200 |
| H | 1. 62953800  | 0. 24982800  | 6. 87054300 |
| H | 0. 18122900  | 0. 30345800  | 5. 86281400 |
| C | -3. 11135400 | -0. 92079500 | 1. 08229100 |
| C | -1. 77335900 | -1. 28452600 | 1. 25494000 |
| C | -1. 24388200 | -1. 48976500 | 2. 51284300 |
| C | -2. 05775300 | -1. 30044500 | 3. 63065900 |
| C | -3. 38628800 | -0. 92416600 | 3. 45718500 |

|   |             |             |             |
|---|-------------|-------------|-------------|
| C | -3.93590800 | -0.73567600 | 2.18596000  |
| C | -2.33199700 | -1.27979800 | -1.03496900 |
| C | -1.12160500 | -1.40105300 | -0.08453600 |
| H | -0.20894800 | -1.79396200 | 2.61811000  |
| H | -1.65672100 | -1.45308100 | 4.62857000  |
| H | -4.02274200 | -0.77814600 | 4.32471500  |
| H | -4.97423500 | -0.45186500 | 2.07967400  |
| O | -0.50545200 | -2.65794100 | -0.22561300 |
| O | -2.28055500 | -1.56506400 | -2.20997600 |
| N | -3.41955300 | -0.81383900 | -0.30357900 |
| C | -4.81318700 | -0.68003600 | -0.79824700 |
| C | -5.53391400 | -1.97286500 | -0.37035300 |
| C | -6.58848000 | -2.02602200 | 0.53855300  |
| C | -5.02779700 | -3.17843200 | -0.87787600 |
| C | -7.13986300 | -3.25068100 | 0.91861600  |
| H | -6.98751400 | -1.11302000 | 0.96711200  |
| C | -5.57745100 | -4.39634500 | -0.50262400 |
| H | -4.19814100 | -3.14978700 | -1.58095600 |
| C | -6.64144100 | -4.43740100 | 0.39834700  |
| H | -7.95979000 | -3.26801700 | 1.63036000  |
| H | -5.17195500 | -5.31694900 | -0.91107900 |
| H | -7.07112900 | -5.38926400 | 0.69547800  |
| C | -4.83888300 | -0.47200100 | -2.32975400 |
| C | -4.10415600 | 0.59129000  | -2.86487800 |
| C | -5.66817400 | -1.20509700 | -3.17216600 |

|   |             |             |             |
|---|-------------|-------------|-------------|
| C | -4.15874200 | 0.88148000  | -4.21793600 |
| H | -3.48512200 | 1.19207100  | -2.20407200 |
| C | -5.73283200 | -0.90496000 | -4.53523200 |
| H | -6.27130800 | -2.01646700 | -2.77982400 |
| C | -4.97537300 | 0.12937100  | -5.06462900 |
| H | -3.56805400 | 1.70209900  | -4.61531800 |
| H | -6.38238600 | -1.49174800 | -5.17791100 |
| H | -5.02316000 | 0.35787800  | -6.12504200 |
| C | -5.43315100 | 0.62414500  | -0.26168800 |
| C | -6.79363400 | 0.87192800  | -0.47727000 |
| C | -4.64858400 | 1.63803000  | 0.28918000  |
| C | -7.36683000 | 2.07854600  | -0.09415100 |
| H | -7.40223100 | 0.11914700  | -0.97186800 |
| C | -5.22206400 | 2.85121500  | 0.66492600  |
| H | -3.58023600 | 1.49551900  | 0.42197100  |
| C | -6.58276800 | 3.07297500  | 0.48810800  |
| H | -8.42566400 | 2.24752100  | -0.26555200 |
| H | -4.58573200 | 3.62125100  | 1.09128900  |
| H | -7.02870100 | 4.01755600  | 0.78462100  |
| C | 1.81715100  | 3.83442200  | 0.19153000  |
| C | 1.37453800  | 4.51537700  | 1.33590000  |
| C | 0.81052900  | 5.79985000  | 1.20957800  |
| C | 0.71563300  | 6.32928600  | -0.05904200 |
| C | 1.16611100  | 5.61691000  | -1.20453200 |
| C | 1.72441700  | 4.36166100  | -1.10506900 |

|   |            |            |             |
|---|------------|------------|-------------|
| H | 0.46432700 | 6.33899600 | 2.08581200  |
| H | 0.28504200 | 7.31654400 | -0.19694300 |
| H | 1.05938200 | 6.07830500 | -2.18173500 |
| H | 2.05971000 | 3.79420300 | -1.96634600 |
| N | 1.57189000 | 3.71426700 | 2.42676300  |
| N | 2.11557900 | 2.60449900 | 2.00779000  |
| N | 2.28050800 | 2.66217600 | 0.68863800  |
| O | 2.81706200 | 1.65777100 | 0.00131900  |
| H | 1.93231700 | 0.62891600 | 0.04577000  |

### TS5(RS)

NImag=1 (-926.7107)

|                                              |              |
|----------------------------------------------|--------------|
| Sum of electronic and zero-point Energies=   | -3189.580610 |
| Sum of electronic and thermal Energies=      | -3189.520478 |
| Sum of electronic and thermal Enthalpies=    | -3189.519534 |
| Sum of electronic and thermal Free Energies= | -3189.675002 |

|   |             |             |             |
|---|-------------|-------------|-------------|
| C | 1.81540700  | -1.04103100 | -1.20821500 |
| O | 1.97287300  | -1.42362100 | -2.37484000 |
| C | 1.02915400  | 0.04603000  | -0.73100800 |
| C | 0.23476400  | 0.82528100  | -1.77782000 |
| H | 0.51639500  | -0.14844300 | 0.21821800  |
| H | 0.87410100  | 0.91076500  | -2.66745200 |
| H | 0.23893300  | -1.18649100 | -3.09521700 |
| C | -0.01485700 | 2.23497900  | -1.27695300 |
| C | -0.85903400 | 2.49709000  | -0.19520300 |

|   |             |             |             |
|---|-------------|-------------|-------------|
| C | 0.63777100  | 3.30326400  | -1.89575200 |
| C | -1.04972600 | 3.80441700  | 0.24366100  |
| H | -1.36265200 | 1.68187700  | 0.32269000  |
| C | 0.44906700  | 4.61036400  | -1.45559200 |
| H | 1.30282400  | 3.10521300  | -2.73382700 |
| C | -0.39909700 | 4.86415500  | -0.38345400 |
| H | -1.69688600 | 3.98889300  | 1.09494200  |
| H | 0.97262000  | 5.42716100  | -1.94426900 |
| H | -0.53643600 | 5.87814500  | -0.02063600 |
| C | 7.89788600  | 1.31280300  | -0.96172300 |
| C | 8.16090900  | 0.12149200  | -1.63649500 |
| C | 7.12123000  | -0.78123200 | -1.83037300 |
| C | 5.56711000  | 0.69891900  | -0.68357700 |
| C | 6.61639200  | 1.59625700  | -0.48762700 |
| H | 8.70115300  | 2.02408100  | -0.79549700 |
| H | 9.16225600  | -0.10203600 | -1.99369300 |
| H | 4.57835400  | 0.92765800  | -0.28952600 |
| H | 6.42956100  | 2.52204700  | 0.04739000  |
| C | 5.84248500  | -0.48293300 | -1.36183700 |
| C | 4.88803600  | -1.61210500 | -1.69428700 |
| C | 5.83374900  | -2.80714200 | -2.05832100 |
| H | 4.21466300  | -1.37787900 | -2.52094400 |
| C | 7.14311600  | -2.12917500 | -2.50992600 |
| H | 5.39121200  | -3.42505600 | -2.84127000 |
| H | 8.00025700  | -2.75158200 | -2.23690200 |

|   |             |             |             |
|---|-------------|-------------|-------------|
| H | 7.15161200  | -2.01616700 | -3.60084900 |
| N | 4.05314200  | -1.97638000 | -0.54872900 |
| O | 6.04785500  | -3.70740200 | -0.97725000 |
| C | 4.59682800  | -2.64827600 | 0.50668500  |
| C | 5.98834300  | -3.16211100 | 0.32813500  |
| H | 6.72589100  | -2.36305900 | 0.47869100  |
| H | 6.18180800  | -3.97271600 | 1.03098700  |
| N | 3.72038700  | -2.83371700 | 1.44890600  |
| C | 2.77228900  | -1.71129100 | -0.23345900 |
| N | 2.59067000  | -2.23136800 | 0.97727200  |
| C | 1.38743500  | -2.27769100 | 1.77017000  |
| C | 1.39147900  | -1.57257400 | 2.97646400  |
| C | 0.32974700  | -3.07688500 | 1.33124400  |
| C | 0.24660700  | -1.67806700 | 3.76086100  |
| C | -0.79163600 | -3.14240400 | 2.15661900  |
| C | -0.84664900 | -2.45543500 | 3.37022300  |
| H | 0.21145000  | -1.13708900 | 4.70403700  |
| H | -1.64277700 | -3.74008600 | 1.83498800  |
| C | 2.58799100  | -0.77782100 | 3.42563300  |
| H | 3.35642800  | -1.44274200 | 3.83542100  |
| H | 3.02057200  | -0.21114100 | 2.59489400  |
| H | 2.29049100  | -0.06278200 | 4.19476400  |
| C | 0.38853700  | -3.85131400 | 0.04134900  |
| H | -0.42375100 | -4.58130100 | 0.01308500  |
| H | 0.25262300  | -3.18889200 | -0.81921400 |

|   |             |             |             |
|---|-------------|-------------|-------------|
| H | 1.33933100  | -4.38571600 | -0.06599000 |
| C | -2.07787300 | -2.52348400 | 4.23591100  |
| H | -2.72267500 | -1.65579500 | 4.04916600  |
| H | -2.65995400 | -3.42311800 | 4.02064100  |
| H | -1.81488600 | -2.51989000 | 5.29759000  |
| C | -3.27390000 | 0.84706900  | -2.17549800 |
| C | -2.07599200 | 1.01815500  | -2.87816000 |
| C | -1.95129400 | 1.97892700  | -3.86188200 |
| C | -3.03336100 | 2.81814600  | -4.12967900 |
| C | -4.20555700 | 2.68148700  | -3.39482000 |
| C | -4.34846900 | 1.69960700  | -2.40976100 |
| C | -1.81851700 | -0.65249500 | -1.24020300 |
| C | -1.02891000 | 0.08586100  | -2.33882700 |
| H | -1.01156000 | 2.08460700  | -4.39685500 |
| H | -2.95470600 | 3.58381900  | -4.89438300 |
| H | -5.04081000 | 3.34845900  | -3.58570700 |
| H | -5.28150100 | 1.61708600  | -1.86954600 |
| O | -0.64777500 | -0.85046100 | -3.32445000 |
| O | -1.34742800 | -1.48173800 | -0.48854800 |
| N | -3.14630000 | -0.25973800 | -1.27979000 |
| C | -4.09384900 | -0.63136900 | -0.19661800 |
| C | -3.74328100 | 0.30829300  | 0.96730400  |
| C | -4.29699700 | 1.58644500  | 1.07428700  |
| C | -2.68540700 | -0.03577900 | 1.81964200  |
| C | -3.82215600 | 2.48634600  | 2.02836100  |

|   |             |             |             |
|---|-------------|-------------|-------------|
| H | -5.09972500 | 1.89246700  | 0.41162300  |
| C | -2.19507100 | 0.87134800  | 2.75224200  |
| H | -2.20948500 | -1.00476500 | 1.71332200  |
| C | -2.76623600 | 2.13686500  | 2.86360900  |
| H | -4.26851900 | 3.47452900  | 2.09596700  |
| H | -1.33430600 | 0.60939500  | 3.36050300  |
| H | -2.35766300 | 2.84796400  | 3.57476900  |
| C | -3.97288000 | -2.12730800 | 0.17145600  |
| C | -3.60494000 | -3.08983900 | -0.77120300 |
| C | -4.40896000 | -2.55468500 | 1.42604800  |
| C | -3.63971000 | -4.44257100 | -0.45347700 |
| H | -3.27345300 | -2.78057900 | -1.75778200 |
| C | -4.45719800 | -3.91155500 | 1.74163400  |
| H | -4.72161100 | -1.82237600 | 2.16555400  |
| C | -4.06521300 | -4.86299000 | 0.80629400  |
| H | -3.33603200 | -5.17259700 | -1.19824800 |
| H | -4.80730300 | -4.22012400 | 2.72261400  |
| H | -4.09863900 | -5.92053500 | 1.04983300  |
| C | -5.54409100 | -0.55472700 | -0.70175800 |
| C | -6.59482800 | -0.24828400 | 0.16316800  |
| C | -5.84346100 | -0.94925200 | -2.00940700 |
| C | -7.91483900 | -0.29117400 | -0.28242200 |
| H | -6.38582500 | 0.02395700  | 1.19296500  |
| C | -7.15900700 | -0.98987300 | -2.45429500 |
| H | -5.03586300 | -1.21054400 | -2.68736800 |



|   |             |             |             |
|---|-------------|-------------|-------------|
| C | -8.20203000 | -0.65414200 | -1.59326800 |
| H | -8.71848500 | -0.04163800 | 0.40375300  |
| H | -7.36921400 | -1.28437400 | -3.47792100 |
| H | -9.22997900 | -0.68336700 | -1.94103900 |
| C | 2.05715800  | 3.44546900  | 1.61663800  |
| C | 1.07733400  | 3.71228300  | 2.58440600  |
| C | 0.82112000  | 5.04113100  | 2.97353300  |
| C | 1.56342900  | 6.03257200  | 2.37024300  |
| C | 2.55232400  | 5.73757600  | 1.39162600  |
| C | 2.82002200  | 4.44570700  | 0.99691300  |
| H | 0.06321000  | 5.26112300  | 3.71907500  |
| H | 1.39433000  | 7.07003500  | 2.64254600  |
| H | 3.10337900  | 6.55849500  | 0.94250800  |
| H | 3.55642100  | 4.20090100  | 0.23911800  |
| N | 0.50707800  | 2.53070600  | 2.96773800  |
| N | 1.08702200  | 1.57434400  | 2.29594000  |
| N | 2.01721600  | 2.09594800  | 1.49949500  |
| O | 2.77743200  | 1.33661300  | 0.71287500  |
| H | 1.94048500  | 0.78056600  | -0.17437700 |

### TS5(SR)

NImag=(-1025.7400)

Sum of electronic and zero-point Energies= -3189.589224

Sum of electronic and thermal Energies= -3189.529016

Sum of electronic and thermal Enthalpies= -3189.528072

Sum of electronic and thermal Free Energies= -3189.685553

|   |             |             |            |
|---|-------------|-------------|------------|
| C | 2.13017100  | 0.21980300  | 1.58780800 |
| O | 2.26893500  | -0.71018100 | 2.39635100 |
| C | 0.93766800  | 0.97344100  | 1.33916900 |
| C | -0.30785100 | 0.38144700  | 1.98079300 |
| H | 0.80901600  | 1.28948800  | 0.30593400 |
| H | -0.01870400 | -0.00371300 | 2.96899500 |
| H | 0.84460800  | -1.77128800 | 1.56692400 |
| C | -1.41236800 | 1.40291100  | 2.19477500 |
| C | -1.60319500 | 2.46968000  | 1.31125900 |
| C | -2.27145800 | 1.28638300  | 3.29360100 |
| C | -2.61972700 | 3.39845700  | 1.52615400 |
| H | -0.95073900 | 2.58261500  | 0.44810700 |
| C | -3.28511300 | 2.21649900  | 3.51338100 |
| H | -2.13203400 | 0.46185900  | 3.98902900 |
| C | -3.46139200 | 3.27833400  | 2.62864600 |
| H | -2.74884800 | 4.22275400  | 0.83047000 |
| H | -3.93362600 | 2.11183200  | 4.37828700 |
| H | -4.24607300 | 4.00944200  | 2.79879300 |
| C | 5.77596100  | -4.78926800 | 0.74354400 |
| C | 6.70879100  | -4.10132000 | 1.51719500 |
| C | 6.40149200  | -2.81736700 | 1.95825000 |
| C | 4.23441100  | -2.92602900 | 0.86239400 |
| C | 4.54812200  | -4.20804900 | 0.41792800 |
| H | 6.00645600  | -5.78877200 | 0.38786100 |

|   |            |             |             |
|---|------------|-------------|-------------|
| H | 7.66266700 | -4.55828400 | 1.76535800  |
| H | 3.27758700 | -2.46874400 | 0.62122500  |
| H | 3.83257700 | -4.75984400 | -0.18310400 |
| C | 5.17515100 | -2.24575600 | 1.62795400  |
| C | 5.05988400 | -0.85863000 | 2.21384600  |
| C | 6.50308500 | -0.50975500 | 2.71431500  |
| H | 4.35206200 | -0.80179100 | 3.03670800  |
| C | 7.22288900 | -1.87714600 | 2.80809800  |
| H | 6.42648500 | 0.00438800  | 3.67227400  |
| H | 8.26050700 | -1.77526800 | 2.47438800  |
| H | 7.24980200 | -2.22006200 | 3.84874200  |
| N | 4.61822400 | 0.09984900  | 1.19159100  |
| O | 7.21059300 | 0.40124600  | 1.88331600  |
| C | 5.51379600 | 0.61074900  | 0.30220700  |
| C | 6.95530000 | 0.27879400  | 0.50300300  |
| H | 7.17484900 | -0.73198000 | 0.12882600  |
| H | 7.58185000 | 1.00080000  | -0.02125800 |
| N | 4.93653000 | 1.39842600  | -0.55810500 |
| C | 3.41034000 | 0.59867800  | 0.86782700  |
| N | 3.62418900 | 1.37582700  | -0.19630900 |
| C | 2.68308900 | 2.13551800  | -0.98073000 |
| C | 1.88154000 | 1.44967300  | -1.89423800 |
| C | 2.65570000 | 3.52028500  | -0.79371900 |
| C | 0.98993600 | 2.21493700  | -2.64830800 |
| C | 1.76965000 | 4.23519600  | -1.59329200 |

|   |             |             |             |
|---|-------------|-------------|-------------|
| C | 0.94222000  | 3.60388700  | -2.52584900 |
| H | 0.32278100  | 1.71071100  | -3.34311500 |
| H | 1.72871100  | 5.31704900  | -1.48852600 |
| C | 1.95339500  | -0.04858300 | -2.02663400 |
| H | 2.99246300  | -0.38954100 | -2.09767500 |
| H | 1.47028600  | -0.54221000 | -1.17393100 |
| H | 1.41881700  | -0.37193000 | -2.92161600 |
| C | 3.53555700  | 4.19219600  | 0.22504900  |
| H | 3.40014700  | 5.27497700  | 0.18276500  |
| H | 3.27868400  | 3.85345900  | 1.23488400  |
| H | 4.59127700  | 3.96791800  | 0.04466700  |
| C | 0.04757400  | 4.43479500  | -3.40929400 |
| H | -0.59910200 | 5.08934800  | -2.81557200 |
| H | 0.64730100  | 5.07767000  | -4.06244400 |
| H | -0.58343700 | 3.80349000  | -4.03780400 |
| C | -3.11590300 | -1.43488700 | 1.20891600  |
| C | -1.92460000 | -1.57872000 | 1.91967800  |
| C | -1.87529800 | -2.28522900 | 3.10684400  |
| C | -3.04867500 | -2.86511100 | 3.59340100  |
| C | -4.23589600 | -2.72138900 | 2.88085700  |
| C | -4.29159300 | -2.00760300 | 1.68107300  |
| C | -1.52888100 | -0.43839300 | -0.11574400 |
| C | -0.82234100 | -0.86778500 | 1.18771800  |
| H | -0.93551600 | -2.38683600 | 3.64534100  |
| H | -3.03553300 | -3.42890700 | 4.52030900  |

|   |             |             |             |
|---|-------------|-------------|-------------|
| H | -5.14732600 | -3.17356500 | 3.25939300  |
| H | -5.22950700 | -1.90728500 | 1.15158100  |
| O | 0.23525400  | -1.71926600 | 0.80899000  |
| O | -0.95518600 | 0.00229000  | -1.08784100 |
| N | -2.89302100 | -0.66662700 | 0.03002700  |
| C | -3.91615800 | -0.57298100 | -1.04111100 |
| C | -4.11062200 | -2.01362400 | -1.55368400 |
| C | -5.29417100 | -2.74111900 | -1.44864200 |
| C | -2.98210400 | -2.64835200 | -2.09273900 |
| C | -5.35788900 | -4.06420700 | -1.88981000 |
| H | -6.17823400 | -2.28993600 | -1.01159700 |
| C | -3.04521500 | -3.96278200 | -2.53352800 |
| H | -2.04864200 | -2.09503900 | -2.16923400 |
| C | -4.23920200 | -4.67767500 | -2.43675300 |
| H | -6.28992400 | -4.61279800 | -1.79428100 |
| H | -2.15940800 | -4.43251600 | -2.94968400 |
| H | -4.29045800 | -5.70672200 | -2.77868700 |
| C | -3.47682900 | 0.39010900  | -2.16737400 |
| C | -3.14436600 | 1.70475900  | -1.82193700 |
| C | -3.55350900 | 0.04899400  | -3.51363200 |
| C | -2.86504200 | 2.64529300  | -2.79783500 |
| H | -3.11259800 | 1.98437700  | -0.77269900 |
| C | -3.27811300 | 0.99991300  | -4.50053000 |
| H | -3.83228900 | -0.95591600 | -3.81041500 |
| C | -2.93240200 | 2.29659100  | -4.14977400 |

|   |             |             |             |
|---|-------------|-------------|-------------|
| H | -2.60786200 | 3.65954200  | -2.50647500 |
| H | -3.34660900 | 0.71630000  | -5.54641600 |
| H | -2.73323300 | 3.03799700  | -4.91855000 |
| C | -5.18309300 | 0.10807800  | -0.48806400 |
| C | -6.33891400 | 0.15166100  | -1.27576500 |
| C | -5.16151400 | 0.82767600  | 0.70751300  |
| C | -7.46547800 | 0.84490500  | -0.84844800 |
| H | -6.34611800 | -0.34184900 | -2.24409800 |
| C | -6.28798900 | 1.52991100  | 1.13084900  |
| H | -4.26088400 | 0.85579000  | 1.31373200  |
| C | -7.44754900 | 1.53204000  | 0.36388500  |
| H | -8.35379400 | 0.86059000  | -1.47245700 |
| H | -6.24362800 | 2.07986600  | 2.06638900  |
| H | -8.32550600 | 2.07713600  | 0.69642700  |
| C | 1.87746000  | 1.74785600  | 4.64936400  |
| C | 3.00054400  | 1.02587500  | 5.07281200  |
| C | 2.91202900  | 0.20169700  | 6.21237700  |
| C | 1.69310000  | 0.13630000  | 6.84983200  |
| C | 0.56353200  | 0.87158800  | 6.39311000  |
| C | 0.63084700  | 1.69613400  | 5.29190800  |
| H | 3.77365700  | -0.35715200 | 6.56253900  |
| H | 1.58275100  | -0.49131000 | 7.72858300  |
| H | -0.37235100 | 0.78145900  | 6.93611700  |
| H | -0.21182500 | 2.27185700  | 4.92391700  |
| N | 4.03244400  | 1.28100500  | 4.20799300  |

|   |             |             |             |
|---|-------------|-------------|-------------|
| N | 3. 59233100 | 2. 10187000 | 3. 29329900 |
| N | 2. 31912200 | 2. 40720500 | 3. 54874900 |
| O | 1. 58247500 | 3. 10933800 | 2. 70360100 |
| H | 1. 19676500 | 2. 13240700 | 1. 93808800 |

### TS5(SS)

NImag=1 (-955.3066)

|                                              |              |
|----------------------------------------------|--------------|
| Sum of electronic and zero-point Energies=   | -3189.582582 |
| Sum of electronic and thermal Energies=      | -3189.521933 |
| Sum of electronic and thermal Enthalpies=    | -3189.520989 |
| Sum of electronic and thermal Free Energies= | -3189.681202 |

|   |              |              |              |
|---|--------------|--------------|--------------|
| C | 2. 09298700  | 0. 04632300  | -0. 37649800 |
| O | 1. 96728300  | -1. 07008100 | -0. 88383900 |
| C | 1. 16755000  | 0. 75802500  | 0. 45904400  |
| C | -0. 17258500 | 0. 06958800  | 0. 66090100  |
| H | 1. 13578800  | 1. 82817200  | 0. 24671400  |
| H | 0. 01804200  | -1. 01300300 | 0. 65469300  |
| H | 0. 07139900  | -0. 70825500 | -1. 67058500 |
| C | -0. 83247700 | 0. 40043400  | 1. 98989700  |
| C | -0. 61180200 | 1. 62189200  | 2. 63304500  |
| C | -1. 66995600 | -0. 53728900 | 2. 60296600  |
| C | -1. 20378200 | 1. 89707400  | 3. 86202000  |
| H | 0. 04661800  | 2. 36070200  | 2. 18453500  |
| C | -2. 25917800 | -0. 26501000 | 3. 83533800  |
| H | -1. 84068300 | -1. 49866600 | 2. 12481900  |

|   |             |             |             |
|---|-------------|-------------|-------------|
| C | -2.02837000 | 0.95239600  | 4.46940200  |
| H | -1.01144000 | 2.84784400  | 4.35000400  |
| H | -2.89220700 | -1.01424000 | 4.29918200  |
| H | -2.48193500 | 1.16285600  | 5.43355500  |
| C | 5.60139600  | -3.20465500 | -4.56415800 |
| C | 6.43272600  | -3.42716800 | -3.46814400 |
| C | 6.11002800  | -2.84013000 | -2.24808300 |
| C | 4.12574300  | -1.83114900 | -3.22306700 |
| C | 4.45571500  | -2.41481700 | -4.44387600 |
| H | 5.84577500  | -3.65194000 | -5.52277000 |
| H | 7.32099500  | -4.04479300 | -3.56680800 |
| H | 3.22701400  | -1.23174000 | -3.10652000 |
| H | 3.81602000  | -2.25926000 | -5.30678300 |
| C | 4.96863500  | -2.04920100 | -2.13900300 |
| C | 4.82183400  | -1.51893000 | -0.73118800 |
| C | 6.19200300  | -1.84050100 | -0.03677300 |
| H | 4.00409200  | -1.98677200 | -0.18378300 |
| C | 6.82518000  | -2.93868700 | -0.92247700 |
| H | 6.00120700  | -2.17058600 | 0.98434200  |
| H | 7.90691400  | -2.78651900 | -0.99158400 |
| H | 6.66247400  | -3.92371400 | -0.47044900 |
| N | 4.58334400  | -0.07142900 | -0.74020600 |
| O | 7.05486600  | -0.71587100 | 0.09728700  |
| C | 5.61519600  | 0.80237600  | -0.90438000 |
| C | 6.99257400  | 0.22646900  | -0.94883800 |



|   |            |             |             |
|---|------------|-------------|-------------|
| H | 7.19591000 | -0.22497900 | -1.93045500 |
| H | 7.73033500 | 1.00349600  | -0.74738500 |
| N | 5.20434400 | 2.03762800  | -0.86157800 |
| C | 3.47151200 | 0.65609400  | -0.56501100 |
| N | 3.86175100 | 1.92914500  | -0.65252000 |
| C | 3.06442600 | 3.12652500  | -0.60179000 |
| C | 2.20006400 | 3.40273300  | -1.66187400 |
| C | 3.21854200 | 3.95864600  | 0.51415400  |
| C | 1.46571200 | 4.58898200  | -1.58564900 |
| C | 2.44934700 | 5.11817500  | 0.54169600  |
| C | 1.57412900 | 5.45087300  | -0.49654300 |
| H | 0.77627700 | 4.82725500  | -2.39237200 |
| H | 2.53633700 | 5.78085300  | 1.39957800  |
| C | 1.99342700 | 2.44370100  | -2.80469400 |
| H | 2.92079500 | 1.93533300  | -3.08752300 |
| H | 1.24603900 | 1.68253800  | -2.53762700 |
| H | 1.61912100 | 2.97682400  | -3.68143100 |
| C | 4.15872100 | 3.60001400  | 1.63328400  |
| H | 4.05852800 | 4.31655700  | 2.45112100  |
| H | 3.93950200 | 2.59890400  | 2.02416800  |
| H | 5.19646900 | 3.61466600  | 1.28622800  |
| C | 0.76551400 | 6.72087700  | -0.42732300 |
| H | 1.41834700 | 7.59975100  | -0.42971200 |
| H | 0.08310300 | 6.80441800  | -1.27677300 |
| H | 0.17351700 | 6.75657900  | 0.49277600  |

|   |             |             |             |
|---|-------------|-------------|-------------|
| C | -3.25482500 | 1.35703900  | -0.56561400 |
| C | -1.87342800 | 1.60539200  | -0.54859700 |
| C | -1.38552700 | 2.89711800  | -0.49936100 |
| C | -2.28047800 | 3.96607200  | -0.42646400 |
| C | -3.64606900 | 3.71330300  | -0.38499200 |
| C | -4.15532600 | 2.41308900  | -0.45221600 |
| C | -2.28971700 | -0.71526600 | -0.47779300 |
| C | -1.13161100 | 0.29916800  | -0.53647400 |
| H | -0.31694000 | 3.08254200  | -0.51297900 |
| H | -1.90803000 | 4.98521600  | -0.38557300 |
| H | -4.34654100 | 4.53876100  | -0.30281000 |
| H | -5.22538100 | 2.25896000  | -0.42529500 |
| O | -0.46498100 | 0.10107100  | -1.77343900 |
| O | -2.15268000 | -1.91047200 | -0.33431900 |
| N | -3.48211600 | -0.04313300 | -0.68559400 |
| C | -4.76196000 | -0.78878300 | -0.69067600 |
| C | -5.01405000 | -1.19864500 | 0.77032500  |
| C | -5.44027100 | -0.23379600 | 1.69141100  |
| C | -4.70213300 | -2.47597400 | 1.24102100  |
| C | -5.62343100 | -0.55614700 | 3.03104500  |
| H | -5.63807800 | 0.78067100  | 1.35770200  |
| C | -4.88195700 | -2.79897900 | 2.58522700  |
| H | -4.30504500 | -3.21705400 | 0.55708000  |
| C | -5.36275100 | -1.84887300 | 3.47984200  |
| H | -5.96333000 | 0.20648400  | 3.72497700  |

|   |             |             |             |
|---|-------------|-------------|-------------|
| H | -4.64268500 | -3.80080400 | 2.92861600  |
| H | -5.51300900 | -2.10596100 | 4.52445700  |
| C | -4.69303800 | -1.98001000 | -1.67271400 |
| C | -3.77749400 | -2.03272400 | -2.72443900 |
| C | -5.69648500 | -2.95015700 | -1.61059200 |
| C | -3.84593900 | -3.05241500 | -3.66941400 |
| H | -2.99586000 | -1.28387900 | -2.81032800 |
| C | -5.76139100 | -3.97217500 | -2.55129900 |
| H | -6.44054100 | -2.90174900 | -0.82011000 |
| C | -4.83225800 | -4.02990700 | -3.58582500 |
| H | -3.11670500 | -3.08135700 | -4.47320900 |
| H | -6.54578300 | -4.71917700 | -2.47725500 |
| H | -4.87982300 | -4.82581600 | -4.32242600 |
| C | -5.88244100 | 0.06469900  | -1.31449600 |
| C | -7.17619000 | 0.09383600  | -0.79720200 |
| C | -5.62595700 | 0.73055900  | -2.51934600 |
| C | -8.18198700 | 0.81277500  | -1.44561100 |
| H | -7.40967100 | -0.44257700 | 0.11610300  |
| C | -6.62325400 | 1.45162200  | -3.15962100 |
| H | -4.62870200 | 0.68903400  | -2.94907400 |
| C | -7.90895900 | 1.50162300  | -2.62023100 |
| H | -9.18213300 | 0.82778200  | -1.02339300 |
| H | -6.39845500 | 1.97313900  | -4.08476500 |
| H | -8.69088100 | 2.06445100  | -3.12038800 |
| C | 2.24291300  | -1.29217600 | 3.49976000  |

|   |             |             |            |
|---|-------------|-------------|------------|
| C | 2.92493500  | -2.47628400 | 3.18382800 |
| C | 2.51716400  | -3.69299600 | 3.76847500 |
| C | 1.44005500  | -3.64925600 | 4.62449500 |
| C | 0.75627100  | -2.43522400 | 4.91636100 |
| C | 1.14081800  | -1.23356900 | 4.36723600 |
| H | 3.03407000  | -4.61887300 | 3.53991400 |
| H | 1.09142700  | -4.56578000 | 5.09025700 |
| H | -0.09837100 | -2.46270600 | 5.58540500 |
| H | 0.62670100  | -0.29762200 | 4.56264700 |
| N | 3.91532200  | -2.18166500 | 2.28781600 |
| N | 3.86909500  | -0.89498600 | 2.05325100 |
| N | 2.89625100  | -0.34948000 | 2.77458600 |
| O | 2.57366500  | 0.93070800  | 2.65971100 |
| H | 1.82000100  | 0.86902400  | 1.58723500 |

### IM5(RR)

NImag=0

|                                              |              |
|----------------------------------------------|--------------|
| Sum of electronic and zero-point Energies=   | -3189.603735 |
| Sum of electronic and thermal Energies=      | -3189.543418 |
| Sum of electronic and thermal Enthalpies=    | -3189.542474 |
| Sum of electronic and thermal Free Energies= | -3189.701602 |

|   |             |             |             |
|---|-------------|-------------|-------------|
| C | -2.01120400 | -0.35867000 | -0.51001300 |
| O | -2.06970700 | 0.58903100  | -1.41503400 |
| C | -2.17943100 | -1.81028900 | -1.02503700 |
| C | -0.73826200 | -2.18023100 | -1.36724400 |

|   |             |             |             |
|---|-------------|-------------|-------------|
| H | -2.58260900 | -2.46350400 | -0.24231400 |
| H | -0.46209500 | -1.60150100 | -2.25781400 |
| H | -0.88591400 | 1.41493500  | -1.25847500 |
| C | -0.36955100 | -3.62722300 | -1.57909800 |
| C | -1.16212500 | -4.69026400 | -1.14654200 |
| C | 0.85640400  | -3.91093200 | -2.19220300 |
| C | -0.73702900 | -6.00664500 | -1.31425500 |
| H | -2.12657800 | -4.49952800 | -0.68316100 |
| C | 1.28566100  | -5.22345900 | -2.35476200 |
| H | 1.46686900  | -3.08649300 | -2.55739200 |
| C | 0.48870700  | -6.27782700 | -1.91318000 |
| H | -1.36894100 | -6.82276900 | -0.97658400 |
| H | 2.23879200  | -5.42364600 | -2.83515000 |
| H | 0.81871200  | -7.30392400 | -2.04275400 |
| C | -1.15257100 | 5.36177000  | 2.35872200  |
| C | -0.93436500 | 4.61648100  | 3.51868300  |
| C | -1.11685300 | 3.23818000  | 3.47282000  |
| C | -1.74472100 | 3.36555800  | 1.12300400  |
| C | -1.55781200 | 4.74596900  | 1.17196300  |
| H | -1.00824700 | 6.43783300  | 2.38039200  |
| H | -0.63080500 | 5.10638200  | 4.44031900  |
| H | -2.02821100 | 2.87962100  | 0.19336700  |
| H | -1.71191300 | 5.32731000  | 0.26858300  |
| C | -1.50238000 | 2.63450200  | 2.27837200  |
| C | -1.53865400 | 1.13429100  | 2.44130300  |

|   |             |             |             |
|---|-------------|-------------|-------------|
| C | -1.55176900 | 0.91489000  | 3.98829200  |
| H | -0.67047300 | 0.66023600  | 1.98341700  |
| C | -0.92090800 | 2.20461600  | 4.55680800  |
| H | -0.98145600 | 0.02346400  | 4.25478600  |
| H | -1.39069200 | 2.46321800  | 5.51106800  |
| H | 0.14743900  | 2.03832600  | 4.74242500  |
| N | -2.74594900 | 0.56330700  | 1.83030200  |
| O | -2.85280100 | 0.67151600  | 4.51607800  |
| C | -3.95126200 | 0.74117200  | 2.45747300  |
| C | -3.92002500 | 1.30624100  | 3.84060700  |
| H | -3.80005500 | 2.39763700  | 3.81024600  |
| H | -4.84140000 | 1.05767500  | 4.36837600  |
| N | -4.93317200 | 0.27624200  | 1.74604700  |
| C | -2.99269200 | -0.03787800 | 0.65234700  |
| N | -4.31816600 | -0.19155400 | 0.61773000  |
| C | -5.09270200 | -0.80122900 | -0.42933400 |
| C | -5.43234100 | -0.03193300 | -1.54449800 |
| C | -5.47946300 | -2.13287100 | -0.25961900 |
| C | -6.14624600 | -0.67818500 | -2.55415800 |
| C | -6.19016500 | -2.72758100 | -1.29812000 |
| C | -6.51690800 | -2.01929300 | -2.45664600 |
| H | -6.42255900 | -0.11091400 | -3.43964500 |
| H | -6.49981700 | -3.76536300 | -1.19936200 |
| C | -5.06032100 | 1.42179300  | -1.64025600 |
| H | -5.33957600 | 1.95476200  | -0.72466600 |

|   |             |             |             |
|---|-------------|-------------|-------------|
| H | -3.97812200 | 1.52268300  | -1.77810200 |
| H | -5.57622800 | 1.89201600  | -2.47986500 |
| C | -5.16976000 | -2.87772900 | 1.01262100  |
| H | -5.39763500 | -3.94017800 | 0.90231800  |
| H | -4.11584300 | -2.78186700 | 1.29832500  |
| H | -5.76164400 | -2.48219000 | 1.84487400  |
| C | -7.24874400 | -2.69428000 | -3.58790400 |
| H | -6.53969900 | -3.08043500 | -4.32835100 |
| H | -7.84593000 | -3.53677600 | -3.22956800 |
| H | -7.91335700 | -1.99498900 | -4.10209300 |
| C | 1.77094400  | -2.00313200 | 1.31300200  |
| C | 0.43023000  | -2.27849100 | 1.02234600  |
| C | -0.36706400 | -2.97288200 | 1.91521800  |
| C | 0.18331000  | -3.40940600 | 3.12078200  |
| C | 1.50978500  | -3.11057300 | 3.41791400  |
| C | 2.32021900  | -2.40257300 | 2.52793200  |
| C | 1.40475400  | -0.96969300 | -0.70163900 |
| C | 0.04865000  | -1.52393800 | -0.21744600 |
| H | -1.41018200 | -3.17140900 | 1.68083700  |
| H | -0.42154500 | -3.96782300 | 3.82764700  |
| H | 1.93402400  | -3.43332400 | 4.36379500  |
| H | 3.34557800  | -2.18161900 | 2.79052500  |
| O | -0.72845100 | -0.40292300 | 0.17979500  |
| O | 1.53135400  | -0.34074600 | -1.72388200 |
| N | 2.38349700  | -1.29242100 | 0.23782500  |

|   |            |             |             |
|---|------------|-------------|-------------|
| C | 3.63114500 | -0.49937100 | 0.42148600  |
| C | 3.23641700 | 0.62585300  | 1.39830700  |
| C | 3.65965800 | 0.70240500  | 2.72392600  |
| C | 2.29249600 | 1.55831800  | 0.93893800  |
| C | 3.18240800 | 1.71277900  | 3.56288200  |
| H | 4.36636700 | -0.02019200 | 3.11852100  |
| C | 1.81522500 | 2.56196900  | 1.77197200  |
| H | 1.92293000 | 1.51049100  | -0.08230300 |
| C | 2.27058400 | 2.64872100  | 3.08944600  |
| H | 3.53433300 | 1.76215100  | 4.58930900  |
| H | 1.09274900 | 3.27542800  | 1.38400300  |
| H | 1.91080000 | 3.44567300  | 3.73540900  |
| C | 4.15314200 | 0.04095800  | -0.92845700 |
| C | 4.28914200 | -0.83922900 | -2.00765900 |
| C | 4.63575200 | 1.33973600  | -1.05719300 |
| C | 4.85818200 | -0.41913000 | -3.19866100 |
| H | 3.92886200 | -1.86042900 | -1.90985800 |
| C | 5.21918100 | 1.76208200  | -2.25430900 |
| H | 4.55279800 | 2.03895300  | -0.23204900 |
| C | 5.33008700 | 0.88916500  | -3.32706400 |
| H | 4.93791300 | -1.11216100 | -4.03052300 |
| H | 5.57591800 | 2.78379600  | -2.34122700 |
| H | 5.78199700 | 1.21876500  | -4.25809900 |
| C | 4.78348700 | -1.40877900 | 0.87785700  |
| C | 5.96272900 | -0.83336200 | 1.36148300  |



|   |             |             |             |
|---|-------------|-------------|-------------|
| C | 4.74992900  | -2.78936100 | 0.67065900  |
| C | 7.06067200  | -1.62436500 | 1.68197000  |
| H | 6.02675800  | 0.24590600  | 1.47056100  |
| C | 5.85151700  | -3.58102600 | 0.98655200  |
| H | 3.85461300  | -3.25224200 | 0.26536900  |
| C | 7.00749200  | -3.00428500 | 1.50200100  |
| H | 7.96414400  | -1.15800900 | 2.06277700  |
| H | 5.80094800  | -4.65365700 | 0.82613700  |
| H | 7.86478200  | -3.62178800 | 1.75114300  |
| C | 0.77494100  | 3.23294300  | -2.97105500 |
| C | 0.30723300  | 4.40348200  | -3.58560100 |
| C | 1.00650100  | 4.94975700  | -4.67783400 |
| C | 2.14396400  | 4.29072700  | -5.08963800 |
| C | 2.59717100  | 3.10632100  | -4.44744400 |
| C | 1.92980700  | 2.54574300  | -3.37989600 |
| H | 0.65353300  | 5.85409000  | -5.16241400 |
| H | 2.71433900  | 4.67898100  | -5.92802400 |
| H | 3.49956900  | 2.62478200  | -4.81246700 |
| H | 2.25685000  | 1.63400500  | -2.88772500 |
| N | -0.82986100 | 4.82006300  | -2.93825700 |
| N | -1.06679500 | 3.98527400  | -1.97477500 |
| N | -0.13192400 | 3.03597900  | -1.98459300 |
| O | -0.09417100 | 2.07432800  | -1.04465100 |
| H | -2.84649000 | -1.83212000 | -1.88847000 |

**IM5(RS)**

NImag=0

|                                              |              |
|----------------------------------------------|--------------|
| Sum of electronic and zero-point Energies=   | -3189.607553 |
| Sum of electronic and thermal Energies=      | -3189.547162 |
| Sum of electronic and thermal Enthalpies=    | -3189.546218 |
| Sum of electronic and thermal Free Energies= | -3189.703774 |

|   |             |             |             |
|---|-------------|-------------|-------------|
| C | -2.03034900 | 2.42471900  | 0.72289600  |
| O | -2.76270900 | 2.75849200  | 1.62868100  |
| C | -0.61807000 | 2.92248000  | 0.55733100  |
| C | 0.26042700  | 2.36588400  | 1.70195100  |
| H | -0.20381500 | 2.63998900  | -0.41173600 |
| H | -0.30657600 | 2.50470500  | 2.63251000  |
| H | -1.00180500 | -0.41458300 | 0.70058900  |
| C | 1.57877600  | 3.09426600  | 1.84972700  |
| C | 2.33672600  | 3.49023400  | 0.74369700  |
| C | 2.05303900  | 3.39164600  | 3.13046400  |
| C | 3.52688900  | 4.18982300  | 0.92240300  |
| H | 2.00134500  | 3.25074200  | -0.26217100 |
| C | 3.25258900  | 4.07193500  | 3.30909700  |
| H | 1.47271000  | 3.08300300  | 3.99629300  |
| C | 3.99119800  | 4.47890800  | 2.20165500  |
| H | 4.09952100  | 4.49823700  | 0.05441200  |
| H | 3.60486700  | 4.29000100  | 4.31283200  |
| H | 4.92550400  | 5.01655200  | 2.33414300  |
| C | -7.91529500 | 0.59218300  | 2.52857800  |

|   |             |             |             |
|---|-------------|-------------|-------------|
| C | -7.30150300 | -0.65758100 | 2.60103200  |
| C | -5.98225400 | -0.78403500 | 2.17904100  |
| C | -5.89578400 | 1.58389800  | 1.63397000  |
| C | -7.22002300 | 1.70448400  | 2.05103700  |
| H | -8.94750000 | 0.70190600  | 2.84708200  |
| H | -7.84816800 | -1.51963600 | 2.97291100  |
| H | -5.33477100 | 2.44331000  | 1.27683100  |
| H | -7.71404800 | 2.67001600  | 2.00612400  |
| C | -5.29865200 | 0.33160300  | 1.69853700  |
| C | -3.89225800 | -0.05440900 | 1.29968400  |
| C | -3.93691700 | -1.61611300 | 1.21054300  |
| H | -3.13815300 | 0.25974600  | 2.02585100  |
| C | -5.08517500 | -1.99978300 | 2.16608300  |
| H | -2.97417200 | -2.04184900 | 1.50166200  |
| H | -5.57284500 | -2.91384200 | 1.81724200  |
| H | -4.68985700 | -2.19521600 | 3.17043100  |
| N | -3.50970800 | 0.51925100  | 0.01280400  |
| O | -4.18843700 | -2.12679000 | -0.09409800 |
| C | -3.90275400 | -0.05374000 | -1.15817000 |
| C | -4.76348600 | -1.26957400 | -1.05197700 |
| H | -5.79084300 | -0.98101700 | -0.78623900 |
| H | -4.77544200 | -1.80799400 | -2.00040100 |
| N | -3.36149400 | 0.54044400  | -2.18472500 |
| C | -2.64404000 | 1.48835800  | -0.29685700 |
| N | -2.57589600 | 1.50285700  | -1.62436900 |

|   |             |             |             |
|---|-------------|-------------|-------------|
| C | -1.81934400 | 2.42587200  | -2.42523900 |
| C | -2.16732800 | 3.78060600  | -2.38053200 |
| C | -0.74483600 | 1.92410400  | -3.16489000 |
| C | -1.35677000 | 4.66735300  | -3.08440500 |
| C | 0.03306200  | 2.86173800  | -3.84419500 |
| C | -0.24902100 | 4.22668000  | -3.81065400 |
| H | -1.59878800 | 5.72762200  | -3.06662700 |
| H | 0.89133100  | 2.50678800  | -4.40983800 |
| C | -3.36797500 | 4.27991100  | -1.61343300 |
| H | -4.20501400 | 3.57673400  | -1.67193300 |
| H | -3.14682500 | 4.44655900  | -0.55273900 |
| H | -3.70217700 | 5.23414600  | -2.02682500 |
| C | -0.44065600 | 0.45510500  | -3.24637000 |
| H | 0.61099900  | 0.30385600  | -3.49793800 |
| H | -0.63594100 | -0.06557100 | -2.30358800 |
| H | -1.05664300 | -0.01061400 | -4.02526200 |
| C | 0.60215900  | 5.20662300  | -4.57626200 |
| H | 0.66544100  | 6.16743000  | -4.05837500 |
| H | 1.61581500  | 4.82296600  | -4.71624100 |
| H | 0.17776400  | 5.39277100  | -5.56906800 |
| C | 2.24189000  | -0.49654400 | 2.19063000  |
| C | 1.12369000  | 0.18653600  | 2.67460400  |
| C | 0.82202700  | 0.22668000  | 4.02190100  |
| C | 1.68235800  | -0.39608700 | 4.92631500  |
| C | 2.82224000  | -1.03450800 | 4.45123300  |

|   |             |             |             |
|---|-------------|-------------|-------------|
| C | 3.12100200  | -1.09956100 | 3.08766700  |
| C | 1.29588700  | 0.46361700  | 0.33204900  |
| C | 0.38688700  | 0.83252800  | 1.53563500  |
| H | -0.07384700 | 0.74172100  | 4.36115600  |
| H | 1.46816000  | -0.37864000 | 5.98988300  |
| H | 3.50367300  | -1.50941600 | 5.15045200  |
| H | 4.00825900  | -1.62742700 | 2.76802400  |
| O | -0.92505500 | 0.35989800  | 1.38664700  |
| O | 1.17844800  | 0.89975700  | -0.79815400 |
| N | 2.26475300  | -0.41963800 | 0.76247400  |
| C | 3.37219800  | -0.87064000 | -0.12321000 |
| C | 4.35699300  | 0.30682100  | -0.20506400 |
| C | 5.26461700  | 0.55601900  | 0.82937900  |
| C | 4.29469800  | 1.21712600  | -1.26592800 |
| C | 6.13622700  | 1.64001200  | 0.77081200  |
| H | 5.30541000  | -0.11084600 | 1.68442700  |
| C | 5.17698200  | 2.29142300  | -1.33284300 |
| H | 3.55470900  | 1.07498300  | -2.04604800 |
| C | 6.11214300  | 2.49882100  | -0.32324600 |
| H | 6.84016100  | 1.80555400  | 1.58069300  |
| H | 5.12729700  | 2.97186700  | -2.17854200 |
| H | 6.80358900  | 3.33491900  | -0.37844000 |
| C | 2.87700200  | -1.33579200 | -1.51014500 |
| C | 1.58678100  | -1.81864200 | -1.70980100 |
| C | 3.81246200  | -1.47690400 | -2.54000600 |

|   |              |              |              |
|---|--------------|--------------|--------------|
| C | 1. 23100100  | -2. 41283300 | -2. 91810800 |
| H | 0. 84434500  | -1. 71572300 | -0. 92911900 |
| C | 3. 45461600  | -2. 05609900 | -3. 75271500 |
| H | 4. 83522800  | -1. 14238500 | -2. 39027800 |
| C | 2. 15963800  | -2. 52873900 | -3. 94745900 |
| H | 0. 21747700  | -2. 78146000 | -3. 04940900 |
| H | 4. 19742000  | -2. 15135900 | -4. 53925300 |
| H | 1. 87992200  | -2. 99211900 | -4. 88882400 |
| C | 3. 95300300  | -2. 18774200 | 0. 42842400  |
| C | 5. 31398500  | -2. 48268800 | 0. 38827100  |
| C | 3. 05591600  | -3. 17370000 | 0. 85792700  |
| C | 5. 77649000  | -3. 72813000 | 0. 81743400  |
| H | 6. 02330200  | -1. 74830600 | 0. 02027700  |
| C | 3. 51779300  | -4. 41039000 | 1. 28449300  |
| H | 1. 98679100  | -2. 97351200 | 0. 86960300  |
| C | 4. 88446200  | -4. 69087700 | 1. 27446800  |
| H | 6. 84119600  | -3. 94010800 | 0. 78744000  |
| H | 2. 79821400  | -5. 15164200 | 1. 61822400  |
| H | 5. 24823800  | -5. 65714300 | 1. 61053500  |
| C | -1. 59256000 | -3. 50367700 | -1. 11197400 |
| C | -1. 08393200 | -4. 65693100 | -0. 49200100 |
| C | -1. 28563400 | -5. 91380100 | -1. 10051100 |
| C | -1. 97232800 | -5. 94095900 | -2. 29349600 |
| C | -2. 46532900 | -4. 75388400 | -2. 90748800 |
| C | -2. 28879600 | -3. 51640300 | -2. 33141600 |

|   |             |             |             |
|---|-------------|-------------|-------------|
| H | -0.90201500 | -6.81802600 | -0.63944800 |
| H | -2.14136500 | -6.89064700 | -2.79148900 |
| H | -2.98738700 | -4.83559000 | -3.85621200 |
| H | -2.62814800 | -2.59093500 | -2.78802200 |
| N | -0.44151800 | -4.29062200 | 0.65457500  |
| N | -0.53234600 | -2.98685400 | 0.75486600  |
| N | -1.21444600 | -2.50932600 | -0.28105200 |
| O | -1.40308400 | -1.21031700 | -0.46247300 |
| H | -0.65196300 | 4.01499500  | 0.63415600  |

### IM5(SR)

NImag=0

|                                              |              |
|----------------------------------------------|--------------|
| Sum of electronic and zero-point Energies=   | -3189.586326 |
| Sum of electronic and thermal Energies=      | -3189.525779 |
| Sum of electronic and thermal Enthalpies=    | -3189.524835 |
| Sum of electronic and thermal Free Energies= | -3189.683397 |

|   |             |             |             |
|---|-------------|-------------|-------------|
| C | 1.88413700  | 0.54816800  | -0.53711000 |
| O | 2.02691000  | 1.48062900  | -1.30305200 |
| C | 0.77929100  | -0.45624300 | -0.57755500 |
| C | -0.32045300 | -0.07708000 | -1.57168300 |
| H | 0.36246300  | -0.58182600 | 0.42602600  |
| H | 0.15887000  | 0.32162600  | -2.47522900 |
| H | 0.20720600  | 2.38646700  | -1.01396600 |
| C | -1.16100200 | -1.27496400 | -1.98261800 |
| C | -1.42676000 | -2.31731300 | -1.08957000 |

|   |             |             |             |
|---|-------------|-------------|-------------|
| C | -1.70095200 | -1.34377200 | -3.27024800 |
| C | -2.20658300 | -3.40387600 | -1.47937800 |
| H | -1.01931900 | -2.28916100 | -0.08142700 |
| C | -2.47920400 | -2.43035400 | -3.66225100 |
| H | -1.50030900 | -0.54112100 | -3.97560400 |
| C | -2.73383400 | -3.46574200 | -2.76621900 |
| H | -2.39481400 | -4.20803600 | -0.77368400 |
| H | -2.87824000 | -2.46985400 | -4.67155400 |
| H | -3.33262700 | -4.31926700 | -3.06978200 |
| C | 4.56546700  | 6.10702700  | 0.38383800  |
| C | 5.75067300  | 5.46462400  | 0.03426100  |
| C | 5.72253400  | 4.10041600  | -0.24144000 |
| C | 3.33200900  | 4.03443300  | 0.17678100  |
| C | 3.36471000  | 5.39764900  | 0.45828500  |
| H | 4.57551700  | 7.16916400  | 0.60873300  |
| H | 6.68457100  | 6.01797000  | -0.01169100 |
| H | 2.40175900  | 3.47559100  | 0.23671100  |
| H | 2.45117000  | 5.91223800  | 0.73880400  |
| C | 4.51958000  | 3.40116000  | -0.17675300 |
| C | 4.73255500  | 1.93858300  | -0.50243600 |
| C | 6.29458500  | 1.75368100  | -0.51586800 |
| H | 4.31443000  | 1.64027400  | -1.46357800 |
| C | 6.86126200  | 3.18974800  | -0.62601100 |
| H | 6.55821000  | 1.12125000  | -1.36072100 |
| H | 7.73949400  | 3.29481100  | 0.01947100  |



|   |             |             |             |
|---|-------------|-------------|-------------|
| H | 7.18973100  | 3.38913600  | -1.65256000 |
| N | 4.10577500  | 1.09115100  | 0.51623800  |
| O | 6.82035000  | 1.06476400  | 0.60720400  |
| C | 4.76272700  | 0.78412200  | 1.66588400  |
| C | 6.15448900  | 1.29909000  | 1.82544300  |
| H | 6.14002300  | 2.36715600  | 2.09052100  |
| H | 6.67182100  | 0.74104800  | 2.60620400  |
| N | 4.05914100  | -0.01352700 | 2.41844400  |
| C | 2.93529800  | 0.43580000  | 0.54601200  |
| N | 2.91669800  | -0.21826100 | 1.70738800  |
| C | 1.89697700  | -1.06576300 | 2.27880700  |
| C | 0.80787800  | -0.45048100 | 2.90427200  |
| C | 2.07590400  | -2.44807200 | 2.20410200  |
| C | -0.13470000 | -1.28551300 | 3.49936600  |
| C | 1.11819500  | -3.23184300 | 2.84620400  |
| C | 0.02580000  | -2.67292100 | 3.50773000  |
| H | -1.01276900 | -0.84212900 | 3.96211900  |
| H | 1.23530200  | -4.31334000 | 2.82401400  |
| C | 0.64304100  | 1.04592500  | 2.88831400  |
| H | 1.56814700  | 1.55346300  | 3.18419100  |
| H | 0.34619900  | 1.39745600  | 1.89149000  |
| H | -0.15052100 | 1.34338800  | 3.57648800  |
| C | 3.18446400  | -3.09349700 | 1.41872200  |
| H | 3.56434300  | -3.97238400 | 1.94627400  |
| H | 2.78415900  | -3.41698400 | 0.44801500  |

|   |             |             |             |
|---|-------------|-------------|-------------|
| H | 4.02492100  | -2.41926600 | 1.23061100  |
| C | -0.93709900 | -3.56071300 | 4.25201300  |
| H | -1.83111400 | -3.00979100 | 4.54976100  |
| H | -1.24240400 | -4.41670900 | 3.64178300  |
| H | -0.46452800 | -3.95863200 | 5.15690400  |
| C | -3.46651100 | 1.30446800  | -1.68217100 |
| C | -2.15656700 | 1.60518600  | -2.05363300 |
| C | -1.87769300 | 2.28462600  | -3.22499500 |
| C | -2.93842800 | 2.68037800  | -4.04195600 |
| C | -4.24496100 | 2.38129700  | -3.66673300 |
| C | -4.53237300 | 1.69123400  | -2.48672300 |
| C | -2.18883100 | 0.56218200  | 0.07147500  |
| C | -1.21505300 | 1.07338200  | -1.01224400 |
| H | -0.84903000 | 2.50795100  | -3.50108600 |
| H | -2.74597600 | 3.21870800  | -4.96398900 |
| H | -5.06957000 | 2.68858500  | -4.30238300 |
| H | -5.55730100 | 1.46755800  | -2.22302100 |
| O | -0.45675600 | 2.08265100  | -0.37386100 |
| O | -1.84358300 | 0.23319200  | 1.18548600  |
| N | -3.47682600 | 0.59971800  | -0.44452800 |
| C | -4.73556000 | 0.38578600  | 0.31315400  |
| C | -5.25876000 | 1.79718500  | 0.64596100  |
| C | -6.46216300 | 2.32720400  | 0.18554500  |
| C | -4.41887700 | 2.61655800  | 1.41402100  |
| C | -6.83133000 | 3.63584900  | 0.50197000  |

|   |             |             |             |
|---|-------------|-------------|-------------|
| H | -7.12327300 | 1.73102000  | -0.43407000 |
| C | -4.78631000 | 3.91684800  | 1.73129600  |
| H | -3.47171700 | 2.21877000  | 1.77234600  |
| C | -6.00049700 | 4.43251500  | 1.27795200  |
| H | -7.77258700 | 4.02809500  | 0.12916800  |
| H | -4.12274500 | 4.53122500  | 2.33205800  |
| H | -6.28872100 | 5.44988300  | 1.52398400  |
| C | -4.50535600 | -0.45895700 | 1.58624800  |
| C | -3.91741200 | -1.72188400 | 1.45016900  |
| C | -5.01002700 | -0.08278100 | 2.82654400  |
| C | -3.81113000 | -2.57359100 | 2.53589400  |
| H | -3.54819300 | -2.03234800 | 0.47631800  |
| C | -4.91291300 | -0.94650100 | 3.92086900  |
| H | -5.49027000 | 0.88083200  | 2.95490500  |
| C | -4.31560200 | -2.19041900 | 3.78189500  |
| H | -3.34677100 | -3.54780400 | 2.41058900  |
| H | -5.31824400 | -0.63778500 | 4.87981600  |
| H | -4.25458100 | -2.86723800 | 4.62958500  |
| C | -5.69138700 | -0.49442500 | -0.51445600 |
| C | -7.00181400 | -0.69263500 | -0.06516000 |
| C | -5.24362400 | -1.22750600 | -1.61396100 |
| C | -7.86286400 | -1.55040300 | -0.73902200 |
| H | -7.34084600 | -0.18775000 | 0.83584000  |
| C | -6.10455100 | -2.09459100 | -2.28349500 |
| H | -4.21527100 | -1.13768400 | -1.95138500 |

|   |             |             |             |
|---|-------------|-------------|-------------|
| C | -7.41938900 | -2.24977600 | -1.85998700 |
| H | -8.87768000 | -1.68395000 | -0.37691600 |
| H | -5.73089200 | -2.65096000 | -3.13840100 |
| H | -8.08996800 | -2.92272100 | -2.38557500 |
| C | 4.73536200  | -3.14986700 | -1.56288900 |
| C | 5.71470200  | -2.18109800 | -1.28319900 |
| C | 7.06699600  | -2.57343300 | -1.16216500 |
| C | 7.35448800  | -3.90851200 | -1.32364900 |
| C | 6.34196000  | -4.87431800 | -1.60027500 |
| C | 5.01978400  | -4.51521400 | -1.72247000 |
| H | 7.83571500  | -1.83949600 | -0.93977500 |
| H | 8.38237600  | -4.24794600 | -1.23523300 |
| H | 6.63004500  | -5.91481300 | -1.71410900 |
| H | 4.22541000  | -5.22391600 | -1.92967700 |
| N | 5.10895600  | -0.97611400 | -1.15220000 |
| N | 3.80917500  | -1.17416900 | -1.34919400 |
| N | 3.56397500  | -2.45248500 | -1.58374400 |
| O | 2.36820300  | -2.93194000 | -1.71022500 |
| H | 1.25336300  | -1.41572600 | -0.87678400 |

### IM5(SS)

NImag=0

Sum of electronic and zero-point Energies= -3189.585039

Sum of electronic and thermal Energies= -3189.524173

Sum of electronic and thermal Enthalpies= -3189.523229

Sum of electronic and thermal Free Energies= -3189.681719

|   |             |             |             |
|---|-------------|-------------|-------------|
| C | -1.75289000 | -0.35352400 | -0.27218800 |
| O | -1.58591800 | -0.85714100 | -1.36129800 |
| C | -0.90119200 | 0.69690300  | 0.37313300  |
| C | 0.44305900  | 0.91503200  | -0.32137500 |
| H | -0.81220700 | 0.46651900  | 1.43902500  |
| H | 0.27216100  | 0.83713300  | -1.40357200 |
| H | 0.52818400  | -1.50408600 | -1.08170300 |
| C | 1.03554800  | 2.28635100  | -0.04986200 |
| C | 0.89528800  | 2.91239900  | 1.19221300  |
| C | 1.76209000  | 2.93577500  | -1.05181800 |
| C | 1.46373200  | 4.16008400  | 1.42704900  |
| H | 0.33487500  | 2.42529500  | 1.98579000  |
| C | 2.32149800  | 4.18925900  | -0.82075200 |
| H | 1.88147900  | 2.45942800  | -2.02161400 |
| C | 2.17780700  | 4.80325000  | 0.41963900  |
| H | 1.34037700  | 4.63242000  | 2.39694400  |
| H | 2.86870500  | 4.68335700  | -1.61631100 |
| H | 2.61347000  | 5.78199600  | 0.59809300  |
| C | -5.42031500 | -4.57527100 | -3.40375700 |
| C | -6.36154600 | -3.54911200 | -3.36251200 |
| C | -6.03796700 | -2.36337400 | -2.70945200 |
| C | -3.83792800 | -3.23297300 | -2.15690200 |
| C | -4.16714300 | -4.42001000 | -2.80660000 |
| H | -5.66301200 | -5.50677200 | -3.90596600 |

|   |             |             |             |
|---|-------------|-------------|-------------|
| H | -7.33515800 | -3.67552800 | -3.82779600 |
| H | -2.86121900 | -3.09154000 | -1.70137100 |
| H | -3.44447800 | -5.22856700 | -2.85395700 |
| C | -4.78681000 | -2.21766600 | -2.11485800 |
| C | -4.65787900 | -0.85694800 | -1.46676000 |
| C | -6.11694500 | -0.27322700 | -1.47760400 |
| H | -3.97421700 | -0.19074600 | -1.99481000 |
| C | -6.86736300 | -1.11514700 | -2.53533900 |
| H | -6.08898600 | 0.78701100  | -1.73136200 |
| H | -7.89136200 | -1.30953500 | -2.20031600 |
| H | -6.93315000 | -0.56007700 | -3.47802600 |
| N | -4.18381800 | -0.98461700 | -0.08650400 |
| O | -6.75758800 | -0.31941100 | -0.20994600 |
| C | -5.02474600 | -1.39204700 | 0.90764200  |
| C | -6.47840200 | -1.46075000 | 0.57013900  |
| H | -6.71537000 | -2.39484400 | 0.04024600  |
| H | -7.07665700 | -1.39954300 | 1.47957000  |
| N | -4.39099700 | -1.56479000 | 2.03015400  |
| C | -2.98618200 | -0.80648900 | 0.48044000  |
| N | -3.10483200 | -1.22098500 | 1.73969600  |
| C | -2.07908700 | -1.43678000 | 2.72575700  |
| C | -1.23600300 | -2.54241500 | 2.55673500  |
| C | -2.03548100 | -0.59793100 | 3.84392800  |
| C | -0.30072000 | -2.78959500 | 3.55787000  |
| C | -1.08229800 | -0.90115200 | 4.81948100  |

|   |             |             |             |
|---|-------------|-------------|-------------|
| C | -0.21448800 | -1.98569500 | 4.69644900  |
| H | 0.37296800  | -3.63634300 | 3.44908900  |
| H | -1.02707600 | -0.26903000 | 5.70270700  |
| C | -1.34220700 | -3.43835900 | 1.34985700  |
| H | -2.38686600 | -3.65639100 | 1.10258700  |
| H | -0.86464400 | -2.97228400 | 0.48155500  |
| H | -0.83172700 | -4.38511400 | 1.53782800  |
| C | -2.96415000 | 0.57487500  | 3.99043400  |
| H | -2.80852100 | 1.05626400  | 4.95853400  |
| H | -2.81958900 | 1.30665000  | 3.18812200  |
| H | -4.00861800 | 0.25780400  | 3.91772900  |
| C | 0.80945800  | -2.29371700 | 5.75769500  |
| H | 0.64850300  | -3.29123100 | 6.17900000  |
| H | 1.81903400  | -2.27115000 | 5.33382400  |
| H | 0.76550700  | -1.56946700 | 6.57520800  |
| C | 3.52165100  | -0.01761800 | 1.15358600  |
| C | 2.13466100  | -0.12206700 | 1.34452100  |
| C | 1.58710700  | -0.08184000 | 2.61265400  |
| C | 2.42265800  | 0.12546800  | 3.71168600  |
| C | 3.78765400  | 0.29305300  | 3.51292500  |
| C | 4.35962300  | 0.22070700  | 2.23944500  |
| C | 2.65099000  | -0.10343500 | -0.95855800 |
| C | 1.45589300  | -0.20776700 | 0.00715300  |
| H | 0.51927000  | -0.20230200 | 2.76042900  |
| H | 1.99881400  | 0.17917600  | 4.71012300  |

|   |            |             |             |
|---|------------|-------------|-------------|
| H | 4.43832800 | 0.48223700  | 4.36138600  |
| H | 5.42843300 | 0.34288400  | 2.12787700  |
| O | 0.87799900 | -1.49269400 | -0.17186600 |
| O | 2.54612600 | -0.04109400 | -2.16451500 |
| N | 3.82208400 | -0.16854900 | -0.23044600 |
| C | 5.13239500 | -0.09912900 | -0.92037200 |
| C | 5.28521800 | 1.35873400  | -1.38556400 |
| C | 5.58165000 | 2.35139200  | -0.44342800 |
| C | 5.01473900 | 1.74899800  | -2.69899400 |
| C | 5.69256700 | 3.68449700  | -0.81996000 |
| H | 5.73744200 | 2.08056200  | 0.59701300  |
| C | 5.12375900 | 3.08634800  | -3.07701700 |
| H | 4.71063400 | 1.00711700  | -3.42880700 |
| C | 5.48608600 | 4.05429200  | -2.14685000 |
| H | 5.93293800 | 4.43493600  | -0.07293100 |
| H | 4.92215400 | 3.36608800  | -4.10669700 |
| H | 5.58141600 | 5.09401600  | -2.44655700 |
| C | 5.19933600 | -1.13474300 | -2.06520100 |
| C | 4.37824800 | -2.26249500 | -2.10546600 |
| C | 6.23522500 | -1.03047000 | -2.99680600 |
| C | 4.56467200 | -3.23915300 | -3.07926900 |
| H | 3.57926100 | -2.38632900 | -1.38054900 |
| C | 6.41855500 | -2.00354400 | -3.97348500 |
| H | 6.91027900 | -0.17992900 | -2.95640000 |
| C | 5.57926400 | -3.11236400 | -4.02237700 |



|   |             |             |             |
|---|-------------|-------------|-------------|
| H | 3.90719300  | -4.10294000 | -3.09910900 |
| H | 7.22414800  | -1.89461500 | -4.69309800 |
| H | 5.71899300  | -3.87333600 | -4.78372400 |
| C | 6.25510000  | -0.59183700 | 0.01265600  |
| C | 7.49734900  | 0.03462000  | 0.08941800  |
| C | 6.06225100  | -1.78850700 | 0.71385500  |
| C | 8.51053300  | -0.49901300 | 0.88806900  |
| H | 7.68533700  | 0.94442600  | -0.47047100 |
| C | 7.06639100  | -2.31530500 | 1.51253600  |
| H | 5.10805900  | -2.30307200 | 0.63767700  |
| C | 8.29766800  | -1.66687900 | 1.60886800  |
| H | 9.46962300  | 0.00736800  | 0.94004900  |
| H | 6.88952500  | -3.23694900 | 2.05832500  |
| H | 9.08519300  | -2.07749100 | 2.23310200  |
| C | -5.24719100 | 2.86863200  | 0.05044600  |
| C | -5.26241900 | 3.18003600  | -1.32138300 |
| C | -6.26749800 | 4.03442700  | -1.82817300 |
| C | -7.19322400 | 4.52451000  | -0.93675200 |
| C | -7.15611100 | 4.19314900  | 0.44951400  |
| C | -6.18826700 | 3.36514900  | 0.96737800  |
| H | -6.29308100 | 4.29019600  | -2.88264200 |
| H | -7.97802000 | 5.18632900  | -1.29068400 |
| H | -7.91346000 | 4.60970000  | 1.10660700  |
| H | -6.13512000 | 3.09594300  | 2.01638100  |
| N | -4.23684700 | 2.52784800  | -1.93326300 |

|   |             |            |             |
|---|-------------|------------|-------------|
| N | -3.59607100 | 1.85663500 | -0.99533300 |
| N | -4.18041900 | 2.03936500 | 0.18539200  |
| O | -3.73950600 | 1.46538300 | 1.27417900  |
| H | -1.52198700 | 1.60210200 | 0.33093700  |

### IM6(RR)

NImag=0

|                                              |              |
|----------------------------------------------|--------------|
| Sum of electronic and zero-point Energies=   | -3189.597569 |
| Sum of electronic and thermal Energies=      | -3189.536935 |
| Sum of electronic and thermal Enthalpies=    | -3189.535991 |
| Sum of electronic and thermal Free Energies= | -3189.695423 |

|   |             |             |             |
|---|-------------|-------------|-------------|
| C | 2.22179100  | -0.35193500 | 0.31242400  |
| O | 2.38718600  | -0.37470200 | 1.51160700  |
| C | 0.94248500  | -0.04593700 | -0.39115500 |
| C | -0.22789000 | 0.12536500  | 0.57249400  |
| H | 1.11282200  | 0.85709800  | -1.00144700 |
| H | 0.10051000  | 0.69888300  | 1.44538200  |
| H | -0.16464600 | 2.47929200  | -0.81993500 |
| C | -0.70480900 | -1.23260400 | 1.04679100  |
| C | -1.16889800 | -2.20219000 | 0.14700700  |
| C | -0.63449300 | -1.55982500 | 2.40317000  |
| C | -1.56857300 | -3.45762400 | 0.60051200  |
| H | -1.22466800 | -1.97166400 | -0.91646100 |
| C | -1.01975600 | -2.82011100 | 2.85552400  |
| H | -0.27131100 | -0.81481700 | 3.10544800  |

|   |             |             |             |
|---|-------------|-------------|-------------|
| C | -1.49647800 | -3.77085500 | 1.95678400  |
| H | -1.94025700 | -4.19253800 | -0.10908900 |
| H | -0.95109100 | -3.05634000 | 3.91358700  |
| H | -1.80822500 | -4.74943700 | 2.30858800  |
| C | 6.77476100  | -3.00184200 | 3.74357300  |
| C | 7.53537900  | -1.89620400 | 3.37056800  |
| C | 6.97427200  | -0.94829100 | 2.51925600  |
| C | 4.89982100  | -2.20841300 | 2.43373200  |
| C | 5.46691000  | -3.15819000 | 3.27910000  |
| H | 7.20249000  | -3.75012000 | 4.40376000  |
| H | 8.55194300  | -1.77853100 | 3.73520800  |
| H | 3.87647200  | -2.31133300 | 2.08385700  |
| H | 4.88657500  | -4.02337500 | 3.58340500  |
| C | 5.66923100  | -1.11090600 | 2.06049900  |
| C | 5.27345200  | 0.03466400  | 1.15627700  |
| C | 6.61046700  | 0.81482100  | 0.88831300  |
| H | 4.53103800  | 0.70329900  | 1.59104600  |
| C | 7.58298300  | 0.32496700  | 1.98687700  |
| H | 6.40386500  | 1.88253300  | 0.93241300  |
| H | 8.58380600  | 0.18879300  | 1.56433800  |
| H | 7.66813400  | 1.07567400  | 2.78076700  |
| N | 4.71385700  | -0.46847000 | -0.10495200 |
| O | 7.14701300  | 0.62195900  | -0.41304900 |
| C | 5.52670200  | -0.88796900 | -1.11546200 |
| C | 6.99458100  | -0.67343500 | -0.94463000 |

|   |             |             |             |
|---|-------------|-------------|-------------|
| H | 7.42537100  | -1.44620800 | -0.29042400 |
| H | 7.49344600  | -0.70258100 | -1.91384000 |
| N | 4.83926100  | -1.33902500 | -2.12653700 |
| C | 3.45336800  | -0.64909300 | -0.52208800 |
| N | 3.54433800  | -1.18788500 | -1.73549800 |
| C | 2.47194500  | -1.63320000 | -2.58729900 |
| C | 1.79091600  | -2.80133800 | -2.22810800 |
| C | 2.13674800  | -0.84682500 | -3.69099000 |
| C | 0.72057800  | -3.18305900 | -3.03140100 |
| C | 1.06734700  | -1.29070500 | -4.47026600 |
| C | 0.34467100  | -2.44005800 | -4.15411600 |
| H | 0.16221900  | -4.07945600 | -2.77027600 |
| H | 0.78239500  | -0.70251400 | -5.33953300 |
| C | 2.13417800  | -3.56582600 | -0.97518600 |
| H | 3.21566100  | -3.64012200 | -0.82177900 |
| H | 1.69176500  | -3.08647500 | -0.08966700 |
| H | 1.72528000  | -4.57730200 | -1.02410900 |
| C | 2.82864600  | 0.45655600  | -3.98424500 |
| H | 2.63942700  | 0.75634600  | -5.01756000 |
| H | 2.43879000  | 1.24280800  | -3.32199000 |
| H | 3.90881500  | 0.38951700  | -3.83446900 |
| C | -0.84443400 | -2.86022700 | -4.97603900 |
| H | -1.77166000 | -2.57389700 | -4.46663000 |
| H | -0.84028600 | -2.37728100 | -5.95660400 |
| H | -0.86076500 | -3.94374700 | -5.12457800 |

|   |             |             |             |
|---|-------------|-------------|-------------|
| C | -3.20514400 | 0.21290400  | -1.21229700 |
| C | -1.86690200 | 0.59444100  | -1.38999400 |
| C | -1.28115700 | 0.59381800  | -2.64457900 |
| C | -2.04096000 | 0.18060200  | -3.74282200 |
| C | -3.36597600 | -0.20056600 | -3.56474700 |
| C | -3.97069800 | -0.18437100 | -2.30440600 |
| C | -2.54686900 | 1.01513800  | 0.83310800  |
| C | -1.30004200 | 1.05658300  | -0.07180700 |
| H | -0.25974600 | 0.94618400  | -2.77532800 |
| H | -1.60295500 | 0.17988500  | -4.73679500 |
| H | -3.95950500 | -0.50498800 | -4.42217700 |
| H | -5.00580500 | -0.47845600 | -2.20173300 |
| O | -0.82089700 | 2.37021200  | -0.08468700 |
| O | -2.60307900 | 1.47794000  | 1.94476300  |
| N | -3.56595200 | 0.32939200  | 0.15651300  |
| C | -4.95874300 | 0.26497800  | 0.67113900  |
| C | -5.62253500 | 1.58993600  | 0.25992200  |
| C | -6.41207500 | 1.71082700  | -0.88561700 |
| C | -5.30255000 | 2.75299200  | 0.97469600  |
| C | -6.88952000 | 2.95450800  | -1.29621700 |
| H | -6.67032000 | 0.83221400  | -1.46665300 |
| C | -5.77909600 | 3.99212400  | 0.56389300  |
| H | -4.66346300 | 2.68015900  | 1.84890900  |
| C | -6.57870700 | 4.09881800  | -0.57199700 |
| H | -7.50344000 | 3.02117200  | -2.18939800 |

|   |             |             |             |
|---|-------------|-------------|-------------|
| H | -5.51763700 | 4.87886000  | 1.13303400  |
| H | -6.94993900 | 5.06744100  | -0.89266200 |
| C | -4.95602900 | 0.01493500  | 2.19518500  |
| C | -4.05862300 | -0.91277800 | 2.73088800  |
| C | -5.94059800 | 0.55104100  | 3.02066900  |
| C | -4.11309900 | -1.25716500 | 4.07245500  |
| H | -3.30653000 | -1.36436500 | 2.08951300  |
| C | -6.00173000 | 0.19680200  | 4.36897900  |
| H | -6.66525300 | 1.25307700  | 2.62057300  |
| C | -5.08599400 | -0.70076400 | 4.90261900  |
| H | -3.39263100 | -1.96773100 | 4.46770800  |
| H | -6.77174600 | 0.63116200  | 4.99967700  |
| H | -5.13072600 | -0.97042700 | 5.95345900  |
| C | -5.67192200 | -1.00158000 | 0.16217700  |
| C | -7.06666900 | -1.07898700 | 0.19208600  |
| C | -4.94791100 | -2.14993900 | -0.16600600 |
| C | -7.72155300 | -2.26048300 | -0.14284600 |
| H | -7.64614400 | -0.21020800 | 0.49059900  |
| C | -5.60186900 | -3.33181700 | -0.49812200 |
| H | -3.86310700 | -2.11808200 | -0.16212400 |
| C | -6.99230500 | -3.39225000 | -0.49597900 |
| H | -8.80649200 | -2.29555800 | -0.11816700 |
| H | -5.01760200 | -4.21065000 | -0.75553200 |
| H | -7.50332100 | -4.31421600 | -0.75569000 |
| C | 2.44519500  | 4.04624300  | -0.42851300 |

|   |            |             |             |
|---|------------|-------------|-------------|
| C | 3.65623400 | 3.82927700  | 0.24888800  |
| C | 4.18510700 | 4.84685200  | 1.07271600  |
| C | 3.46661900 | 6.01439000  | 1.17458800  |
| C | 2.23410100 | 6.20599900  | 0.48494200  |
| C | 1.70093800 | 5.23311800  | -0.32694200 |
| H | 5.12342100 | 4.70374300  | 1.59964500  |
| H | 3.84058300 | 6.81917300  | 1.80008200  |
| H | 1.70763800 | 7.14670200  | 0.61101500  |
| H | 0.76211300 | 5.34935900  | -0.85646800 |
| N | 4.10612900 | 2.58105800  | -0.05135400 |
| N | 3.23331700 | 2.04110800  | -0.87947500 |
| N | 2.24380200 | 2.89208100  | -1.11427800 |
| O | 1.22976400 | 2.58661800  | -1.89552200 |
| H | 0.72261700 | -0.83700200 | -1.11458300 |

### IM6(RS)

NImag=0

|                                              |              |
|----------------------------------------------|--------------|
| Sum of electronic and zero-point Energies=   | -2718.843236 |
| Sum of electronic and thermal Energies=      | -2718.791407 |
| Sum of electronic and thermal Enthalpies=    | -2718.790462 |
| Sum of electronic and thermal Free Energies= | -2718.929238 |

|   |            |             |            |
|---|------------|-------------|------------|
| C | 2.23489900 | -0.34260900 | 1.60086300 |
| O | 3.22540600 | -0.04828400 | 2.34845800 |
| C | 1.70741100 | -1.82129700 | 1.55695000 |
| C | 0.29683200 | -1.78974400 | 2.14673700 |

|   |              |              |              |
|---|--------------|--------------|--------------|
| H | 1. 68707700  | -2. 21357300 | 0. 53916900  |
| H | 0. 37228600  | -1. 81226700 | 3. 24057500  |
| C | -0. 68838300 | -2. 85248700 | 1. 71287900  |
| C | -0. 72931800 | -3. 35117500 | 0. 40507400  |
| C | -1. 63396900 | -3. 32451300 | 2. 63054300  |
| C | -1. 67120200 | -4. 30873600 | 0. 03748000  |
| H | -0. 03059500 | -2. 98564500 | -0. 34181700 |
| C | -2. 57632600 | -4. 28237900 | 2. 26552600  |
| H | -1. 62447900 | -2. 93461300 | 3. 64571900  |
| C | -2. 59482400 | -4. 78334700 | 0. 96569300  |
| H | -1. 68100900 | -4. 68159100 | -0. 98304600 |
| H | -3. 29282500 | -4. 64058600 | 2. 99925200  |
| H | -3. 32414800 | -5. 53494100 | 0. 67764100  |
| C | 3. 70634500  | 5. 63210500  | 1. 90256700  |
| C | 2. 82462100  | 5. 87261700  | 0. 85086700  |
| C | 2. 13418000  | 4. 79754800  | 0. 29786100  |
| C | 3. 20803000  | 3. 25740800  | 1. 85498100  |
| C | 3. 89611800  | 4. 33947300  | 2. 39957900  |
| H | 4. 25502300  | 6. 46055600  | 2. 34113700  |
| H | 2. 68463200  | 6. 87946900  | 0. 46669300  |
| H | 3. 34071800  | 2. 23809700  | 2. 22567100  |
| H | 4. 58920400  | 4. 17671000  | 3. 21914600  |
| C | 2. 33409600  | 3. 51658400  | 0. 80275100  |
| C | 1. 49063000  | 2. 50496500  | 0. 06707300  |
| C | 0. 87029600  | 3. 29388100  | -1. 14308400 |



|   |             |             |             |
|---|-------------|-------------|-------------|
| H | 0.71602300  | 2.09287900  | 0.71194700  |
| C | 1.12723100  | 4.78938800  | -0.82681600 |
| H | -0.19752300 | 3.07820900  | -1.21352800 |
| H | 1.47446900  | 5.30423000  | -1.72962400 |
| H | 0.19112300  | 5.27413700  | -0.52480400 |
| N | 2.30719000  | 1.38090100  | -0.39402100 |
| O | 1.38162900  | 2.91588800  | -2.41215200 |
| C | 2.99431400  | 1.46182800  | -1.57404500 |
| C | 2.77336900  | 2.66820300  | -2.42215000 |
| H | 3.34052800  | 3.52998600  | -2.04025100 |
| H | 3.07320700  | 2.46656000  | -3.45095800 |
| N | 3.66203100  | 0.37793400  | -1.81404700 |
| C | 2.55924800  | 0.17228600  | 0.14510900  |
| N | 3.39390400  | -0.40979800 | -0.72352400 |
| C | 3.94317800  | -1.73853500 | -0.68489000 |
| C | 5.10153600  | -1.97144700 | 0.05726300  |
| C | 3.30621500  | -2.72306000 | -1.44844400 |
| C | 5.59183100  | -3.27857000 | 0.06756800  |
| C | 3.83713900  | -4.00860200 | -1.40162600 |
| C | 4.96960800  | -4.30545000 | -0.63973200 |
| H | 6.48988600  | -3.49384900 | 0.64179000  |
| H | 3.35579800  | -4.79745600 | -1.97556500 |
| C | 5.79631300  | -0.85655600 | 0.78911900  |
| H | 6.04693900  | -0.04467000 | 0.09682700  |
| H | 5.13546500  | -0.45105200 | 1.56460000  |

|   |             |             |             |
|---|-------------|-------------|-------------|
| H | 6.72201500  | -1.21828100 | 1.24256200  |
| C | 2.10794200  | -2.39322900 | -2.30029700 |
| H | 1.63231100  | -3.30700000 | -2.66671100 |
| H | 1.35891500  | -1.80497700 | -1.75845600 |
| H | 2.40684500  | -1.79314800 | -3.16747100 |
| C | 5.49820800  | -5.71568700 | -0.57701100 |
| H | 6.55895800  | -5.73085900 | -0.31354200 |
| H | 4.96001400  | -6.29714800 | 0.17982800  |
| H | 5.37435200  | -6.22793300 | -1.53531200 |
| C | -2.41355200 | 0.34475600  | 1.74797200  |
| C | -1.33085000 | 0.14295100  | 2.60802900  |
| C | -1.43659600 | 0.38221700  | 3.96564400  |
| C | -2.65727000 | 0.82819900  | 4.47528100  |
| C | -3.73375000 | 1.03032400  | 3.61538300  |
| C | -3.63195200 | 0.79909600  | 2.24121200  |
| C | -0.67632100 | -0.23355400 | 0.37410900  |
| C | -0.15580000 | -0.33917800 | 1.81815600  |
| H | -0.56983300 | 0.24236800  | 4.60604200  |
| H | -2.76497600 | 1.02852500  | 5.53623700  |
| H | -4.67963400 | 1.38525900  | 4.01277200  |
| H | -4.47928800 | 0.98389500  | 1.59238000  |
| O | 0.99268100  | 0.43625600  | 1.98055300  |
| O | 0.04046800  | -0.38272700 | -0.59719900 |
| N | -2.02057100 | 0.08528400  | 0.39738100  |
| C | -2.91582000 | 0.23345300  | -0.77955400 |

|   |             |             |             |
|---|-------------|-------------|-------------|
| C | -4.23624500 | -0.49627900 | -0.42753900 |
| C | -5.49378400 | -0.02397500 | -0.80510400 |
| C | -4.17074300 | -1.68672900 | 0.30933700  |
| C | -6.65073000 | -0.72796700 | -0.47085200 |
| H | -5.59489300 | 0.91262000  | -1.33929100 |
| C | -5.32303700 | -2.38968200 | 0.63840500  |
| H | -3.20791100 | -2.06551100 | 0.64289900  |
| C | -6.57265600 | -1.91429700 | 0.24806400  |
| H | -7.61664600 | -0.33443500 | -0.77290400 |
| H | -5.23422500 | -3.30751900 | 1.21213500  |
| H | -7.47468100 | -2.45812500 | 0.51113300  |
| C | -2.25954600 | -0.44146600 | -2.01887300 |
| C | -1.39378200 | 0.28992500  | -2.84224700 |
| C | -2.44999900 | -1.79291700 | -2.30124200 |
| C | -0.72944600 | -0.31206000 | -3.90065200 |
| H | -1.19683700 | 1.33654100  | -2.63406400 |
| C | -1.77887400 | -2.40245900 | -3.36244300 |
| H | -3.11853300 | -2.39387300 | -1.69698400 |
| C | -0.91626200 | -1.66804300 | -4.16567400 |
| H | -0.05147200 | 0.28017100  | -4.50787000 |
| H | -1.94702400 | -3.45717900 | -3.56166900 |
| H | -0.39584000 | -2.14376400 | -4.99187500 |
| C | -3.13728700 | 1.72767600  | -1.08307400 |
| C | -3.76751100 | 2.09634900  | -2.28037900 |
| C | -2.69526800 | 2.74419700  | -0.23568200 |

|   |             |             |             |
|---|-------------|-------------|-------------|
| C | -3.97561400 | 3.43091000  | -2.60348000 |
| H | -4.07182400 | 1.32263400  | -2.98025700 |
| C | -2.90334100 | 4.08722800  | -0.55893100 |
| H | -2.17609100 | 2.50677400  | 0.68610600  |
| C | -3.54690700 | 4.43688600  | -1.73881100 |
| H | -4.46361400 | 3.68555100  | -3.53926300 |
| H | -2.55569400 | 4.85673900  | 0.12442500  |
| H | -3.70712200 | 5.48084600  | -1.98945800 |
| H | 2.39582000  | -2.42859500 | 2.14759200  |

### IM6(SR)

NImag=0

|                                              |              |
|----------------------------------------------|--------------|
| Sum of electronic and zero-point Energies=   | -2718.841870 |
| Sum of electronic and thermal Energies=      | -2718.789946 |
| Sum of electronic and thermal Enthalpies=    | -2718.789002 |
| Sum of electronic and thermal Free Energies= | -2718.927920 |

|   |             |            |            |
|---|-------------|------------|------------|
| C | 2.22247500  | 0.63950700 | 1.39194400 |
| O | 2.85210300  | 0.41674900 | 2.48629700 |
| C | 1.34258900  | 1.90084000 | 1.30684400 |
| C | 0.09556200  | 1.40925000 | 2.02803900 |
| H | 1.82164600  | 2.74804700 | 1.80347000 |
| H | 0.37771700  | 1.19461300 | 3.06641600 |
| H | 1.09845200  | 2.15794200 | 0.27101000 |
| C | -1.10834500 | 2.31964700 | 2.01818100 |
| C | -1.13684000 | 3.49552200 | 1.26376600 |

|   |             |             |             |
|---|-------------|-------------|-------------|
| C | -2.22716100 | 2.00209900  | 2.80000100  |
| C | -2.25322800 | 4.33024800  | 1.28656700  |
| H | -0.27973300 | 3.77172600  | 0.65705200  |
| C | -3.35090100 | 2.82330800  | 2.80532900  |
| H | -2.21151400 | 1.10190000  | 3.41146700  |
| C | -3.36922100 | 3.99203300  | 2.04544000  |
| H | -2.24892300 | 5.24662700  | 0.70308000  |
| H | -4.21113900 | 2.55497500  | 3.41253100  |
| H | -4.24279000 | 4.63646700  | 2.05459100  |
| C | 2.19118400  | -5.40097000 | -1.08938700 |
| C | 3.40779800  | -5.42343700 | -0.41120000 |
| C | 3.86477800  | -4.25148300 | 0.18147900  |
| C | 1.89614400  | -3.04887000 | -0.58059800 |
| C | 1.44192100  | -4.22576300 | -1.17244100 |
| H | 1.82054700  | -6.30812900 | -1.55771100 |
| H | 3.99031200  | -6.33871000 | -0.34939300 |
| H | 1.31595400  | -2.13092200 | -0.62707600 |
| H | 0.49081100  | -4.22608800 | -1.69446600 |
| C | 3.11308200  | -3.08067300 | 0.09271600  |
| C | 3.80487700  | -1.95508300 | 0.82975100  |
| C | 5.25704200  | -2.49258200 | 1.07167200  |
| H | 3.31330400  | -1.68462600 | 1.77037400  |
| C | 5.12086100  | -4.02625600 | 0.98752200  |
| H | 5.62727900  | -2.15705300 | 2.04144000  |
| H | 6.02161700  | -4.45834400 | 0.54120500  |

|   |            |             |             |
|---|------------|-------------|-------------|
| H | 5.01531800 | -4.45155700 | 1.99288100  |
| N | 3.86909500 | -0.72104000 | 0.05461100  |
| O | 6.22361600 | -2.00584200 | 0.14119600  |
| C | 4.78234900 | -0.53975700 | -0.94248100 |
| C | 5.75275400 | -1.65521400 | -1.14723500 |
| H | 5.27604200 | -2.50313000 | -1.65730600 |
| H | 6.61045900 | -1.31573600 | -1.72823600 |
| N | 4.73003900 | 0.66773900  | -1.42249500 |
| C | 3.19886900 | 0.42992600  | 0.21145800  |
| N | 3.72251500 | 1.25509400  | -0.69202300 |
| C | 3.44382400 | 2.65748800  | -0.82969500 |
| C | 2.58342700 | 3.07462900  | -1.84363800 |
| C | 4.01418500 | 3.51986100  | 0.10992800  |
| C | 2.29922900 | 4.43815100  | -1.91017800 |
| C | 3.69529300 | 4.87134300  | 0.00122500  |
| C | 2.84555600 | 5.34534800  | -1.00077300 |
| H | 1.62477400 | 4.79599900  | -2.68452100 |
| H | 4.11610700 | 5.57056900  | 0.72015600  |
| C | 1.94568200 | 2.07452200  | -2.76920000 |
| H | 2.69794900 | 1.41965600  | -3.21988000 |
| H | 1.23209900 | 1.44732800  | -2.21971600 |
| H | 1.40313000 | 2.58296300  | -3.56901800 |
| C | 4.90171900 | 2.98883300  | 1.20618000  |
| H | 5.29524200 | 3.81024200  | 1.80882000  |
| H | 4.35860300 | 2.30059000  | 1.86902300  |

|   |             |             |             |
|---|-------------|-------------|-------------|
| H | 5.74953900  | 2.43716900  | 0.78446700  |
| C | 2.54326000  | 6.81821400  | -1.10707300 |
| H | 1.61590600  | 6.99504700  | -1.65779200 |
| H | 2.44773800  | 7.27435500  | -0.11777200 |
| H | 3.34859200  | 7.34118600  | -1.63444100 |
| C | -2.08852400 | -1.25116600 | 1.53616100  |
| C | -0.86425900 | -0.98490900 | 2.15728700  |
| C | -0.47787000 | -1.61598700 | 3.32284700  |
| C | -1.34858600 | -2.54371000 | 3.89828400  |
| C | -2.56700300 | -2.81476400 | 3.28301700  |
| C | -2.95693400 | -2.18285500 | 2.09769100  |
| C | -0.96379100 | 0.11633600  | 0.08047500  |
| C | -0.09362700 | 0.01143400  | 1.35057400  |
| H | 0.49964100  | -1.39189900 | 3.74475500  |
| H | -1.07409700 | -3.06101600 | 4.81176800  |
| H | -3.24202100 | -3.54142000 | 3.72506700  |
| H | -3.91410000 | -2.42166300 | 1.65536600  |
| O | 1.19786300  | -0.42671700 | 1.02766600  |
| O | -0.61301800 | 0.61289800  | -0.96838500 |
| N | -2.20170400 | -0.46875200 | 0.34498900  |
| C | -3.22276100 | -0.67167900 | -0.71498000 |
| C | -2.77572400 | -1.90648300 | -1.51620100 |
| C | -3.19886300 | -3.19565300 | -1.18217000 |
| C | -1.82673000 | -1.76268500 | -2.53818900 |
| C | -2.73222700 | -4.30672200 | -1.88171000 |

|   |             |             |             |
|---|-------------|-------------|-------------|
| H | -3.91767400 | -3.34186600 | -0.38366000 |
| C | -1.36534600 | -2.87110000 | -3.24019900 |
| H | -1.45515500 | -0.77277700 | -2.78105500 |
| C | -1.82775900 | -4.14775900 | -2.92538200 |
| H | -3.08654900 | -5.29642500 | -1.61027600 |
| H | -0.63998000 | -2.73489500 | -4.03693000 |
| H | -1.47593800 | -5.01159800 | -3.48250200 |
| C | -3.37627900 | 0.59792000  | -1.58143100 |
| C | -3.27544800 | 1.86172200  | -0.99695000 |
| C | -3.80961000 | 0.50275600  | -2.90375500 |
| C | -3.55583500 | 3.00495300  | -1.73331600 |
| H | -2.97409800 | 1.95395300  | 0.04254900  |
| C | -4.09347400 | 1.65027800  | -3.64159400 |
| H | -3.93107200 | -0.47055600 | -3.36889700 |
| C | -3.96235600 | 2.90667200  | -3.06252100 |
| H | -3.45870900 | 3.97636900  | -1.25777800 |
| H | -4.42362100 | 1.55407200  | -4.67167800 |
| H | -4.18456600 | 3.80108700  | -3.63663700 |
| C | -4.62779800 | -0.78426700 | -0.09285100 |
| C | -5.65616300 | -1.44616000 | -0.76666700 |
| C | -4.93736400 | -0.08097700 | 1.07457500  |
| C | -6.95250500 | -1.44912500 | -0.25734700 |
| H | -5.44814100 | -1.96025300 | -1.70009700 |
| C | -6.23085500 | -0.08503100 | 1.58352800  |
| H | -4.15633900 | 0.46822700  | 1.59176200  |



|   |             |             |             |
|---|-------------|-------------|-------------|
| C | -7.24444800 | -0.77670200 | 0.92477400  |
| H | -7.73580900 | -1.97682400 | -0.79293800 |
| H | -6.44651000 | 0.45835400  | 2.49881600  |
| H | -8.25418500 | -0.78207300 | 1.32340800  |

### IM6(SS)

NImag=0

|                                              |              |
|----------------------------------------------|--------------|
| Sum of electronic and zero-point Energies=   | -2718.833140 |
| Sum of electronic and thermal Energies=      | -2718.781086 |
| Sum of electronic and thermal Enthalpies=    | -2718.780142 |
| Sum of electronic and thermal Free Energies= | -2718.919506 |

|   |             |             |             |
|---|-------------|-------------|-------------|
| C | -2.15011000 | 0.14193700  | 1.50606600  |
| O | -2.26413400 | 0.59707400  | 2.68846300  |
| C | -2.34861500 | -1.37236900 | 1.25404300  |
| C | -0.93082500 | -1.92901500 | 1.34513000  |
| H | -3.02161400 | -1.78344500 | 2.00996700  |
| H | -0.59620800 | -1.84458000 | 2.38768200  |
| H | -2.77195300 | -1.57031100 | 0.26406300  |
| C | -0.70220400 | -3.33896500 | 0.84944200  |
| C | -1.72980400 | -4.10861200 | 0.30096500  |
| C | 0.58345400  | -3.89287600 | 0.91759200  |
| C | -1.48211800 | -5.39373900 | -0.17810500 |
| H | -2.73962500 | -3.70931600 | 0.24940900  |
| C | 0.83111500  | -5.17356700 | 0.43703600  |
| H | 1.39744100  | -3.32481900 | 1.36686000  |

|   |             |             |             |
|---|-------------|-------------|-------------|
| C | -0.20081300 | -5.92938000 | -0.11603600 |
| H | -2.29675900 | -5.97623200 | -0.59941300 |
| H | 1.83595200  | -5.57977700 | 0.50166500  |
| H | -0.00738100 | -6.93054300 | -0.48964000 |
| C | 1.13702100  | 4.40036900  | -2.15637000 |
| C | 0.69675500  | 5.25554400  | -1.14707000 |
| C | -0.16365700 | 4.75933200  | -0.17308300 |
| C | -0.12914400 | 2.56313900  | -1.20962400 |
| C | 0.72345200  | 3.06656500  | -2.19164900 |
| H | 1.79835000  | 4.78033800  | -2.92980100 |
| H | 1.01059900  | 6.29559600  | -1.12988500 |
| H | -0.45271300 | 1.52657400  | -1.22509400 |
| H | 1.07259200  | 2.40699500  | -2.98200600 |
| C | -0.56225000 | 3.42400200  | -0.20576100 |
| C | -1.50971900 | 3.12675600  | 0.93888600  |
| C | -1.92912800 | 4.54149400  | 1.46076800  |
| H | -1.05817400 | 2.52303100  | 1.73174900  |
| C | -0.78988600 | 5.47571000  | 0.99901500  |
| H | -2.04150200 | 4.52729300  | 2.54563200  |
| H | -1.19073500 | 6.46375000  | 0.75329500  |
| H | -0.06036500 | 5.60844000  | 1.80725200  |
| N | -2.68587300 | 2.39689100  | 0.48281700  |
| O | -3.19848000 | 4.98261500  | 0.98471500  |
| C | -3.70564400 | 3.01943400  | -0.17449400 |
| C | -3.60913100 | 4.50614100  | -0.28255800 |

|   |             |             |             |
|---|-------------|-------------|-------------|
| H | -2.90576200 | 4.79172400  | -1.07740600 |
| H | -4.58768100 | 4.93853800  | -0.49296600 |
| N | -4.64586500 | 2.18149900  | -0.49754500 |
| C | -2.98694100 | 1.09148500  | 0.58129800  |
| N | -4.17339400 | 0.98101200  | -0.01866500 |
| C | -4.90585200 | -0.23592400 | -0.21227900 |
| C | -4.87314900 | -0.82291600 | -1.47941900 |
| C | -5.54010600 | -0.81024000 | 0.89017500  |
| C | -5.48358500 | -2.06690000 | -1.62037100 |
| C | -6.13509000 | -2.05720000 | 0.69464200  |
| C | -6.10397100 | -2.70256700 | -0.54168900 |
| H | -5.46782600 | -2.55482100 | -2.59242400 |
| H | -6.63035600 | -2.53807200 | 1.53486700  |
| C | -4.20156700 | -0.13118700 | -2.63726600 |
| H | -4.77253200 | 0.75054600  | -2.94517800 |
| H | -3.19361400 | 0.21035600  | -2.37463400 |
| H | -4.11901000 | -0.80699200 | -3.49200400 |
| C | -5.56291000 | -0.11259600 | 2.22552600  |
| H | -6.14855200 | -0.69060400 | 2.94374200  |
| H | -4.55390000 | 0.03549000  | 2.63408400  |
| H | -6.02122600 | 0.87791900  | 2.12891000  |
| C | -6.70533100 | -4.07483300 | -0.70764300 |
| H | -7.14114800 | -4.20036000 | -1.70245000 |
| H | -5.93923000 | -4.84829200 | -0.58233700 |
| H | -7.48519200 | -4.25824600 | 0.03565400  |

|   |             |             |             |
|---|-------------|-------------|-------------|
| C | 1.41085400  | -0.73835200 | -1.21407400 |
| C | 0.07264500  | -1.03027000 | -0.90106900 |
| C | -0.83388000 | -1.36901100 | -1.88988900 |
| C | -0.41291700 | -1.41464400 | -3.22065900 |
| C | 0.91376800  | -1.13820600 | -3.52672000 |
| C | 1.84471800  | -0.80502800 | -2.53763400 |
| C | 1.31021100  | -0.70813100 | 1.07656800  |
| C | -0.13569200 | -0.85287300 | 0.58281500  |
| H | -1.85880000 | -1.62527400 | -1.63345900 |
| H | -1.11207200 | -1.68330700 | -4.00621500 |
| H | 1.25174300  | -1.18863700 | -4.55744700 |
| H | 2.87006500  | -0.61254100 | -2.82183300 |
| O | -0.77682100 | 0.37233200  | 0.87168600  |
| O | 1.67912800  | -0.80850300 | 2.22174200  |
| N | 2.11993300  | -0.41295500 | -0.02056700 |
| C | 3.58943500  | -0.35506500 | 0.17876500  |
| C | 4.01349600  | -1.80086000 | 0.49015000  |
| C | 4.01836100  | -2.74836400 | -0.54159300 |
| C | 4.21962000  | -2.24260200 | 1.79965800  |
| C | 4.26437000  | -4.09135800 | -0.27821300 |
| H | 3.82081000  | -2.43619500 | -1.56283600 |
| C | 4.46419400  | -3.58899100 | 2.06383600  |
| H | 4.15553100  | -1.53715800 | 2.61989300  |
| C | 4.49691500  | -4.51654400 | 1.02799100  |
| H | 4.26562800  | -4.80626300 | -1.09568700 |

|   |             |              |              |
|---|-------------|--------------|--------------|
| H | 4. 61964300 | -3. 91032800 | 3. 08916800  |
| H | 4. 69091100 | -5. 56470700 | 1. 23661100  |
| C | 3. 93981900 | 0. 66039200  | 1. 28575200  |
| C | 3. 06615700 | 1. 67880400  | 1. 66856700  |
| C | 5. 23896400 | 0. 66257200  | 1. 79785100  |
| C | 3. 47702800 | 2. 65687200  | 2. 56904000  |
| H | 2. 05561800 | 1. 71139100  | 1. 27056500  |
| C | 5. 64703300 | 1. 63650500  | 2. 70263600  |
| H | 5. 94123800 | -0. 10409200 | 1. 48009500  |
| C | 4. 76475100 | 2. 63875200  | 3. 09539000  |
| H | 2. 77851700 | 3. 43459900  | 2. 86356300  |
| H | 6. 65944600 | 1. 61357700  | 3. 09439800  |
| H | 5. 08031400 | 3. 40082600  | 3. 80133800  |
| C | 4. 27027700 | 0. 26151200  | -1. 05374100 |
| C | 5. 44608400 | -0. 24716700 | -1. 60055700 |
| C | 3. 74091300 | 1. 44701100  | -1. 57694000 |
| C | 6. 05257800 | 0. 38847600  | -2. 68590400 |
| H | 5. 89611700 | -1. 14491700 | -1. 18998800 |
| C | 4. 33858900 | 2. 07358000  | -2. 66029000 |
| H | 2. 84344000 | 1. 87108400  | -1. 13383700 |
| C | 5. 49712400 | 1. 54057700  | -3. 22757000 |
| H | 6. 96487000 | -0. 02602700 | -3. 10402900 |
| H | 3. 90213600 | 2. 98569900  | -3. 05797300 |
| H | 5. 96785600 | 2. 02918100  | -4. 07505000 |

**TS6(RR)**

NImag=1 (-199.1186)

|                                              |              |
|----------------------------------------------|--------------|
| Sum of electronic and zero-point Energies=   | -2718.826635 |
| Sum of electronic and thermal Energies=      | -2718.774660 |
| Sum of electronic and thermal Enthalpies=    | -2718.773716 |
| Sum of electronic and thermal Free Energies= | -2718.914292 |

|   |             |             |             |
|---|-------------|-------------|-------------|
| C | 2.03330300  | -0.51256900 | 1.26760900  |
| O | 2.69912800  | -0.23581400 | 2.26279300  |
| C | 1.62488700  | -1.94803200 | 0.87987600  |
| C | 0.10766200  | -1.88223500 | 1.04176200  |
| H | 1.90195200  | -2.18569500 | -0.15056100 |
| H | -0.10704200 | -1.79393300 | 2.11458200  |
| C | -0.74802800 | -2.98384300 | 0.47427400  |
| C | -0.60204900 | -3.46250200 | -0.83235000 |
| C | -1.75707600 | -3.52942400 | 1.27350800  |
| C | -1.44966400 | -4.45272600 | -1.32341200 |
| H | 0.17271200  | -3.05544600 | -1.47611500 |
| C | -2.60850100 | -4.51735800 | 0.78572700  |
| H | -1.87555400 | -3.16467000 | 2.29171800  |
| C | -2.45514300 | -4.98298600 | -0.51725500 |
| H | -1.32237300 | -4.81153900 | -2.34039200 |
| H | -3.38930900 | -4.92078400 | 1.42352700  |
| H | -3.11313500 | -5.75675400 | -0.90175400 |
| C | 2.68164300  | 5.42951700  | 2.41727100  |
| C | 2.52621900  | 5.75752800  | 1.07182600  |

|   |            |             |             |
|---|------------|-------------|-------------|
| C | 2.39785500 | 4.72906000  | 0.14323400  |
| C | 2.57457900 | 3.05981800  | 1.90610300  |
| C | 2.70452300 | 4.09546700  | 2.82969300  |
| H | 2.78864400 | 6.22061000  | 3.15359600  |
| H | 2.51173200 | 6.79675100  | 0.75432000  |
| H | 2.58854400 | 2.01672800  | 2.21982900  |
| H | 2.82398900 | 3.86078700  | 3.88280400  |
| C | 2.42455600 | 3.40205400  | 0.56577200  |
| C | 2.26623000 | 2.46188400  | -0.60910900 |
| C | 2.44298200 | 3.38040400  | -1.86928500 |
| H | 1.28685700 | 1.97970700  | -0.60847200 |
| C | 2.20118200 | 4.81642100  | -1.35076500 |
| H | 1.72799600 | 3.09801600  | -2.64458800 |
| H | 2.88472900 | 5.51182100  | -1.84867000 |
| H | 1.17968300 | 5.13628500  | -1.58938600 |
| N | 3.27056800 | 1.40313700  | -0.60350100 |
| O | 3.71000100 | 3.24978400  | -2.50222100 |
| C | 4.55147900 | 1.66331100  | -1.01589000 |
| C | 4.80214500 | 2.99791700  | -1.63584200 |
| H | 4.89958700 | 3.77731700  | -0.86716400 |
| H | 5.70688400 | 2.97575700  | -2.24377200 |
| N | 5.30633200 | 0.61453900  | -0.89687900 |
| C | 3.19324800 | 0.11994800  | -0.17589900 |
| N | 4.44387100 | -0.32069100 | -0.36852900 |
| C | 4.90742100 | -1.64697200 | -0.08080300 |

|   |             |             |             |
|---|-------------|-------------|-------------|
| C | 5.59483700  | -1.86873900 | 1.11503800  |
| C | 4.64561000  | -2.66132400 | -1.00497000 |
| C | 6.00065700  | -3.17443500 | 1.38541100  |
| C | 5.06813800  | -3.95052100 | -0.68643500 |
| C | 5.74254000  | -4.22425000 | 0.50336500  |
| H | 6.53013000  | -3.37554900 | 2.31396400  |
| H | 4.87132700  | -4.75810900 | -1.38835900 |
| C | 5.86757100  | -0.73574900 | 2.06579100  |
| H | 6.43117800  | 0.06032400  | 1.56854800  |
| H | 4.92009300  | -0.31649800 | 2.42042800  |
| H | 6.44613200  | -1.08627900 | 2.92352700  |
| C | 3.92822900  | -2.37526800 | -2.29893400 |
| H | 4.12505500  | -3.16495400 | -3.02791100 |
| H | 2.84172100  | -2.32461500 | -2.15428700 |
| H | 4.24833500  | -1.42091700 | -2.72810700 |
| C | 6.21808100  | -5.62136600 | 0.81057600  |
| H | 6.30003800  | -5.78372600 | 1.88849100  |
| H | 5.53566100  | -6.37125700 | 0.40135000  |
| H | 7.20656100  | -5.79962700 | 0.37265200  |
| C | -1.75546300 | -0.12327700 | -1.22173400 |
| C | -0.39087100 | -0.33122400 | -0.99377300 |
| C | 0.50405300  | -0.36744600 | -2.05113400 |
| C | 0.02628200  | -0.21995400 | -3.35545000 |
| C | -1.33545500 | -0.03576200 | -3.57419800 |
| C | -2.24433600 | 0.02144700  | -2.51598100 |



|   |             |             |             |
|---|-------------|-------------|-------------|
| C | -1.52823600 | 0.01525200  | 1.05356300  |
| C | -0.17147400 | -0.44878500 | 0.48839800  |
| H | 1.56545800  | -0.49585000 | -1.85990500 |
| H | 0.71591900  | -0.24606200 | -4.19299600 |
| H | -1.70837400 | 0.07726000  | -4.58750800 |
| H | -3.29681000 | 0.17585300  | -2.71126300 |
| O | 0.88999800  | 0.31724300  | 0.99949000  |
| O | -1.72782600 | 0.33081300  | 2.19885800  |
| N | -2.45696200 | -0.06265100 | 0.01055000  |
| C | -3.88082200 | 0.34801400  | 0.08914000  |
| C | -3.92533200 | 1.80917600  | -0.40012100 |
| C | -4.58060800 | 2.24009200  | -1.55197800 |
| C | -3.17974800 | 2.74424300  | 0.33309400  |
| C | -4.50661700 | 3.57405400  | -1.95685900 |
| H | -5.15023500 | 1.53982500  | -2.15364100 |
| C | -3.10564300 | 4.07084500  | -0.06931700 |
| H | -2.66232000 | 2.42170600  | 1.23384600  |
| C | -3.77358300 | 4.49339500  | -1.21863500 |
| H | -5.02453600 | 3.88560300  | -2.85900000 |
| H | -2.52442400 | 4.77598800  | 0.51724600  |
| H | -3.71859100 | 5.53069900  | -1.53475500 |
| C | -4.42035500 | 0.19335300  | 1.52860800  |
| C | -4.29406600 | -1.05161700 | 2.15386700  |
| C | -5.14641600 | 1.19411300  | 2.16550900  |
| C | -4.83820200 | -1.27427100 | 3.40800700  |

|   |             |             |             |
|---|-------------|-------------|-------------|
| H | -3.76268500 | -1.84909600 | 1.64087500  |
| C | -5.70708100 | 0.96554700  | 3.42439800  |
| H | -5.28121200 | 2.16084700  | 1.69271400  |
| C | -5.54884900 | -0.26063400 | 4.05350800  |
| H | -4.71566800 | -2.24329500 | 3.88321600  |
| H | -6.26667000 | 1.75976400  | 3.90930100  |
| H | -5.98059700 | -0.43312300 | 5.03458200  |
| C | -4.74988500 | -0.64068100 | -0.71255400 |
| C | -6.10636300 | -0.35215900 | -0.90114900 |
| C | -4.27096800 | -1.88750700 | -1.11885100 |
| C | -6.94732300 | -1.25937900 | -1.53440100 |
| H | -6.50999000 | 0.58413100  | -0.52460400 |
| C | -5.11683900 | -2.80051800 | -1.74578500 |
| H | -3.23539400 | -2.16397500 | -0.94235300 |
| C | -6.45288700 | -2.48804100 | -1.96783800 |
| H | -7.99501100 | -1.01161800 | -1.67535300 |
| H | -4.71626600 | -3.76172400 | -2.05423200 |
| H | -7.10985400 | -3.19950200 | -2.45877300 |
| H | 2.10990000  | -2.65555300 | 1.55462200  |

### TS6(RS)

NImag=1 (-178.7746)

Sum of electronic and zero-point Energies= -2718.836303

Sum of electronic and thermal Energies= -2718.784644

Sum of electronic and thermal Enthalpies= -2718.783700

Sum of electronic and thermal Free Energies= -2718.922217

|   |             |             |             |
|---|-------------|-------------|-------------|
| C | 2.17024100  | -0.40562200 | 1.96131500  |
| O | 3.11524700  | -0.08266500 | 2.66871500  |
| C | 1.75002800  | -1.86672200 | 1.67667100  |
| C | 0.30505300  | -1.92542100 | 2.17546100  |
| H | 1.81164700  | -2.09720500 | 0.61392600  |
| H | 0.31650900  | -2.01374800 | 3.26921700  |
| C | -0.61564900 | -2.99080000 | 1.62401100  |
| C | -0.54088600 | -3.44469300 | 0.30178200  |
| C | -1.61971800 | -3.50767200 | 2.44960600  |
| C | -1.43915000 | -4.39838900 | -0.17148600 |
| H | 0.21180500  | -3.04668000 | -0.37179500 |
| C | -2.51475400 | -4.46519400 | 1.97969400  |
| H | -1.69601000 | -3.15282800 | 3.47477300  |
| C | -2.42527300 | -4.91620300 | 0.66474100  |
| H | -1.36436300 | -4.73575600 | -1.20148400 |
| H | -3.27985300 | -4.85834200 | 2.64293400  |
| H | -3.12013700 | -5.66367600 | 0.29325300  |
| C | 3.53779300  | 5.57036600  | 2.09533500  |
| C | 2.71476200  | 5.84840800  | 1.00707800  |
| C | 2.04202900  | 4.79741300  | 0.38806600  |
| C | 3.01443100  | 3.20612500  | 1.95264400  |
| C | 3.68595800  | 4.26197500  | 2.56403300  |
| H | 4.07014700  | 6.37990200  | 2.58606400  |
| H | 2.60344100  | 6.86705900  | 0.64505600  |

|   |              |              |              |
|---|--------------|--------------|--------------|
| H | 3. 11984500  | 2. 18271600  | 2. 31526900  |
| H | 4. 32973700  | 4. 06540600  | 3. 41584000  |
| C | 2. 19779900  | 3. 49900800  | 0. 86314100  |
| C | 1. 39188800  | 2. 51097800  | 0. 05436600  |
| C | 0. 73597500  | 3. 36960300  | -1. 09292200 |
| H | 0. 62950000  | 2. 02691500  | 0. 66815700  |
| C | 1. 10221600  | 4. 84586600  | -0. 79024300 |
| H | -0. 34589900 | 3. 22850900  | -1. 06553900 |
| H | 1. 55033500  | 5. 30915300  | -1. 67710700 |
| H | 0. 19709100  | 5. 41965100  | -0. 56094200 |
| N | 2. 23180500  | 1. 44614600  | -0. 48417200 |
| O | 1. 09853200  | 2. 97707200  | -2. 40784400 |
| C | 2. 80293000  | 1. 53011900  | -1. 72414400 |
| C | 2. 47968900  | 2. 71610500  | -2. 56603600 |
| H | 3. 08511400  | 3. 58533700  | -2. 26750700 |
| H | 2. 66284700  | 2. 50090400  | -3. 61933800 |
| N | 3. 50688100  | 0. 47576800  | -1. 99208600 |
| C | 2. 58209000  | 0. 26950800  | 0. 09207500  |
| N | 3. 36667700  | -0. 27841900 | -0. 84672500 |
| C | 3. 95144600  | -1. 58595300 | -0. 79520800 |
| C | 5. 06138700  | -1. 80025900 | 0. 02059600  |
| C | 3. 35862200  | -2. 59932200 | -1. 55941100 |
| C | 5. 56712700  | -3. 10120700 | 0. 08295800  |
| C | 3. 90213800  | -3. 87649700 | -1. 46304300 |
| C | 5. 00022000  | -4. 14619600 | -0. 64160500 |

|   |             |             |             |
|---|-------------|-------------|-------------|
| H | 6.43063600  | -3.29650800 | 0.71476300  |
| H | 3.45450400  | -4.68362900 | -2.03968200 |
| C | 5.68771400  | -0.67504100 | 0.80019900  |
| H | 5.84569700  | 0.19926200  | 0.15995800  |
| H | 5.03865900  | -0.37255500 | 1.62961300  |
| H | 6.65450000  | -0.98648000 | 1.20324400  |
| C | 2.17446400  | -2.30720200 | -2.44388900 |
| H | 1.73499800  | -3.23594200 | -2.81905300 |
| H | 1.39814700  | -1.74243000 | -1.91508500 |
| H | 2.47318400  | -1.69629400 | -3.30268700 |
| C | 5.55069000  | -5.54663500 | -0.54750700 |
| H | 6.46887500  | -5.57317800 | 0.04444800  |
| H | 4.82676000  | -6.22052300 | -0.07692200 |
| H | 5.77362200  | -5.95005200 | -1.54039200 |
| C | -2.43462000 | 0.19585200  | 1.77586600  |
| C | -1.38824700 | -0.05282200 | 2.66744300  |
| C | -1.55830400 | 0.08753400  | 4.03255500  |
| C | -2.80846800 | 0.47576100  | 4.51657300  |
| C | -3.85064200 | 0.71896900  | 3.62518800  |
| C | -3.68360400 | 0.58895200  | 2.24454800  |
| C | -0.64764300 | -0.32659800 | 0.43663900  |
| C | -0.17771000 | -0.47351500 | 1.89785300  |
| H | -0.72119100 | -0.08711200 | 4.70322300  |
| H | -2.96674700 | 0.59710300  | 5.58307900  |
| H | -4.82055100 | 1.02601800  | 4.00406000  |

|   |             |             |             |
|---|-------------|-------------|-------------|
| H | -4.50430200 | 0.80080800  | 1.57013500  |
| O | 0.94717400  | 0.33546800  | 2.14883400  |
| O | 0.08005900  | -0.51461100 | -0.51467500 |
| N | -1.98492400 | 0.03603800  | 0.43158400  |
| C | -2.84824600 | 0.24634200  | -0.75998400 |
| C | -4.14162900 | -0.57427300 | -0.52769400 |
| C | -5.40764100 | -0.13017100 | -0.91293200 |
| C | -4.04225500 | -1.82421800 | 0.09806000  |
| C | -6.53760300 | -0.91822100 | -0.69794900 |
| H | -5.53823300 | 0.84637500  | -1.36190300 |
| C | -5.16826800 | -2.61090700 | 0.30819300  |
| H | -3.07367300 | -2.18774600 | 0.43293900  |
| C | -6.42504400 | -2.16262500 | -0.09051900 |
| H | -7.51026800 | -0.54523400 | -1.00426400 |
| H | -5.05419700 | -3.57485300 | 0.79480000  |
| H | -7.30659100 | -2.77288300 | 0.08059600  |
| C | -2.11001800 | -0.26793200 | -2.02773400 |
| C | -1.24020700 | 0.58587000  | -2.71613500 |
| C | -2.21983700 | -1.58852900 | -2.45926600 |
| C | -0.48792700 | 0.13138000  | -3.78890700 |
| H | -1.11412800 | 1.61431900  | -2.39641800 |
| C | -1.46658900 | -2.04701800 | -3.54066000 |
| H | -2.88613000 | -2.28071400 | -1.95774100 |
| C | -0.59836800 | -1.19289600 | -4.20919500 |
| H | 0.19406100  | 0.81680500  | -4.28324300 |

|   |             |             |             |
|---|-------------|-------------|-------------|
| H | -1.56937500 | -3.08027000 | -3.86030400 |
| H | -0.01028400 | -1.55381000 | -5.04821600 |
| C | -3.12997100 | 1.75191000  | -0.93889200 |
| C | -3.74936000 | 2.19087400  | -2.11839600 |
| C | -2.73454200 | 2.71521900  | -0.01033100 |
| C | -3.99607700 | 3.53851900  | -2.34433700 |
| H | -4.00743900 | 1.46417600  | -2.88408300 |
| C | -2.98061800 | 4.07208800  | -0.23616500 |
| H | -2.21717800 | 2.42786400  | 0.89802600  |
| C | -3.61573100 | 4.48936000  | -1.39832500 |
| H | -4.47243900 | 3.84822900  | -3.26949600 |
| H | -2.66309300 | 4.79855200  | 0.50639000  |
| H | -3.80360100 | 5.54385500  | -1.57468400 |
| H | 2.42032100  | -2.53142500 | 2.22500600  |

### TS6(SR)

NImag=1 (-175.0852)

|                                              |              |
|----------------------------------------------|--------------|
| Sum of electronic and zero-point Energies=   | -2718.838859 |
| Sum of electronic and thermal Energies=      | -2718.787260 |
| Sum of electronic and thermal Enthalpies=    | -2718.786315 |
| Sum of electronic and thermal Free Energies= | -2718.922795 |

|   |             |            |            |
|---|-------------|------------|------------|
| C | 2.01415300  | 1.17525700 | 2.19967700 |
| O | 3.03275300  | 1.25190400 | 2.87230700 |
| C | 0.83805700  | 2.15366700 | 2.26021600 |
| C | -0.32809700 | 1.27023300 | 2.69568400 |

|   |             |             |             |
|---|-------------|-------------|-------------|
| H | 0.64605500  | 2.56794000  | 1.27097600  |
| H | -0.22672700 | 1.04046300  | 3.76499700  |
| C | -1.71563900 | 1.81749800  | 2.44813000  |
| C | -1.93306300 | 3.00919900  | 1.74970600  |
| C | -2.82606200 | 1.12333500  | 2.94546600  |
| C | -3.22661800 | 3.49069400  | 1.55282300  |
| H | -1.09659000 | 3.57774100  | 1.35429200  |
| C | -4.11828100 | 1.59310300  | 2.72954900  |
| H | -2.67087700 | 0.20501400  | 3.50894400  |
| C | -4.32406800 | 2.78040400  | 2.02890000  |
| H | -3.37115500 | 4.42639400  | 1.01961300  |
| H | -4.96609900 | 1.03519600  | 3.11727900  |
| H | -5.33102800 | 3.15143500  | 1.86589800  |
| C | 2.93163300  | -4.68968400 | -0.22440000 |
| C | 4.27215600  | -4.34062500 | -0.06449800 |
| C | 4.59425700  | -3.01670100 | 0.21868700  |
| C | 2.25100300  | -2.39914800 | 0.14860700  |
| C | 1.92706800  | -3.72620000 | -0.11743400 |
| H | 2.66581100  | -5.72047400 | -0.44019700 |
| H | 5.05241000  | -5.09126500 | -0.15831100 |
| H | 1.48128600  | -1.63810000 | 0.20840300  |
| H | 0.88515600  | -4.00345800 | -0.24877100 |
| C | 3.58594600  | -2.06157500 | 0.33213300  |
| C | 4.16467100  | -0.71742200 | 0.71675000  |
| C | 5.70057200  | -0.87492000 | 0.45132900  |



|   |             |             |             |
|---|-------------|-------------|-------------|
| H | 3.97594000  | -0.48761900 | 1.77000600  |
| C | 5.94927700  | -2.40010900 | 0.47119200  |
| H | 6.27248400  | -0.35901200 | 1.22442300  |
| H | 6.70223400  | -2.66442700 | -0.27785500 |
| H | 6.33882300  | -2.70700400 | 1.44928500  |
| N | 3.62629400  | 0.39377900  | -0.05409600 |
| O | 6.14677700  | -0.28301300 | -0.76539600 |
| C | 4.07658500  | 0.65457900  | -1.32014000 |
| C | 5.19897200  | -0.19544800 | -1.81439700 |
| H | 4.83306900  | -1.18864000 | -2.11231400 |
| H | 5.69594000  | 0.27451800  | -2.66343600 |
| N | 3.49241600  | 1.70017200  | -1.82086900 |
| C | 2.68503500  | 1.30406800  | 0.28733000  |
| N | 2.63281300  | 2.07552000  | -0.80801200 |
| C | 1.77723100  | 3.21656200  | -0.93418300 |
| C | 0.71022300  | 3.19020400  | -1.83220400 |
| C | 2.00700200  | 4.29512300  | -0.06533000 |
| C | -0.17901900 | 4.26898300  | -1.80658200 |
| C | 1.09116400  | 5.34267400  | -0.07783500 |
| C | -0.01542600 | 5.33969100  | -0.93382000 |
| H | -1.03159600 | 4.24956800  | -2.48256200 |
| H | 1.24401200  | 6.18286200  | 0.59641100  |
| C | 0.48653100  | 2.06877000  | -2.80974200 |
| H | 0.68952700  | 2.41560700  | -3.82892200 |
| H | 1.13376000  | 1.21622700  | -2.60519300 |

|   |             |             |             |
|---|-------------|-------------|-------------|
| H | -0.55269500 | 1.73393400  | -2.75796100 |
| C | 3.19892500  | 4.31515000  | 0.85889500  |
| H | 3.29941500  | 5.29968000  | 1.32190900  |
| H | 3.12709500  | 3.56609000  | 1.65611800  |
| H | 4.11925700  | 4.10061000  | 0.30562000  |
| C | -0.99398800 | 6.48700100  | -0.92023900 |
| H | -1.92765900 | 6.21506200  | -1.42038800 |
| H | -1.22951600 | 6.79406800  | 0.10349800  |
| H | -0.58246400 | 7.36131900  | -1.43642000 |
| C | -1.47034200 | -1.85015100 | 1.54726200  |
| C | -0.58306700 | -1.32379100 | 2.49263300  |
| C | -0.31254400 | -1.98105100 | 3.67716200  |
| C | -0.95488100 | -3.19420600 | 3.93280000  |
| C | -1.83224300 | -3.72128300 | 2.99031200  |
| C | -2.10117000 | -3.06657500 | 1.78433000  |
| C | -0.51168200 | -0.04942900 | 0.51239000  |
| C | 0.02661700  | -0.06364300 | 1.96301300  |
| H | 0.40999500  | -1.56286300 | 4.37230300  |
| H | -0.75839100 | -3.73246100 | 4.85388200  |
| H | -2.32274200 | -4.66994600 | 3.18511100  |
| H | -2.79021100 | -3.50332100 | 1.07445200  |
| O | 1.43298300  | -0.12724900 | 2.03068300  |
| O | -0.09723700 | 0.66335400  | -0.37428100 |
| N | -1.54011900 | -0.98536500 | 0.41613700  |
| C | -2.25286600 | -1.30991600 | -0.84796100 |

|   |             |             |             |
|---|-------------|-------------|-------------|
| C | -1.39147600 | -2.33754700 | -1.60574300 |
| C | -1.65560700 | -3.70943300 | -1.60381900 |
| C | -0.25256300 | -1.88153200 | -2.28569600 |
| C | -0.83920000 | -4.59543900 | -2.30834400 |
| H | -2.51900800 | -4.09948300 | -1.07618500 |
| C | 0.56179100  | -2.76497300 | -2.98401500 |
| H | -0.01911800 | -0.82073400 | -2.27112800 |
| C | 0.26400000  | -4.12590200 | -3.01111900 |
| H | -1.07494200 | -5.65533800 | -2.30381500 |
| H | 1.43640000  | -2.38707900 | -3.50462500 |
| H | 0.89812500  | -4.81445700 | -3.56092200 |
| C | -2.51484400 | -0.03372200 | -1.68164700 |
| C | -2.87336700 | 1.15489100  | -1.04202900 |
| C | -2.58861600 | -0.09570500 | -3.07357700 |
| C | -3.24237300 | 2.27151900  | -1.77994500 |
| H | -2.86435000 | 1.20903400  | 0.04251900  |
| C | -2.97895000 | 1.01994500  | -3.81387800 |
| H | -2.33952000 | -1.01541700 | -3.59297000 |
| C | -3.29762900 | 2.21123100  | -3.17247200 |
| H | -3.49434300 | 3.19002700  | -1.25775100 |
| H | -3.02597400 | 0.95137600  | -4.89639500 |
| H | -3.59409600 | 3.08265500  | -3.74871600 |
| C | -3.69498100 | -1.76852300 | -0.54635100 |
| C | -4.42420200 | -2.47322000 | -1.50865500 |
| C | -4.35738800 | -1.33670400 | 0.60470900  |

|   |             |             |             |
|---|-------------|-------------|-------------|
| C | -5.76366800 | -2.78699400 | -1.29916300 |
| H | -3.94737000 | -2.76919300 | -2.43807000 |
| C | -5.69735300 | -1.64802100 | 0.81329400  |
| H | -3.82438400 | -0.74834100 | 1.34387000  |
| C | -6.40558100 | -2.38345900 | -0.13202400 |
| H | -6.30693600 | -3.34164600 | -2.05798500 |
| H | -6.18801000 | -1.30849600 | 1.72071900  |
| H | -7.45017900 | -2.62839800 | 0.03222500  |
| H | 1.06106800  | 2.95725700  | 2.96509700  |

### TS6(SS)

NImag=1 (-197.9282)

|                                              |              |
|----------------------------------------------|--------------|
| Sum of electronic and zero-point Energies=   | -2718.829945 |
| Sum of electronic and thermal Energies=      | -2718.777922 |
| Sum of electronic and thermal Enthalpies=    | -2718.776978 |
| Sum of electronic and thermal Free Energies= | -2718.918225 |

|   |             |             |            |
|---|-------------|-------------|------------|
| C | -1.93478600 | 0.13353300  | 1.89980000 |
| O | -2.23306500 | 0.77837000  | 2.91067300 |
| C | -2.19385100 | -1.38051900 | 1.74010800 |
| C | -0.79939500 | -1.98193200 | 1.57748300 |
| H | -2.71807200 | -1.74654000 | 2.62564400 |
| H | -0.32362100 | -2.04188800 | 2.56498800 |
| H | -2.81136100 | -1.57479800 | 0.86149000 |
| C | -0.68054000 | -3.32489900 | 0.88964800 |
| C | -1.77789300 | -3.98800400 | 0.33766200 |

|   |             |             |             |
|---|-------------|-------------|-------------|
| C | 0.58491400  | -3.91697300 | 0.77574800  |
| C | -1.61676500 | -5.20555400 | -0.32200300 |
| H | -2.77565800 | -3.56549600 | 0.42329300  |
| C | 0.74570400  | -5.12934600 | 0.11487100  |
| H | 1.45395400  | -3.43389600 | 1.22167700  |
| C | -0.35576400 | -5.77858500 | -0.43955800 |
| H | -2.48518700 | -5.70516100 | -0.74211700 |
| H | 1.73720300  | -5.56516200 | 0.03768700  |
| H | -0.23093500 | -6.72766500 | -0.95220400 |
| C | 1.01204300  | 4.52375400  | -2.16336800 |
| C | 0.53367600  | 5.36772300  | -1.16134900 |
| C | -0.30137000 | 4.84123600  | -0.18146100 |
| C | -0.16891800 | 2.64041600  | -1.20043100 |
| C | 0.66219900  | 3.17167200  | -2.18646900 |
| H | 1.65165800  | 4.92735200  | -2.94340200 |
| H | 0.79772200  | 6.42170200  | -1.15642200 |
| H | -0.45884100 | 1.59296200  | -1.21999200 |
| H | 1.03941600  | 2.52206300  | -2.97173200 |
| C | -0.63790200 | 3.48900900  | -0.20481300 |
| C | -1.57383300 | 3.14973600  | 0.93464700  |
| C | -2.05448300 | 4.54463600  | 1.45837800  |
| H | -1.08728400 | 2.58656100  | 1.73456100  |
| C | -0.96488000 | 5.53352600  | 0.98504200  |
| H | -2.15142000 | 4.52565000  | 2.54479600  |
| H | -1.41777900 | 6.49636700  | 0.72957100  |

|   |             |             |             |
|---|-------------|-------------|-------------|
| H | -0.24279500 | 5.71347300  | 1.79073500  |
| N | -2.70297300 | 2.35398300  | 0.47580500  |
| O | -3.34698600 | 4.92515100  | 0.99907100  |
| C | -3.75424300 | 2.94091700  | -0.17035800 |
| C | -3.73819300 | 4.43074700  | -0.26812400 |
| H | -3.05556600 | 4.76180900  | -1.06387800 |
| H | -4.73927700 | 4.81185700  | -0.47203500 |
| N | -4.65312500 | 2.06444900  | -0.50109100 |
| C | -2.91736100 | 1.02194600  | 0.56306000  |
| N | -4.10902200 | 0.88527400  | -0.03749700 |
| C | -4.80158500 | -0.35277900 | -0.23274500 |
| C | -4.80663800 | -0.91423500 | -1.51147900 |
| C | -5.40277300 | -0.96415900 | 0.87158400  |
| C | -5.38413200 | -2.17492700 | -1.65813700 |
| C | -5.96511500 | -2.22473600 | 0.67261700  |
| C | -5.95486500 | -2.84739800 | -0.57690600 |
| H | -5.38540900 | -2.64236100 | -2.64040100 |
| H | -6.42567200 | -2.73189700 | 1.51745000  |
| C | -4.23397700 | -0.16748900 | -2.68721100 |
| H | -4.89901800 | 0.65254100  | -2.97730900 |
| H | -3.26082800 | 0.27667700  | -2.45255800 |
| H | -4.11466600 | -0.83478900 | -3.54481900 |
| C | -5.44788900 | -0.27673800 | 2.21146500  |
| H | -5.97625200 | -0.89805900 | 2.93825400  |
| H | -4.45195000 | -0.04751200 | 2.60860200  |

|   |             |             |             |
|---|-------------|-------------|-------------|
| H | -5.98097700 | 0.67690800  | 2.12619600  |
| C | -6.58232600 | -4.20546500 | -0.76318800 |
| H | -6.52426800 | -4.79774900 | 0.15374200  |
| H | -7.64095300 | -4.11098300 | -1.02954000 |
| H | -6.08866600 | -4.76225300 | -1.56426300 |
| C | 1.30568200  | -0.58336100 | -1.06835400 |
| C | -0.00590300 | -0.85857200 | -0.64906100 |
| C | -1.02328700 | -1.06952400 | -1.56175500 |
| C | -0.73851400 | -0.99532400 | -2.92741100 |
| C | 0.56128100  | -0.73049200 | -3.34192800 |
| C | 1.60183300  | -0.52936300 | -2.42932100 |
| C | 1.44093700  | -0.78867900 | 1.20842900  |
| C | -0.05217000 | -0.84249800 | 0.85409700  |
| H | -2.02772300 | -1.30567100 | -1.21639700 |
| H | -1.52234500 | -1.15996600 | -3.65948900 |
| H | 0.78968600  | -0.68804300 | -4.40271800 |
| H | 2.60057400  | -0.34254100 | -2.79946600 |
| O | -0.60423600 | 0.35726700  | 1.37211100  |
| O | 1.91132200  | -1.02128100 | 2.29596500  |
| N | 2.14510200  | -0.40671100 | 0.07024600  |
| C | 3.62863300  | -0.39215800 | 0.11411700  |
| C | 4.04390500  | -1.87026500 | 0.21197300  |
| C | 3.92964600  | -2.69306700 | -0.91612200 |
| C | 4.35538500  | -2.46267300 | 1.43854300  |
| C | 4.15509200  | -4.06240200 | -0.82756000 |

|   |             |              |              |
|---|-------------|--------------|--------------|
| H | 3. 65603000 | -2. 26297100 | -1. 87497900 |
| C | 4. 57846300 | -3. 83533000 | 1. 52771700  |
| H | 4. 39277400 | -1. 85211900 | 2. 33298200  |
| C | 4. 48686500 | -4. 63927200 | 0. 39624000  |
| H | 4. 06471000 | -4. 67909700 | -1. 71691400 |
| H | 4. 81530400 | -4. 27478100 | 2. 49184900  |
| H | 4. 66390100 | -5. 70855700 | 0. 46759300  |
| C | 4. 12153000 | 0. 48273400  | 1. 28547700  |
| C | 3. 32362300 | 1. 47163200  | 1. 86141700  |
| C | 5. 46322300 | 0. 39825100  | 1. 66366500  |
| C | 3. 85050700 | 2. 33459800  | 2. 81732900  |
| H | 2. 28081000 | 1. 57003800  | 1. 57404400  |
| C | 5. 98852100 | 1. 25824300  | 2. 62267300  |
| H | 6. 10627100 | -0. 34482800 | 1. 19872900  |
| C | 5. 18205700 | 2. 23037500  | 3. 20661800  |
| H | 3. 20885500 | 3. 08864600  | 3. 26279800  |
| H | 7. 03279100 | 1. 17013300  | 2. 90681500  |
| H | 5. 58882300 | 2. 90369300  | 3. 95468700  |
| C | 4. 18742800 | 0. 35915100  | -1. 10570700 |
| C | 5. 30447800 | -0. 07932600 | -1. 81321200 |
| C | 3. 61880700 | 1. 59394600  | -1. 43844600 |
| C | 5. 81811000 | 0. 68354300  | -2. 86403300 |
| H | 5. 77965800 | -1. 01908300 | -1. 55140700 |
| C | 4. 12672900 | 2. 34907500  | -2. 48487300 |
| H | 2. 76008200 | 1. 95776000  | -0. 87925600 |



|   |            |            |             |
|---|------------|------------|-------------|
| C | 5.22875500 | 1.89318000 | -3.20929500 |
| H | 6.68568300 | 0.32415900 | -3.40930200 |
| H | 3.66162700 | 3.30014400 | -2.72849300 |
| H | 5.62876600 | 2.48314600 | -4.02826400 |

**P(RR)**

NImag=0

|                                              |              |
|----------------------------------------------|--------------|
| Sum of electronic and zero-point Energies=   | -1667.327096 |
| Sum of electronic and thermal Energies=      | -1667.296626 |
| Sum of electronic and thermal Enthalpies=    | -1667.295682 |
| Sum of electronic and thermal Free Energies= | -1667.388169 |

|   |             |             |             |
|---|-------------|-------------|-------------|
| C | -4.08048100 | -1.87337300 | 1.42472500  |
| O | -4.85097900 | -2.70028800 | 1.80915500  |
| C | -4.34539400 | -0.41457500 | 1.07407100  |
| C | -2.94616200 | 0.18956200  | 1.12928800  |
| H | -4.78197800 | -0.36195300 | 0.06964900  |
| H | -2.67496500 | 0.30112900  | 2.18727300  |
| C | -2.67528700 | 1.49582900  | 0.42942700  |
| C | -3.05586500 | 1.73329100  | -0.89551600 |
| C | -1.99312800 | 2.50187500  | 1.11985300  |
| C | -2.75403100 | 2.94467300  | -1.51191800 |
| H | -3.58334900 | 0.96791600  | -1.45700600 |
| C | -1.68840300 | 3.71419300  | 0.50587600  |
| H | -1.69722100 | 2.32678500  | 2.15221800  |
| C | -2.07193400 | 3.93895300  | -0.81305900 |

|   |             |             |             |
|---|-------------|-------------|-------------|
| H | -3.05560600 | 3.11170900  | -2.54147400 |
| H | -1.15379100 | 4.48081500  | 1.05825000  |
| H | -1.84408300 | 4.88549800  | -1.29424100 |
| C | -0.60654100 | -0.77369900 | -1.13480400 |
| C | -1.91097300 | -1.16931700 | -0.82984300 |
| C | -2.77763400 | -1.61649100 | -1.81070000 |
| C | -2.34141200 | -1.62276800 | -3.13691700 |
| C | -1.05332600 | -1.19249400 | -3.44236700 |
| C | -0.16295100 | -0.77111500 | -2.45194000 |
| C | -0.66281300 | -0.84996100 | 1.15521400  |
| C | -2.10162700 | -1.03144600 | 0.64629800  |
| H | -3.77149500 | -1.97274300 | -1.55037200 |
| H | -3.00030000 | -1.97112400 | -3.92513100 |
| H | -0.71753000 | -1.19772700 | -4.47465300 |
| H | 0.83838500  | -0.45801300 | -2.71495000 |
| O | -2.75521300 | -2.14588000 | 1.23347100  |
| O | -0.31996800 | -0.97904800 | 2.30313600  |
| N | 0.09727100  | -0.44594300 | 0.05793900  |
| C | 1.55958600  | -0.18917100 | 0.06855800  |
| C | 2.22085900  | -1.51014000 | -0.37343300 |
| C | 2.95325300  | -1.67266500 | -1.54769500 |
| C | 1.99092900  | -2.63548300 | 0.43131300  |
| C | 3.45807100  | -2.92422200 | -1.90432900 |
| H | 3.13220800  | -0.82801600 | -2.20436600 |
| C | 2.49432400  | -3.87981800 | 0.07800500  |

|   |              |              |              |
|---|--------------|--------------|--------------|
| H | 1. 41835500  | -2. 52513500 | 1. 34952500  |
| C | 3. 23446300  | -4. 02927500 | -1. 09457600 |
| H | 4. 02237700  | -3. 02718900 | -2. 82625700 |
| H | 2. 30441300  | -4. 73575700 | 0. 71826800  |
| H | 3. 62647500  | -5. 00224300 | -1. 37436900 |
| C | 2. 02584800  | 0. 26348800  | 1. 47026700  |
| C | 1. 40318800  | 1. 36967600  | 2. 05864800  |
| C | 3. 12938300  | -0. 29968800 | 2. 10257700  |
| C | 1. 84336600  | 1. 86724700  | 3. 27475600  |
| H | 0. 56815900  | 1. 84311300  | 1. 54731900  |
| C | 3. 58135000  | 0. 20965300  | 3. 32183800  |
| H | 3. 64795800  | -1. 14040100 | 1. 65560100  |
| C | 2. 93829900  | 1. 28531400  | 3. 91615300  |
| H | 1. 33867700  | 2. 71804000  | 3. 72326000  |
| H | 4. 44174700  | -0. 24627300 | 3. 80211600  |
| H | 3. 28780700  | 1. 67674400  | 4. 86647000  |
| C | 1. 87849000  | 1. 03114200  | -0. 81710500 |
| C | 3. 21886600  | 1. 35453700  | -1. 05947900 |
| C | 0. 89003200  | 1. 91558900  | -1. 25292600 |
| C | 3. 56015800  | 2. 49897800  | -1. 76981800 |
| H | 4. 00230900  | 0. 71265800  | -0. 66499900 |
| C | 1. 23423500  | 3. 06707900  | -1. 95954500 |
| H | -0. 15848200 | 1. 72638200  | -1. 03887200 |
| C | 2. 56546500  | 3. 35867100  | -2. 23179800 |
| H | 4. 60647200  | 2. 72560000  | -1. 95041600 |

|   |             |            |             |
|---|-------------|------------|-------------|
| H | 0.44518200  | 3.73544100 | -2.29131600 |
| H | 2.82997600  | 4.25415400 | -2.78551800 |
| H | -5.05653200 | 0.01962700 | 1.77772200  |

**P(RS)**

NImag=0

|                                              |              |
|----------------------------------------------|--------------|
| Sum of electronic and zero-point Energies=   | -1667.330435 |
| Sum of electronic and thermal Energies=      | -1667.300151 |
| Sum of electronic and thermal Enthalpies=    | -1667.299206 |
| Sum of electronic and thermal Free Energies= | -1667.390401 |

|   |            |             |             |
|---|------------|-------------|-------------|
| C | 3.58593900 | -2.30598700 | 1.48989800  |
| O | 4.08610900 | -3.17494900 | 2.13734100  |
| C | 3.86491800 | -0.81263200 | 1.52188000  |
| C | 3.27711200 | -0.32905800 | 0.19656400  |
| H | 3.34399800 | -0.39412800 | 2.38717400  |
| H | 3.99990500 | -0.54954200 | -0.60001300 |
| C | 2.87136600 | 1.12038900  | 0.07196000  |
| C | 2.25955600 | 1.82131400  | 1.11739400  |
| C | 3.09346400 | 1.78159900  | -1.14017700 |
| C | 1.89933600 | 3.15657500  | 0.95413600  |
| H | 2.04093300 | 1.32502800  | 2.05878200  |
| C | 2.73319800 | 3.11624400  | -1.30361100 |
| H | 3.55667200 | 1.24085100  | -1.96214100 |
| C | 2.13685100 | 3.80963400  | -0.25277400 |
| H | 1.42261900 | 3.68131500  | 1.77667300  |

|   |             |             |             |
|---|-------------|-------------|-------------|
| H | 2.92151300  | 3.61345100  | -2.25068000 |
| H | 1.85678900  | 4.85164400  | -0.37476800 |
| C | 0.29903800  | -1.02393900 | -1.43274200 |
| C | 1.61598700  | -1.49165700 | -1.39796700 |
| C | 2.24373900  | -1.97762600 | -2.53009200 |
| C | 1.53350900  | -2.00110900 | -3.73072800 |
| C | 0.21746700  | -1.54653300 | -3.76223100 |
| C | -0.42256800 | -1.05690900 | -2.62162500 |
| C | 0.87223300  | -0.93800200 | 0.78351900  |
| C | 2.12867500  | -1.35876500 | -0.00576600 |
| H | 3.26162100  | -2.35339200 | -2.46961900 |
| H | 1.99828900  | -2.38410000 | -4.63297700 |
| H | -0.33726900 | -1.57494600 | -4.69491800 |
| H | -1.45143800 | -0.72329100 | -2.67230600 |
| O | 2.64066500  | -2.56887800 | 0.53537500  |
| O | 0.84358400  | -0.90776000 | 1.99199200  |
| N | -0.11928900 | -0.61733900 | -0.13054400 |
| C | -1.44953100 | -0.01293800 | 0.15950000  |
| C | -1.69145500 | 1.06081200  | -0.93114000 |
| C | -2.93050100 | 1.26994100  | -1.53771000 |
| C | -0.61748300 | 1.86902100  | -1.32718900 |
| C | -3.09416600 | 2.26476200  | -2.50227700 |
| H | -3.77992400 | 0.64627600  | -1.28832500 |
| C | -0.78176500 | 2.86327300  | -2.28335300 |
| H | 0.36370600  | 1.71858300  | -0.88500900 |

|   |             |             |             |
|---|-------------|-------------|-------------|
| C | -2.02474400 | 3.06766700  | -2.87832700 |
| H | -4.06807900 | 2.40120300  | -2.96257600 |
| H | 0.07294600  | 3.47132800  | -2.56455400 |
| H | -2.15459500 | 3.83854800  | -3.63155400 |
| C | -1.44511400 | 0.66671200  | 1.55820900  |
| C | -1.70100600 | -0.10292100 | 2.70051600  |
| C | -1.21396500 | 2.03131100  | 1.72337800  |
| C | -1.71260900 | 0.46927800  | 3.96345100  |
| H | -1.86893800 | -1.16991000 | 2.59855700  |
| C | -1.22248700 | 2.60924400  | 2.99453500  |
| H | -1.03130000 | 2.66923500  | 0.86729600  |
| C | -1.47156100 | 1.83384300  | 4.11783300  |
| H | -1.90519300 | -0.15407000 | 4.83102100  |
| H | -1.04781600 | 3.67692200  | 3.09415500  |
| H | -1.48502900 | 2.28453400  | 5.10571900  |
| C | -2.53427400 | -1.10621200 | 0.15385700  |
| C | -3.82566600 | -0.78641400 | 0.59706700  |
| C | -2.27536000 | -2.42093200 | -0.22959600 |
| C | -4.83409900 | -1.74050800 | 0.61507900  |
| H | -4.03137300 | 0.21937600  | 0.95404400  |
| C | -3.28630200 | -3.38309200 | -0.20462600 |
| H | -1.27989900 | -2.71886800 | -0.53749400 |
| C | -4.56861700 | -3.04734900 | 0.20789900  |
| H | -5.82545400 | -1.46636500 | 0.96266800  |
| H | -3.05701400 | -4.40143000 | -0.50287500 |

|   |             |             |            |
|---|-------------|-------------|------------|
| H | -5.35300100 | -3.79762400 | 0.22952700 |
| H | 4.93478400  | -0.63076300 | 1.63189600 |

**P(SR)**

NImag=0

|                                              |              |
|----------------------------------------------|--------------|
| Sum of electronic and zero-point Energies=   | -1667.332079 |
| Sum of electronic and thermal Energies=      | -1667.301545 |
| Sum of electronic and thermal Enthalpies=    | -1667.300601 |
| Sum of electronic and thermal Free Energies= | -1667.393497 |

|   |            |             |             |
|---|------------|-------------|-------------|
| C | 3.70997000 | -1.81239500 | -1.72696800 |
| O | 4.24351900 | -2.57308000 | -2.47553000 |
| C | 3.91918100 | -0.31229200 | -1.58158400 |
| C | 3.33808900 | -0.02834300 | -0.19819600 |
| H | 4.97628300 | -0.06572200 | -1.68834600 |
| H | 4.07944900 | -0.33175900 | 0.55315500  |
| H | 3.35792700 | 0.17480200  | -2.38367200 |
| C | 2.86001200 | 1.36096200  | 0.14718200  |
| C | 2.34625200 | 2.23936100  | -0.80981400 |
| C | 2.88484000 | 1.76646500  | 1.48634000  |
| C | 1.88011200 | 3.49829400  | -0.43562400 |
| H | 2.28961200 | 1.93956500  | -1.85280100 |
| C | 2.41794700 | 3.02289100  | 1.86165600  |
| H | 3.27204500 | 1.08371400  | 2.23934100  |
| C | 1.91473900 | 3.89460900  | 0.89837900  |
| H | 1.48413100 | 4.17001000  | -1.19193500 |

|   |             |             |             |
|---|-------------|-------------|-------------|
| H | 2.44945700  | 3.32010900  | 2.90573300  |
| H | 1.55208700  | 4.87689200  | 1.18533800  |
| C | 0.40992800  | -0.94886200 | 1.33590000  |
| C | 1.72469100  | -1.41243200 | 1.24137000  |
| C | 2.37183300  | -1.98736400 | 2.31945600  |
| C | 1.68151000  | -2.10653100 | 3.52614600  |
| C | 0.37329600  | -1.63882200 | 3.62197700  |
| C | -0.28291300 | -1.05421800 | 2.53633100  |
| C | 0.95219700  | -0.65746600 | -0.86629400 |
| C | 2.22837700  | -1.11605600 | -0.12759700 |
| H | 3.38854900  | -2.35589900 | 2.21260700  |
| H | 2.15915900  | -2.56602400 | 4.38489100  |
| H | -0.16026700 | -1.73091500 | 4.56289400  |
| H | -1.29887200 | -0.69765800 | 2.63955300  |
| O | 2.78643400  | -2.23015100 | -0.80662100 |
| O | 0.88560300  | -0.55864500 | -2.06989300 |
| N | -0.02634500 | -0.41806000 | 0.08667000  |
| C | -1.45957700 | -0.11560000 | -0.17571900 |
| C | -2.20257600 | -1.45352800 | 0.00537800  |
| C | -3.18235900 | -1.69098300 | 0.96722900  |
| C | -1.80342900 | -2.51578500 | -0.81815500 |
| C | -3.76388800 | -2.95368400 | 1.09380100  |
| H | -3.49672900 | -0.89939100 | 1.63871900  |
| C | -2.38288600 | -3.77115700 | -0.69472600 |
| H | -1.03636600 | -2.34692100 | -1.57106700 |



|   |             |             |             |
|---|-------------|-------------|-------------|
| C | -3.37117400 | -3.99490500 | 0.26397800  |
| H | -4.52261600 | -3.11610900 | 1.85320400  |
| H | -2.05957100 | -4.57761900 | -1.34547800 |
| H | -3.82339300 | -4.97664200 | 0.36496500  |
| C | -1.65910300 | 0.47309600  | -1.59123200 |
| C | -0.96388800 | 1.64008700  | -1.92554900 |
| C | -2.59763300 | -0.02814400 | -2.48727000 |
| C | -1.16394800 | 2.26161200  | -3.14654600 |
| H | -0.25848800 | 2.05701300  | -1.21234000 |
| C | -2.81085100 | 0.60703800  | -3.71365900 |
| H | -3.17233900 | -0.91470600 | -2.24382000 |
| C | -2.09249800 | 1.74408500  | -4.05212900 |
| H | -0.60201500 | 3.15795600  | -3.39343100 |
| H | -3.54488000 | 0.20009300  | -4.40242100 |
| H | -2.25589300 | 2.23169500  | -5.00821600 |
| C | -1.92073600 | 1.02355800  | 0.75155900  |
| C | -3.27398900 | 1.38100600  | 0.77137100  |
| C | -1.01063300 | 1.81746000  | 1.44985700  |
| C | -3.71292900 | 2.46550000  | 1.52102400  |
| H | -3.98413700 | 0.81682900  | 0.17229100  |
| C | -1.44970900 | 2.91190600  | 2.19272500  |
| H | 0.05200100  | 1.59776800  | 1.40680000  |
| C | -2.80088000 | 3.23317700  | 2.24343600  |
| H | -4.76806700 | 2.72127800  | 1.52690500  |
| H | -0.72013400 | 3.51369300  | 2.72724000  |

|   |             |            |            |
|---|-------------|------------|------------|
| H | -3.14120400 | 4.08414400 | 2.82536600 |
|---|-------------|------------|------------|

**P(SS)**

NImag=0

|                                            |              |
|--------------------------------------------|--------------|
| Sum of electronic and zero-point Energies= | -1667.325774 |
|--------------------------------------------|--------------|

|                                         |              |
|-----------------------------------------|--------------|
| Sum of electronic and thermal Energies= | -1667.295241 |
|-----------------------------------------|--------------|

|                                           |              |
|-------------------------------------------|--------------|
| Sum of electronic and thermal Enthalpies= | -1667.294297 |
|-------------------------------------------|--------------|

|                                              |              |
|----------------------------------------------|--------------|
| Sum of electronic and thermal Free Energies= | -1667.387378 |
|----------------------------------------------|--------------|

|   |            |            |             |
|---|------------|------------|-------------|
| C | 2.90327800 | 3.39856800 | -0.08560300 |
|---|------------|------------|-------------|

|   |            |            |             |
|---|------------|------------|-------------|
| O | 3.11104900 | 4.57205900 | -0.00895200 |
|---|------------|------------|-------------|

|   |            |            |             |
|---|------------|------------|-------------|
| C | 3.86122800 | 2.28618400 | -0.47236900 |
|---|------------|------------|-------------|

|   |            |            |             |
|---|------------|------------|-------------|
| C | 2.93225500 | 1.13357700 | -0.83613500 |
|---|------------|------------|-------------|

|   |            |            |             |
|---|------------|------------|-------------|
| H | 4.51929900 | 2.61437400 | -1.27800100 |
|---|------------|------------|-------------|

|   |            |            |             |
|---|------------|------------|-------------|
| H | 2.57249500 | 1.29985700 | -1.86028100 |
|---|------------|------------|-------------|

|   |            |            |            |
|---|------------|------------|------------|
| H | 4.48155100 | 2.07238300 | 0.40554200 |
|---|------------|------------|------------|

|   |            |             |             |
|---|------------|-------------|-------------|
| C | 3.44832700 | -0.28266400 | -0.72742600 |
|---|------------|-------------|-------------|

|   |            |             |             |
|---|------------|-------------|-------------|
| C | 4.70444500 | -0.58507700 | -0.20335800 |
|---|------------|-------------|-------------|

|   |            |             |             |
|---|------------|-------------|-------------|
| C | 2.62850300 | -1.33443800 | -1.15675700 |
|---|------------|-------------|-------------|

|   |            |             |             |
|---|------------|-------------|-------------|
| C | 5.13486000 | -1.90665200 | -0.09881000 |
|---|------------|-------------|-------------|

|   |            |            |            |
|---|------------|------------|------------|
| H | 5.37104100 | 0.20985300 | 0.11737100 |
|---|------------|------------|------------|

|   |            |             |             |
|---|------------|-------------|-------------|
| C | 3.05743800 | -2.65256400 | -1.05165100 |
|---|------------|-------------|-------------|

|   |            |             |             |
|---|------------|-------------|-------------|
| H | 1.65205000 | -1.12479600 | -1.59462500 |
|---|------------|-------------|-------------|

|   |            |             |             |
|---|------------|-------------|-------------|
| C | 4.31163500 | -2.94425600 | -0.51938500 |
|---|------------|-------------|-------------|

|   |            |             |            |
|---|------------|-------------|------------|
| H | 6.11854500 | -2.11933500 | 0.30900200 |
|---|------------|-------------|------------|

|   |            |             |             |
|---|------------|-------------|-------------|
| H | 2.40693400 | -3.45088600 | -1.39381600 |
|---|------------|-------------|-------------|

|   |             |             |             |
|---|-------------|-------------|-------------|
| H | 4.64646300  | -3.97402900 | -0.44082000 |
| C | 0.32478000  | 0.09978500  | 1.44410800  |
| C | 1.58230200  | 0.71549600  | 1.37072000  |
| C | 2.51141800  | 0.58018400  | 2.38522300  |
| C | 2.19535800  | -0.20293400 | 3.49530600  |
| C | 0.96270100  | -0.84256100 | 3.55059900  |
| C | 0.01240600  | -0.70762200 | 2.53463900  |
| C | 0.38686500  | 1.04353900  | -0.64089100 |
| C | 1.70033600  | 1.43158000  | 0.05910400  |
| H | 3.48095700  | 1.06459900  | 2.30953100  |
| H | 2.91221500  | -0.32395400 | 4.30010100  |
| H | 0.71908600  | -1.46740300 | 4.40425100  |
| H | -0.93451400 | -1.22152500 | 2.62200100  |
| O | 1.68789400  | 2.85703500  | 0.21087800  |
| O | 0.15359900  | 1.24130100  | -1.80999200 |
| N | -0.44272200 | 0.43360100  | 0.28542000  |
| C | -1.71681000 | -0.18067700 | -0.17137600 |
| C | -1.29730600 | -1.41662600 | -0.98504200 |
| C | -0.86717700 | -2.57077600 | -0.31851700 |
| C | -1.17327600 | -1.36529700 | -2.37664100 |
| C | -0.36719800 | -3.65906800 | -1.02514300 |
| H | -0.92735800 | -2.62475300 | 0.76389400  |
| C | -0.66544400 | -2.45357800 | -3.08349400 |
| H | -1.45348200 | -0.46226800 | -2.90628800 |
| C | -0.26937100 | -3.60684700 | -2.41385600 |

|   |             |             |             |
|---|-------------|-------------|-------------|
| H | -0.04980300 | -4.54696800 | -0.48617200 |
| H | -0.57768600 | -2.39275900 | -4.16388000 |
| H | 0.11888800  | -4.45665800 | -2.96778600 |
| C | -2.55685000 | 0.83917100  | -0.96836900 |
| C | -2.39621500 | 2.21680500  | -0.82003900 |
| C | -3.62515400 | 0.36726000  | -1.73428600 |
| C | -3.26450800 | 3.10122900  | -1.45269200 |
| H | -1.58487700 | 2.61279100  | -0.21694600 |
| C | -4.49082800 | 1.25090300  | -2.36969000 |
| H | -3.78626000 | -0.70328700 | -1.83119500 |
| C | -4.31170600 | 2.62427700  | -2.23431000 |
| H | -3.11367600 | 4.16976900  | -1.33431500 |
| H | -5.31015900 | 0.86192300  | -2.96660900 |
| H | -4.98584600 | 3.31658400  | -2.72892900 |
| C | -2.63077300 | -0.48237400 | 1.02766300  |
| C | -3.42425300 | -1.62743800 | 1.07762500  |
| C | -2.77766400 | 0.48298400  | 2.03060900  |
| C | -4.31489700 | -1.82593900 | 2.13267500  |
| H | -3.35368800 | -2.37395100 | 0.29338800  |
| C | -3.65845500 | 0.28171800  | 3.08431600  |
| H | -2.18415700 | 1.39271200  | 1.98801900  |
| C | -4.42869400 | -0.87974100 | 3.14344500  |
| H | -4.92062400 | -2.72659200 | 2.15640000  |
| H | -3.74860800 | 1.03613900  | 3.85967300  |
| H | -5.11940300 | -1.03697900 | 3.96591400  |
